# Supplementary material for: N-Acetyl-L-cysteine facilitates tendon repair and promotes the tenogenic differentiation of tendon stem/progenitor cells by enhancing the integrin α5/β1/PI3K/AKT signaling
Source: PubMed Central journal article supplement (PMC9814204; doi:10.1186/s12860-022-00463-0), 2023-01-05

# Fig2B SCX

Three times repeated exposure image

Fig 2

A

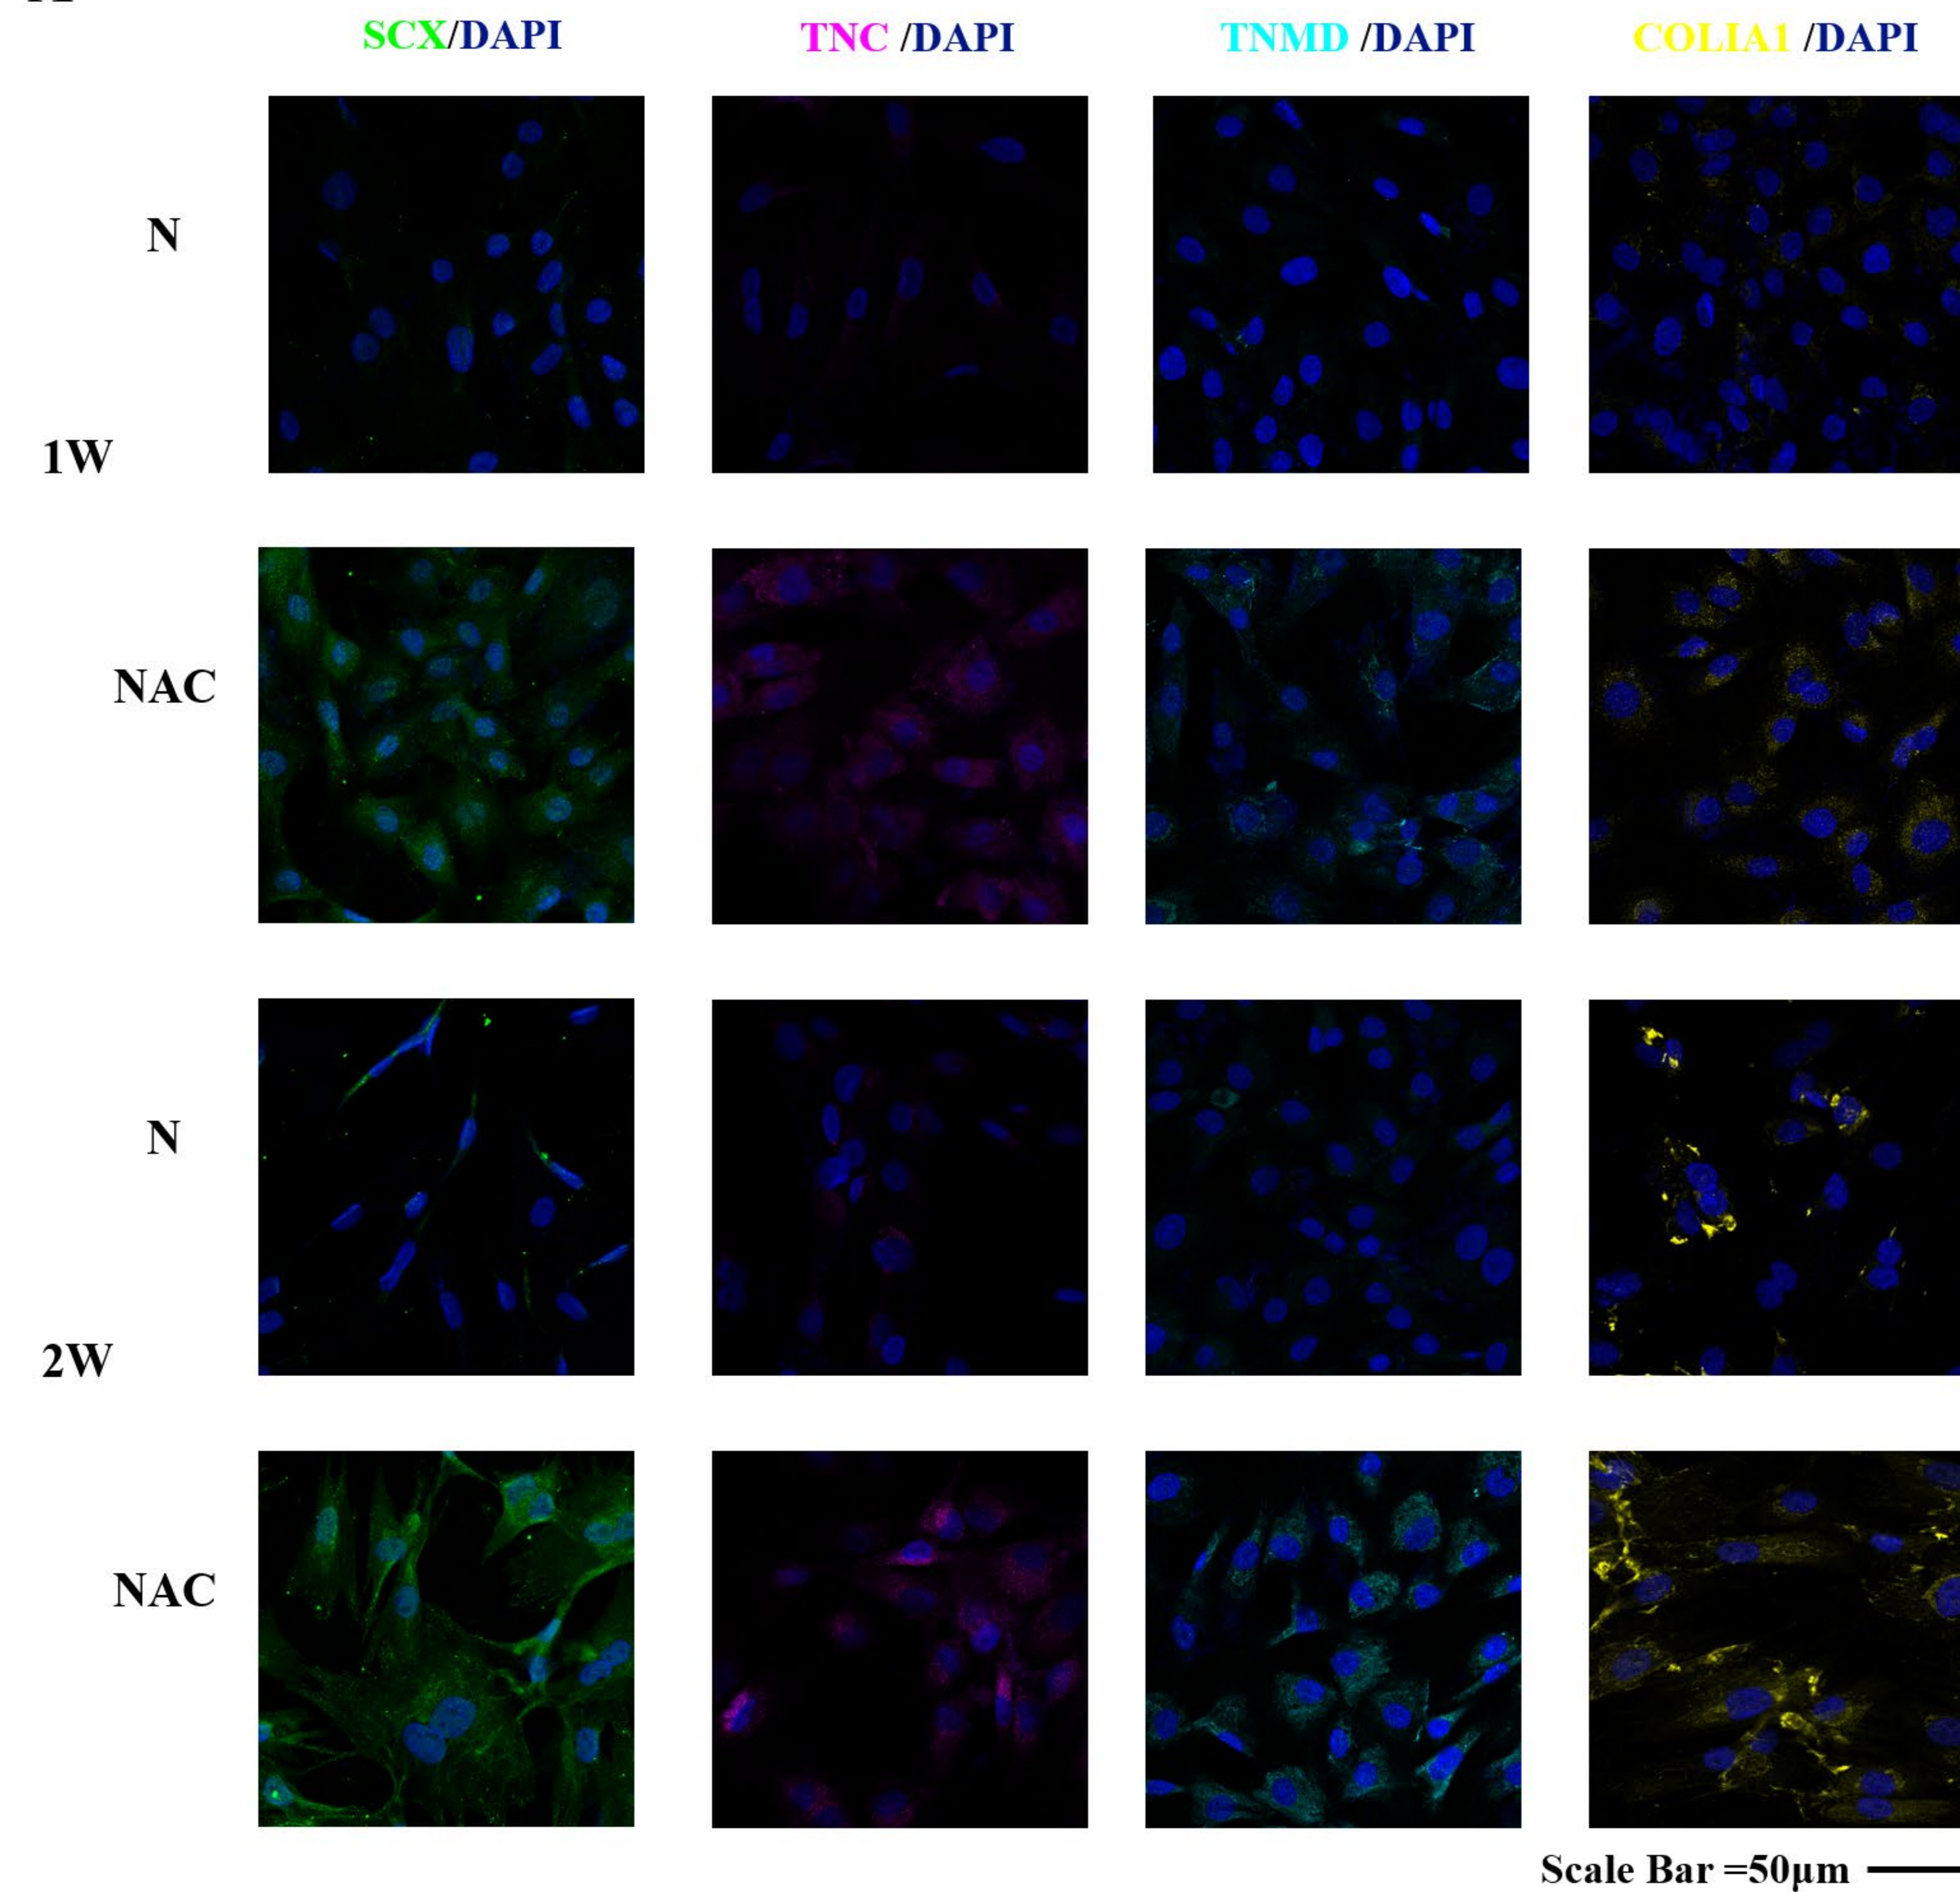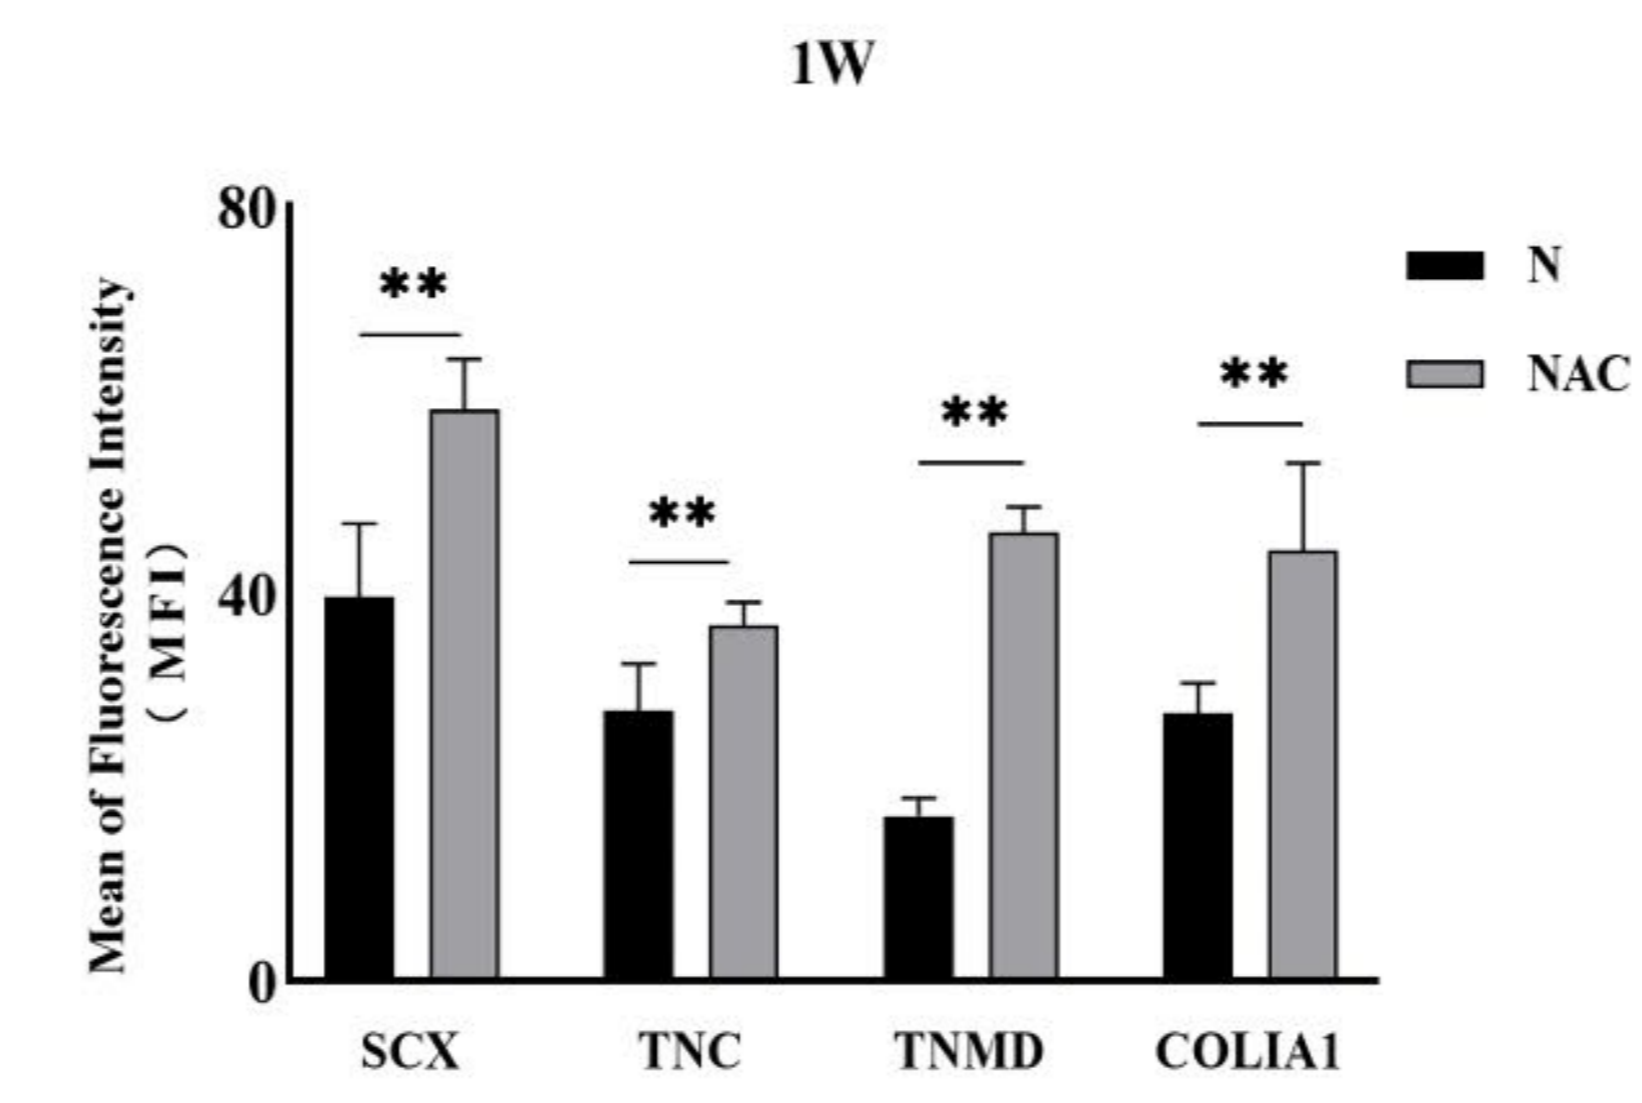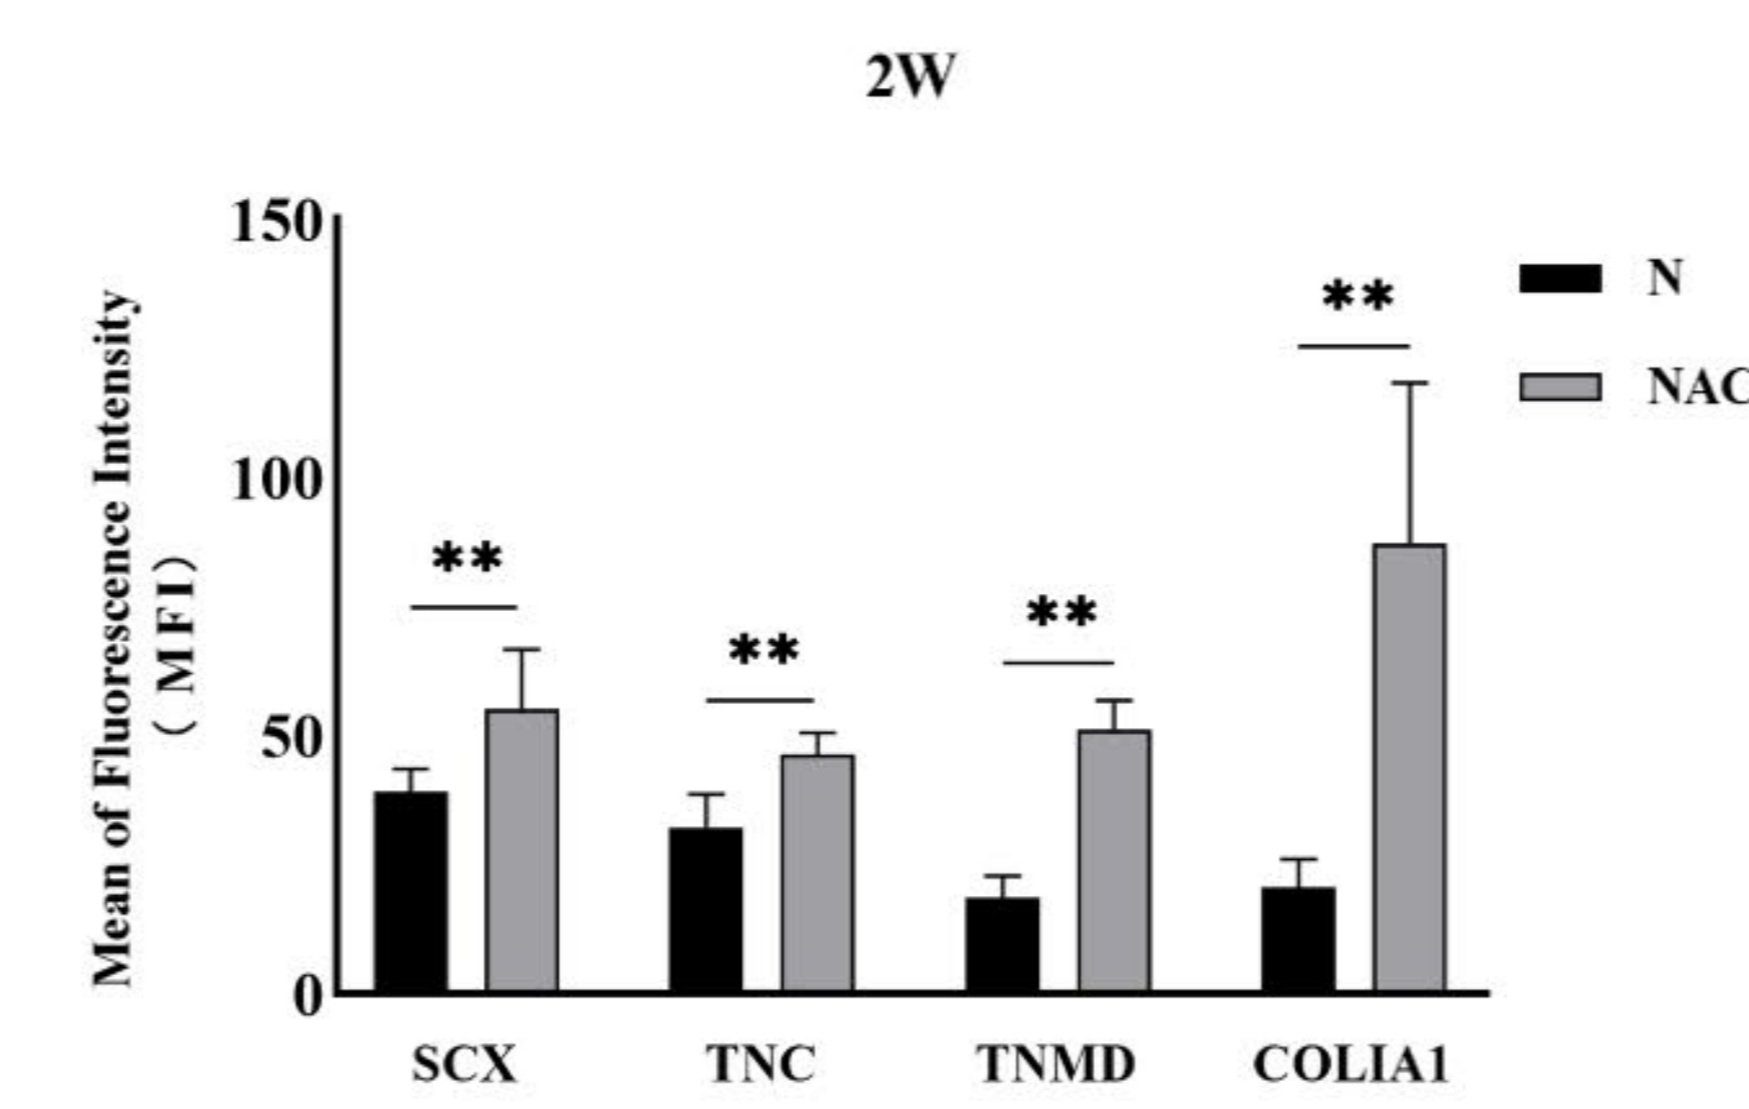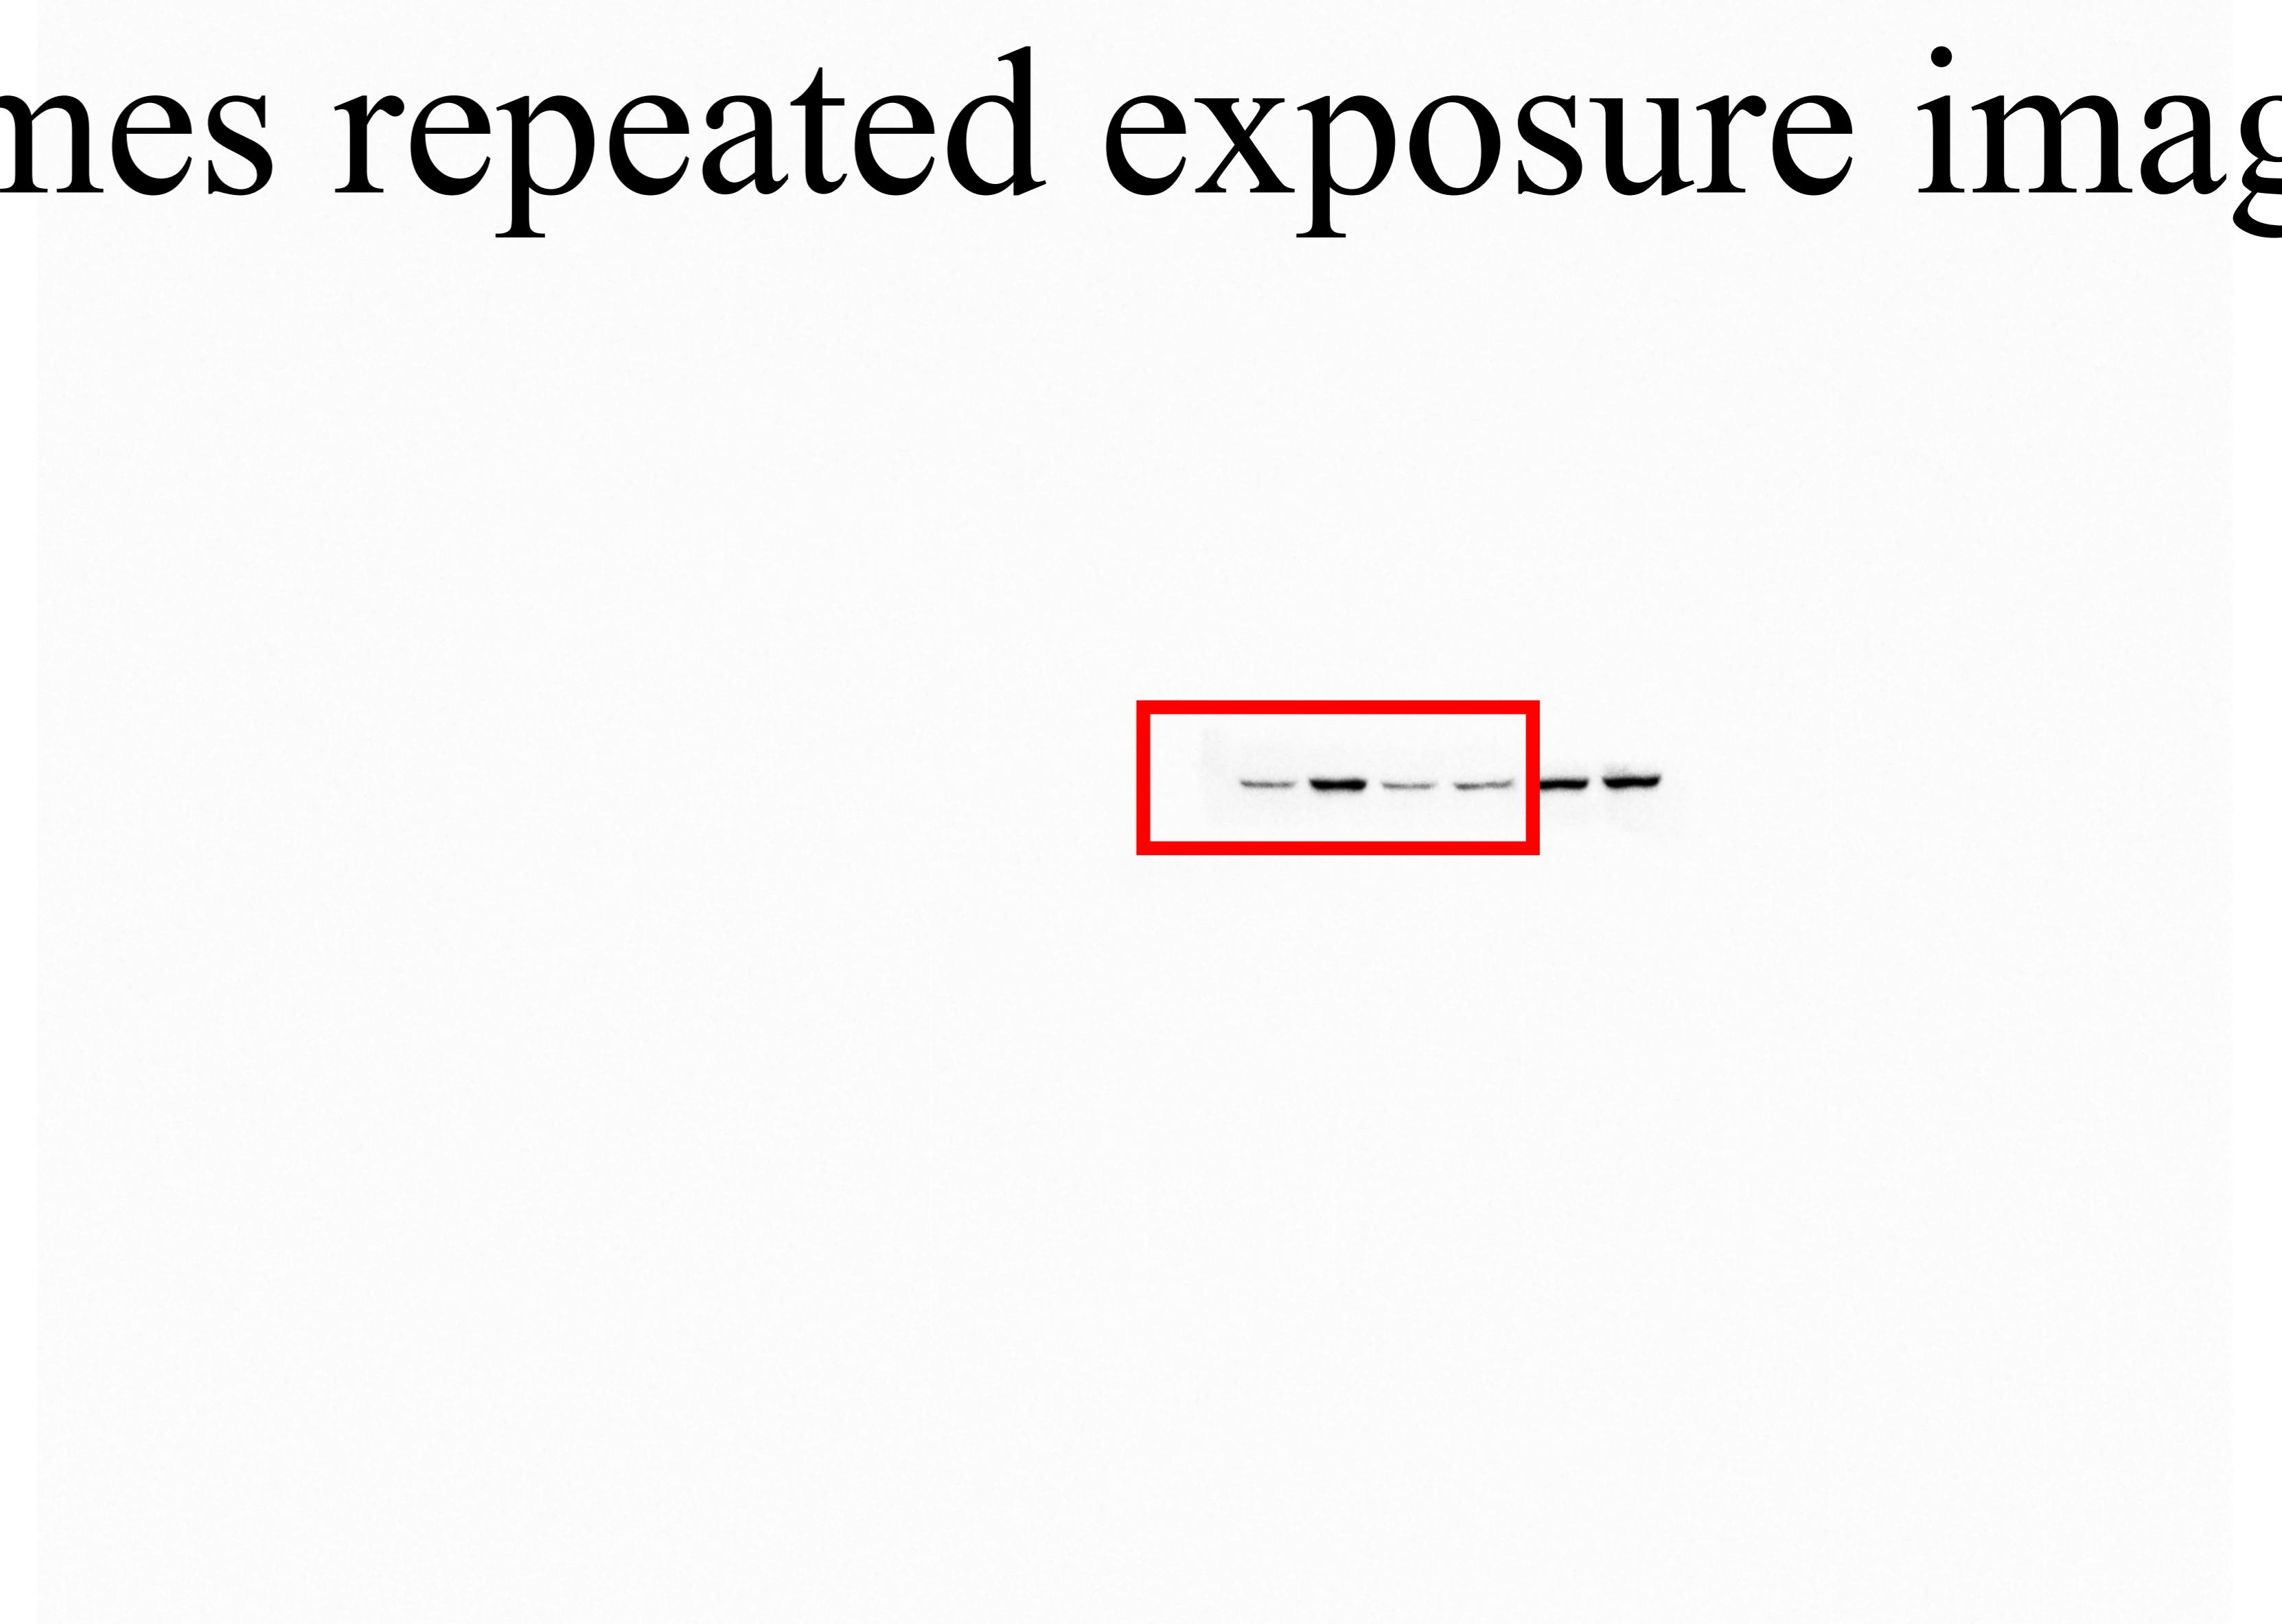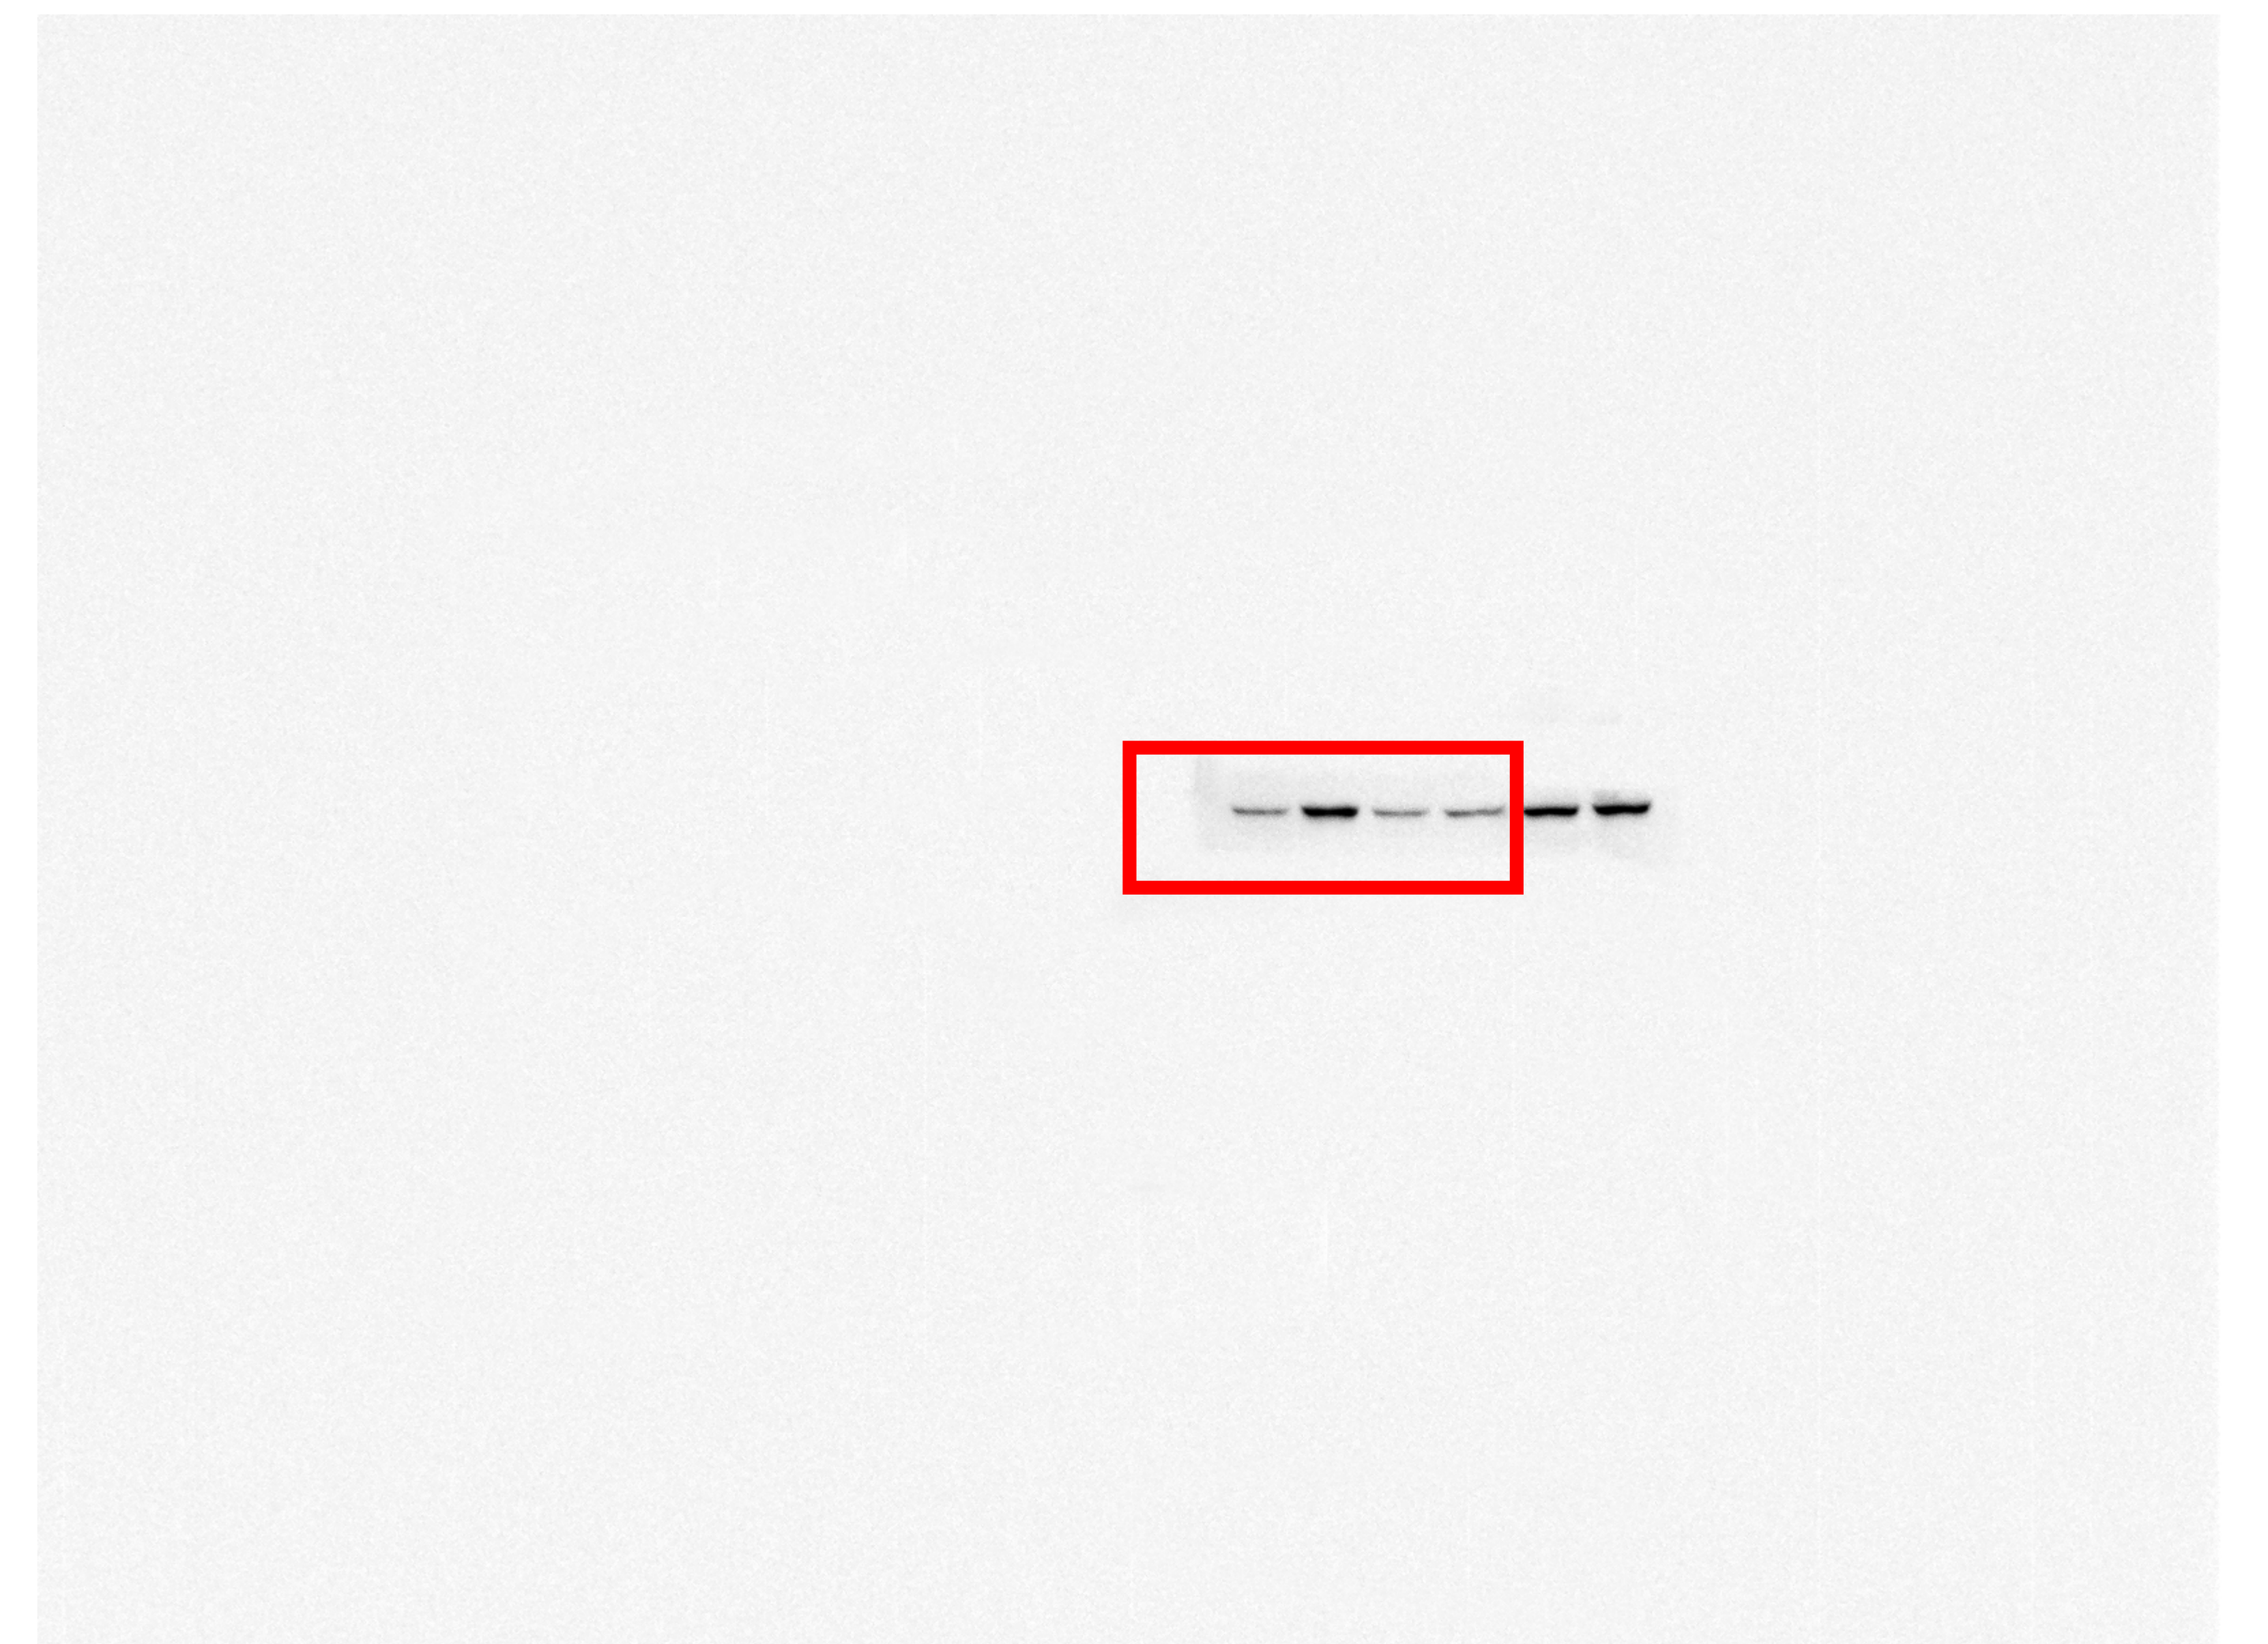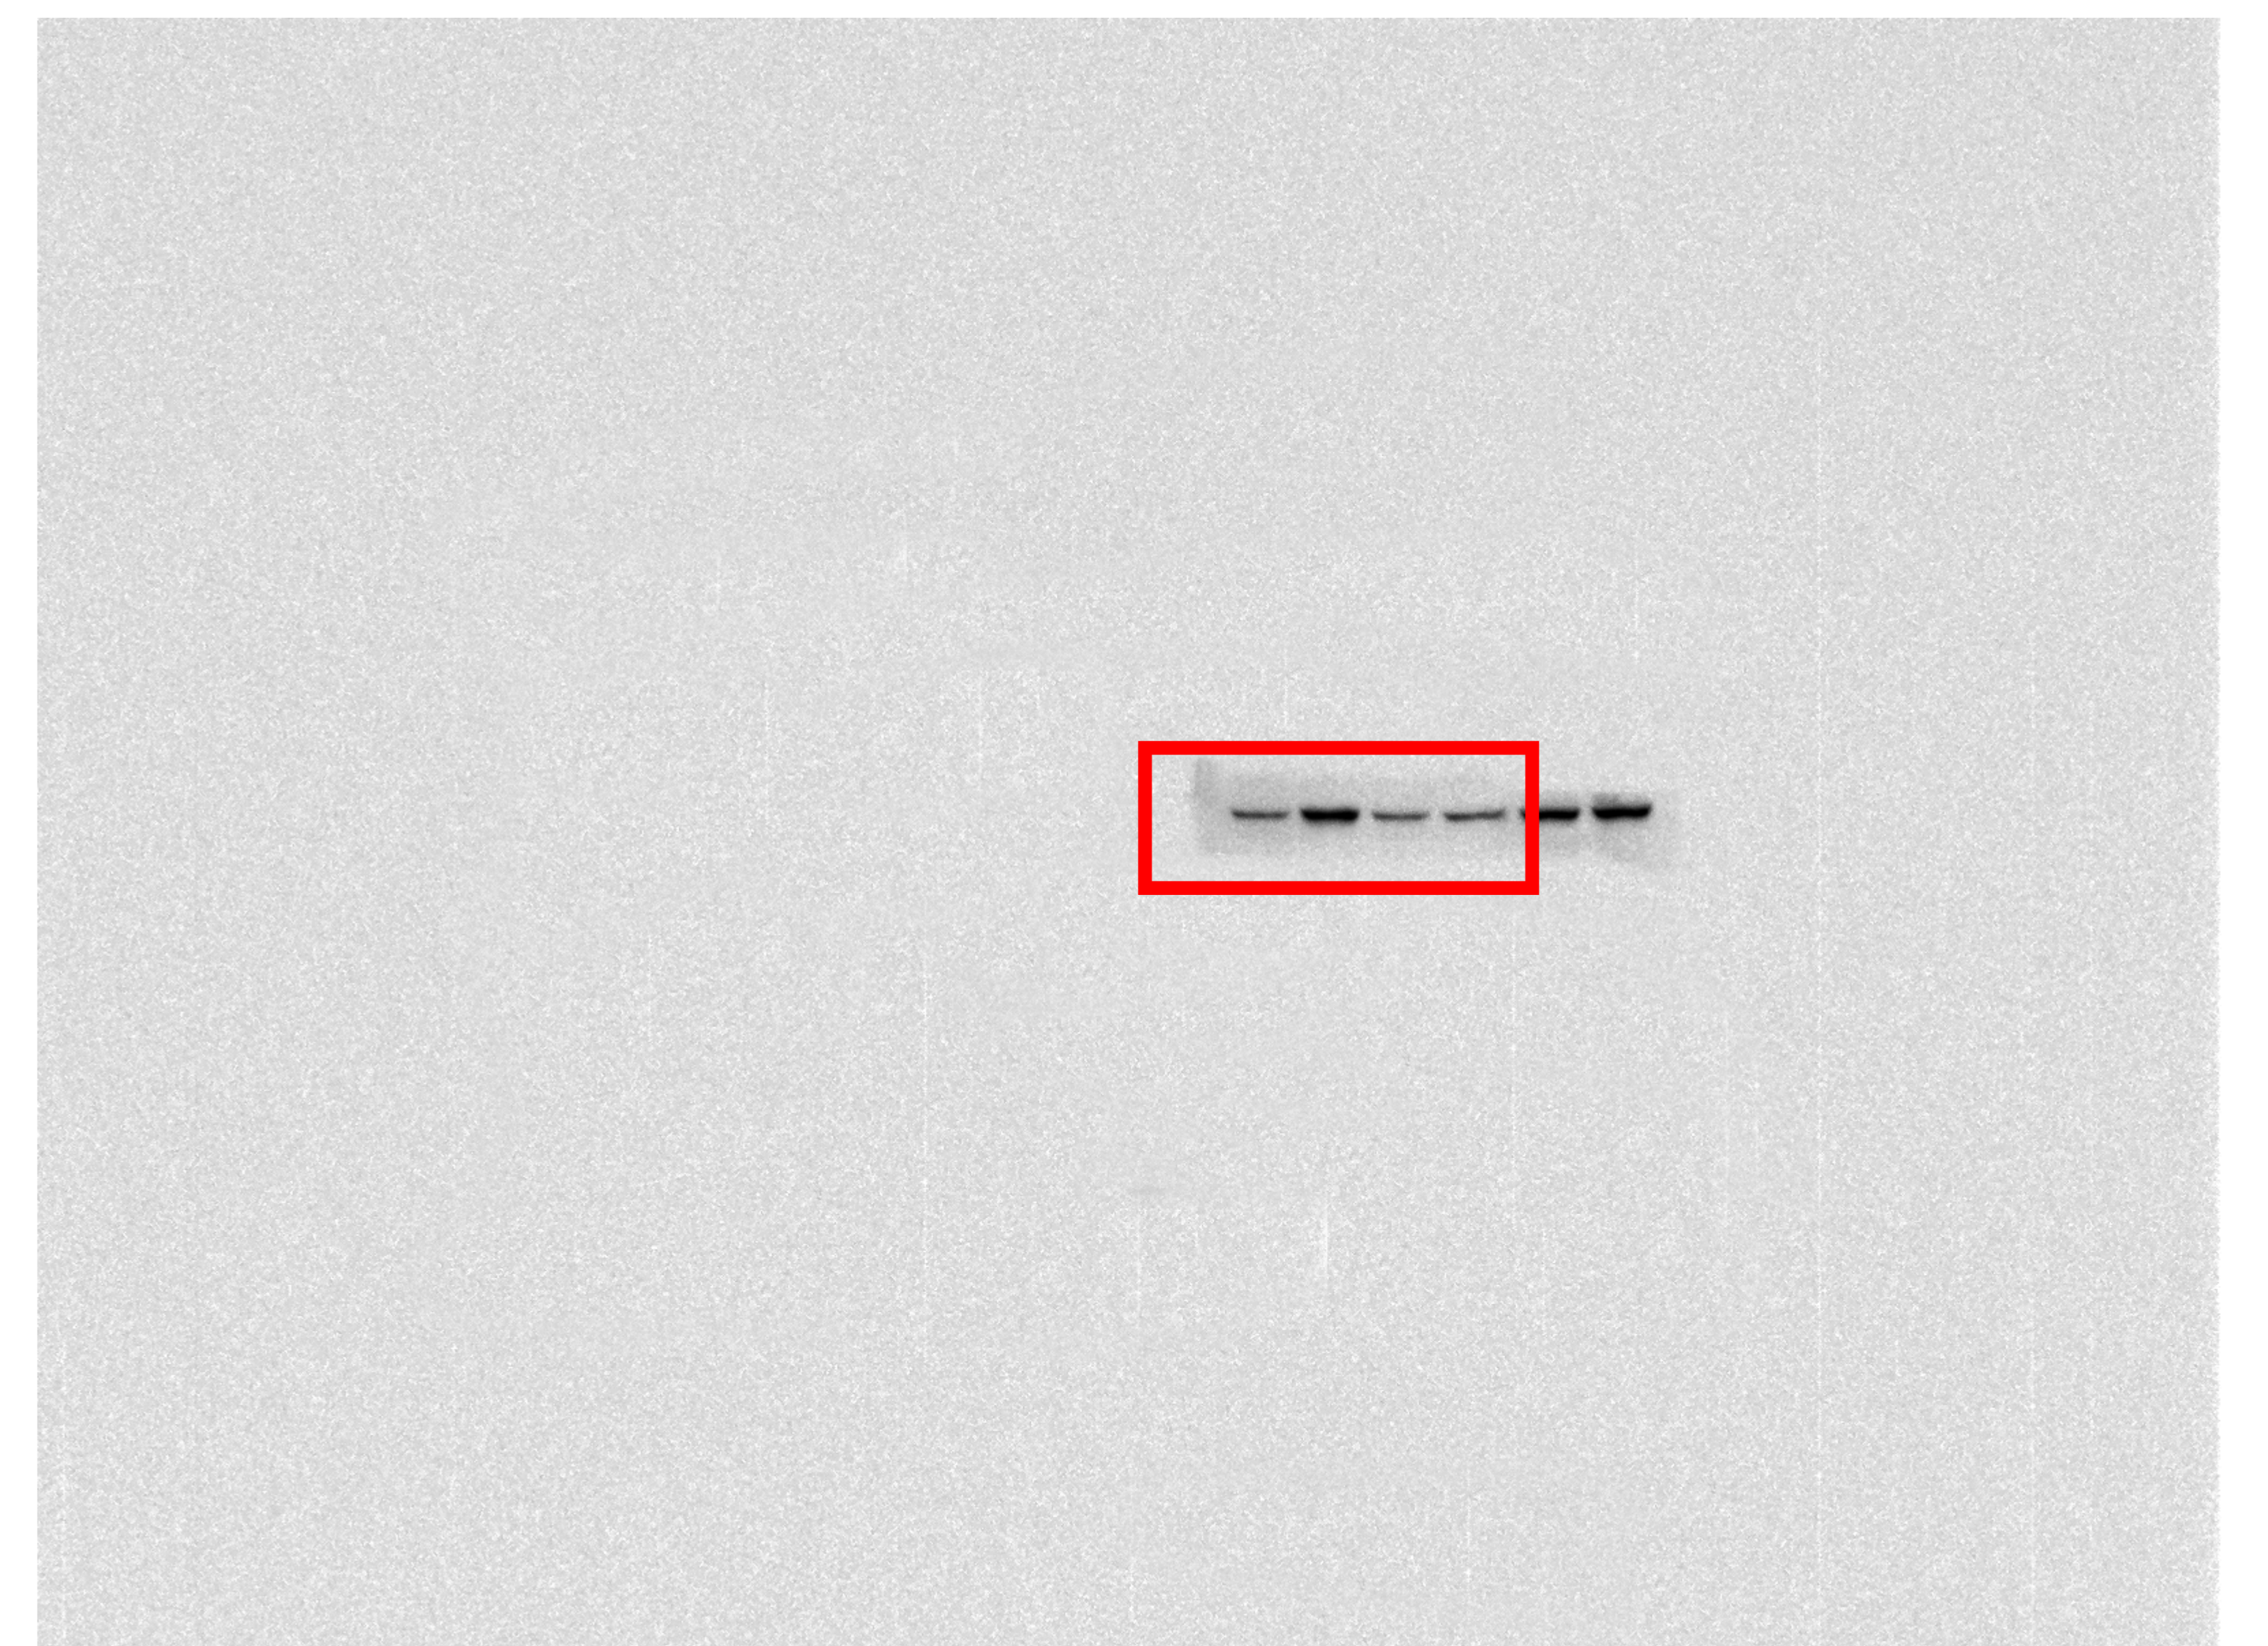

B

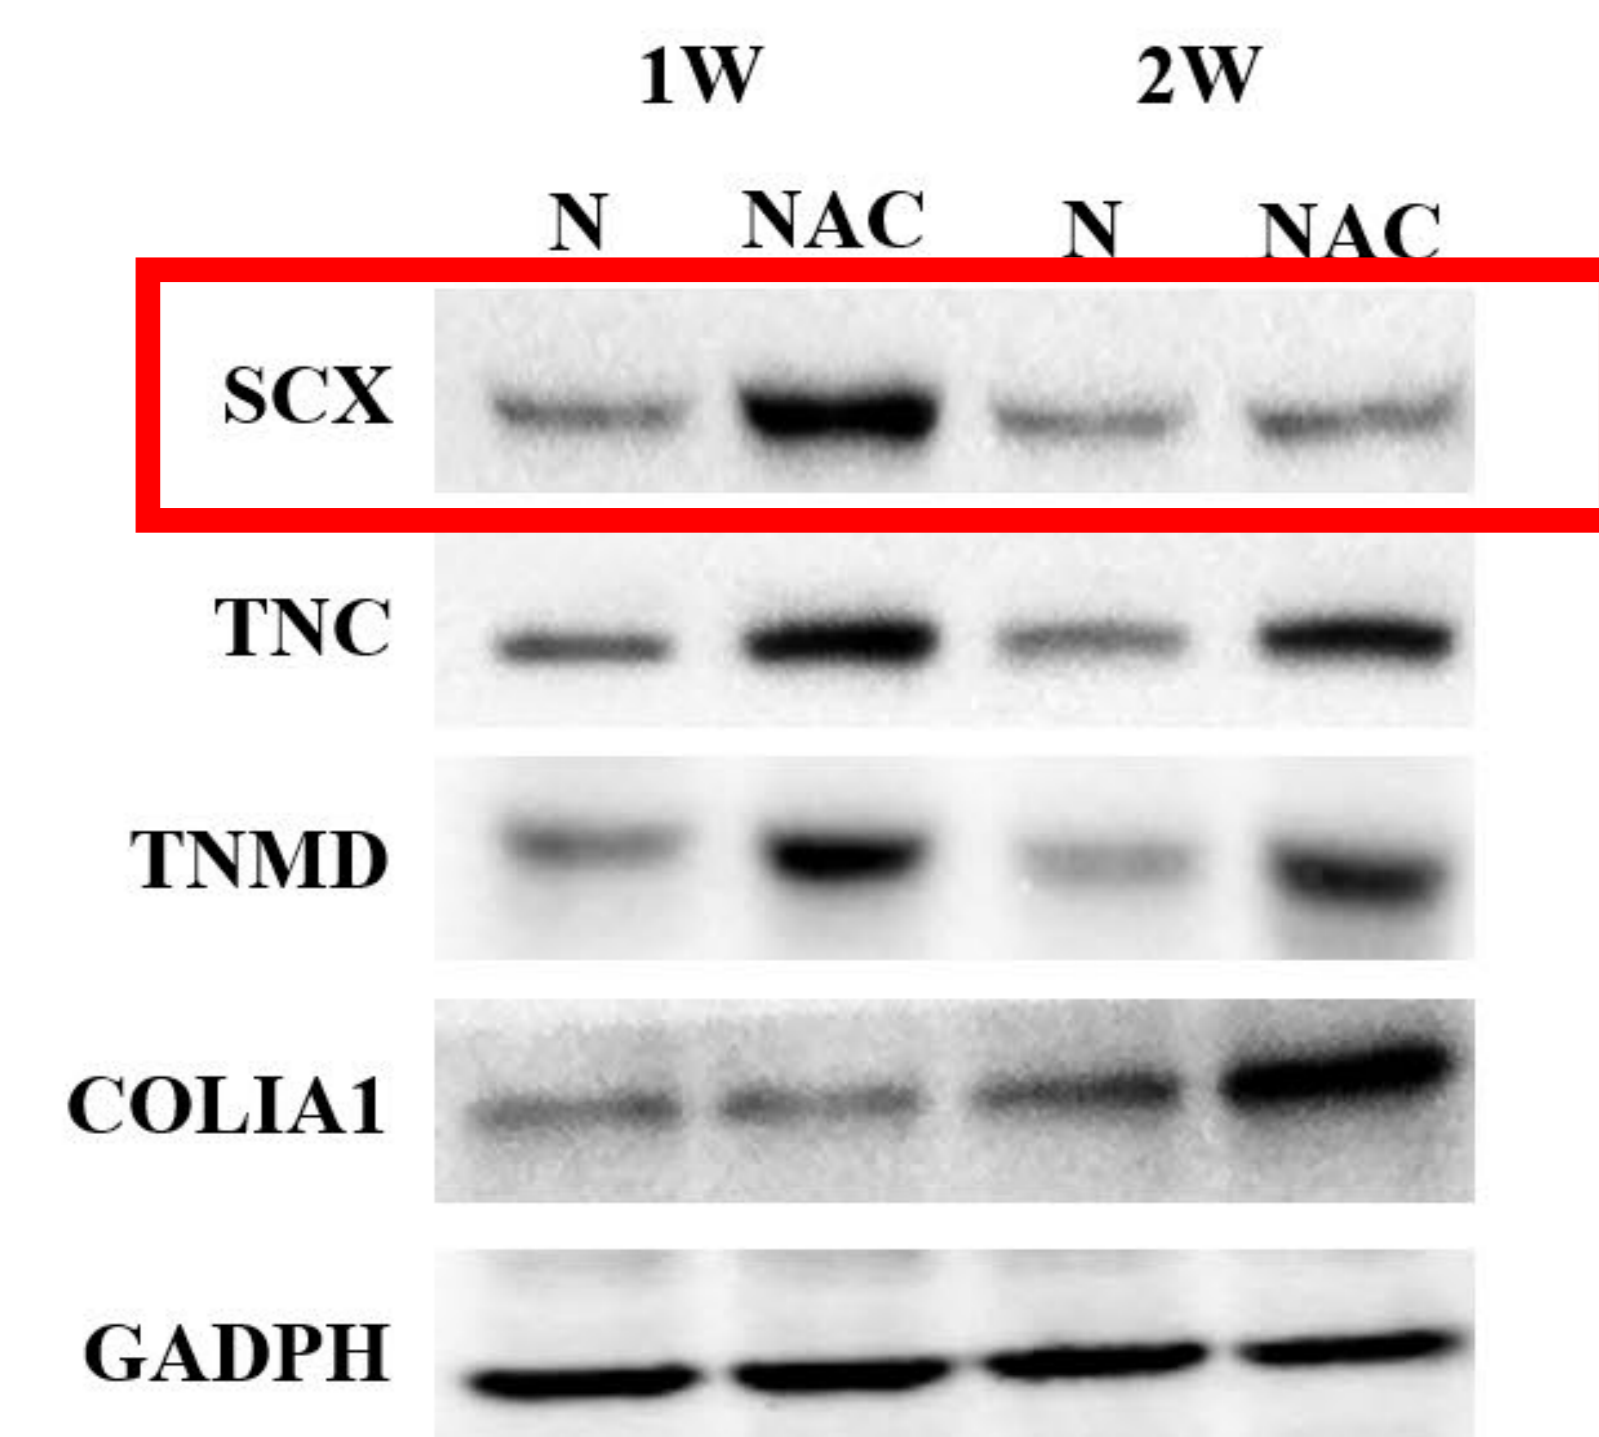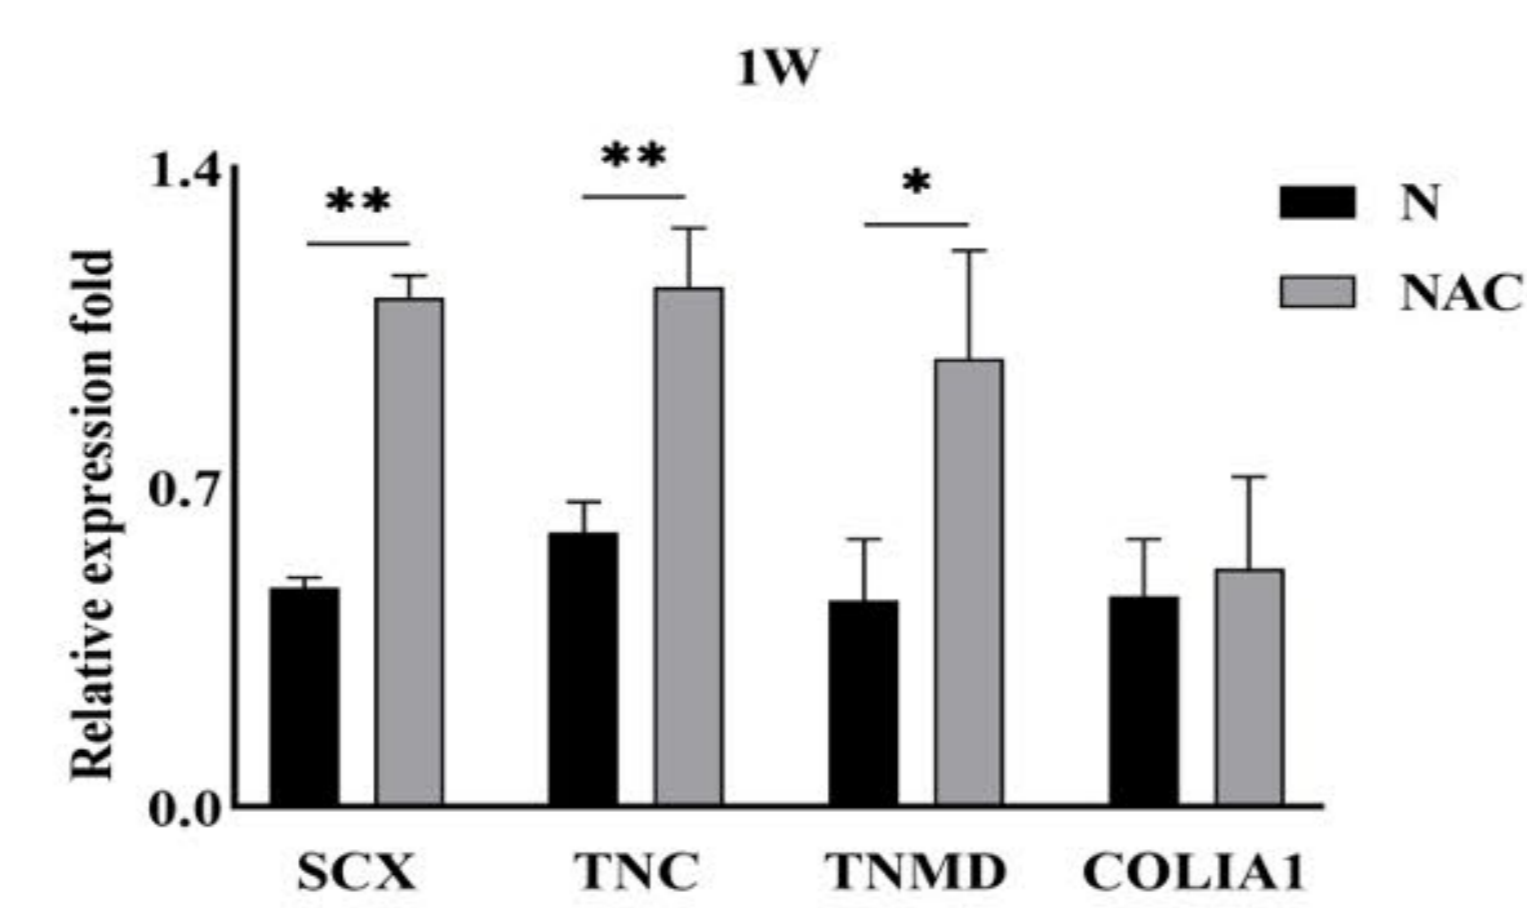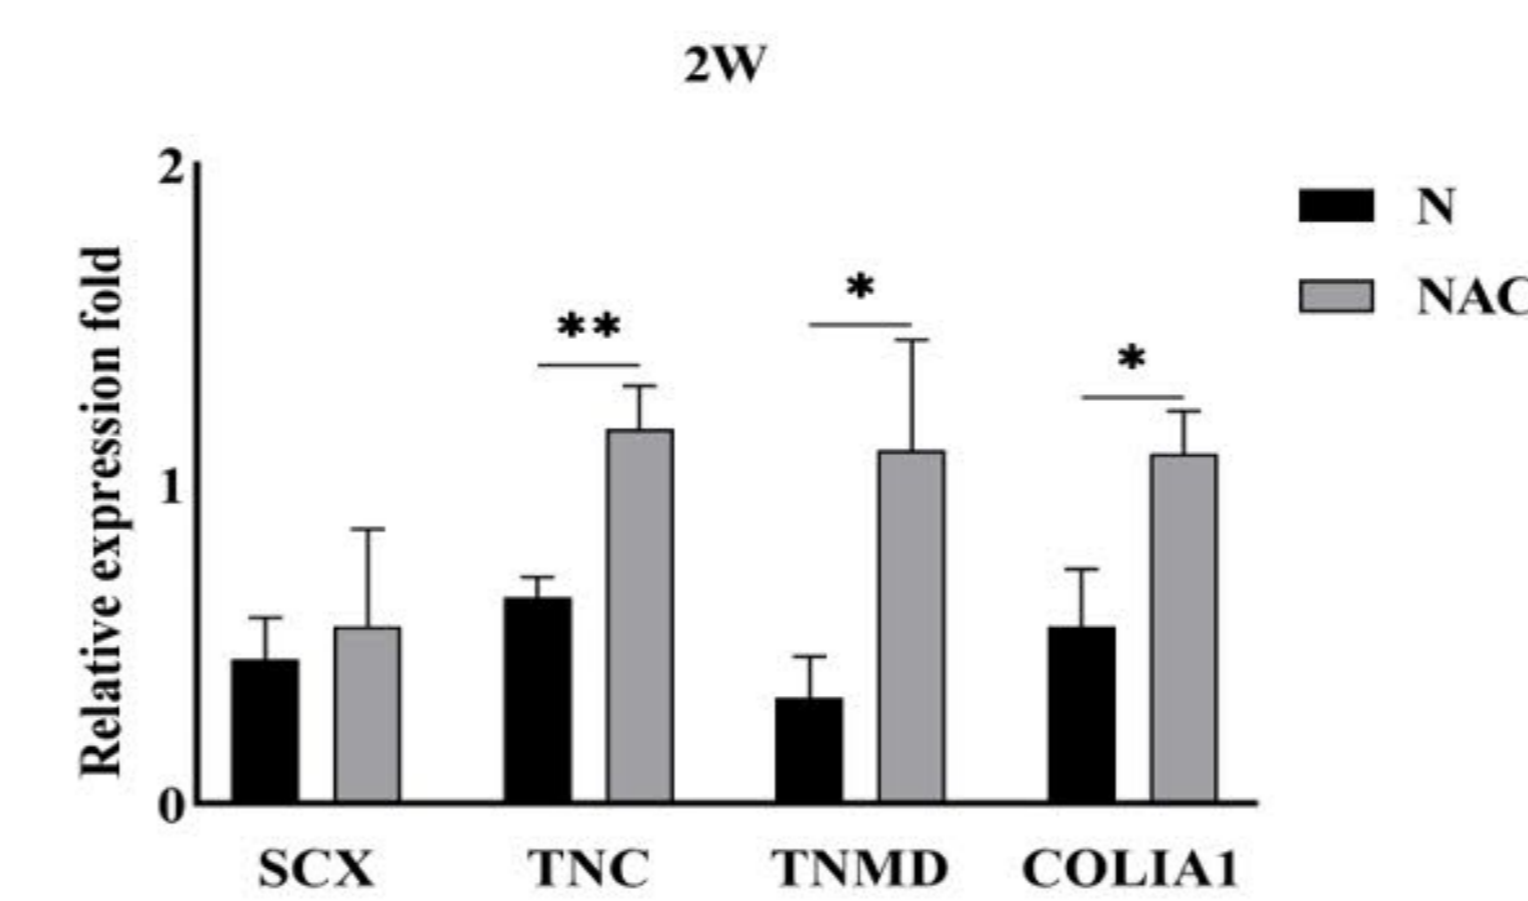

# Fig2B TNC

Three times repeated exposure image

Fig 2

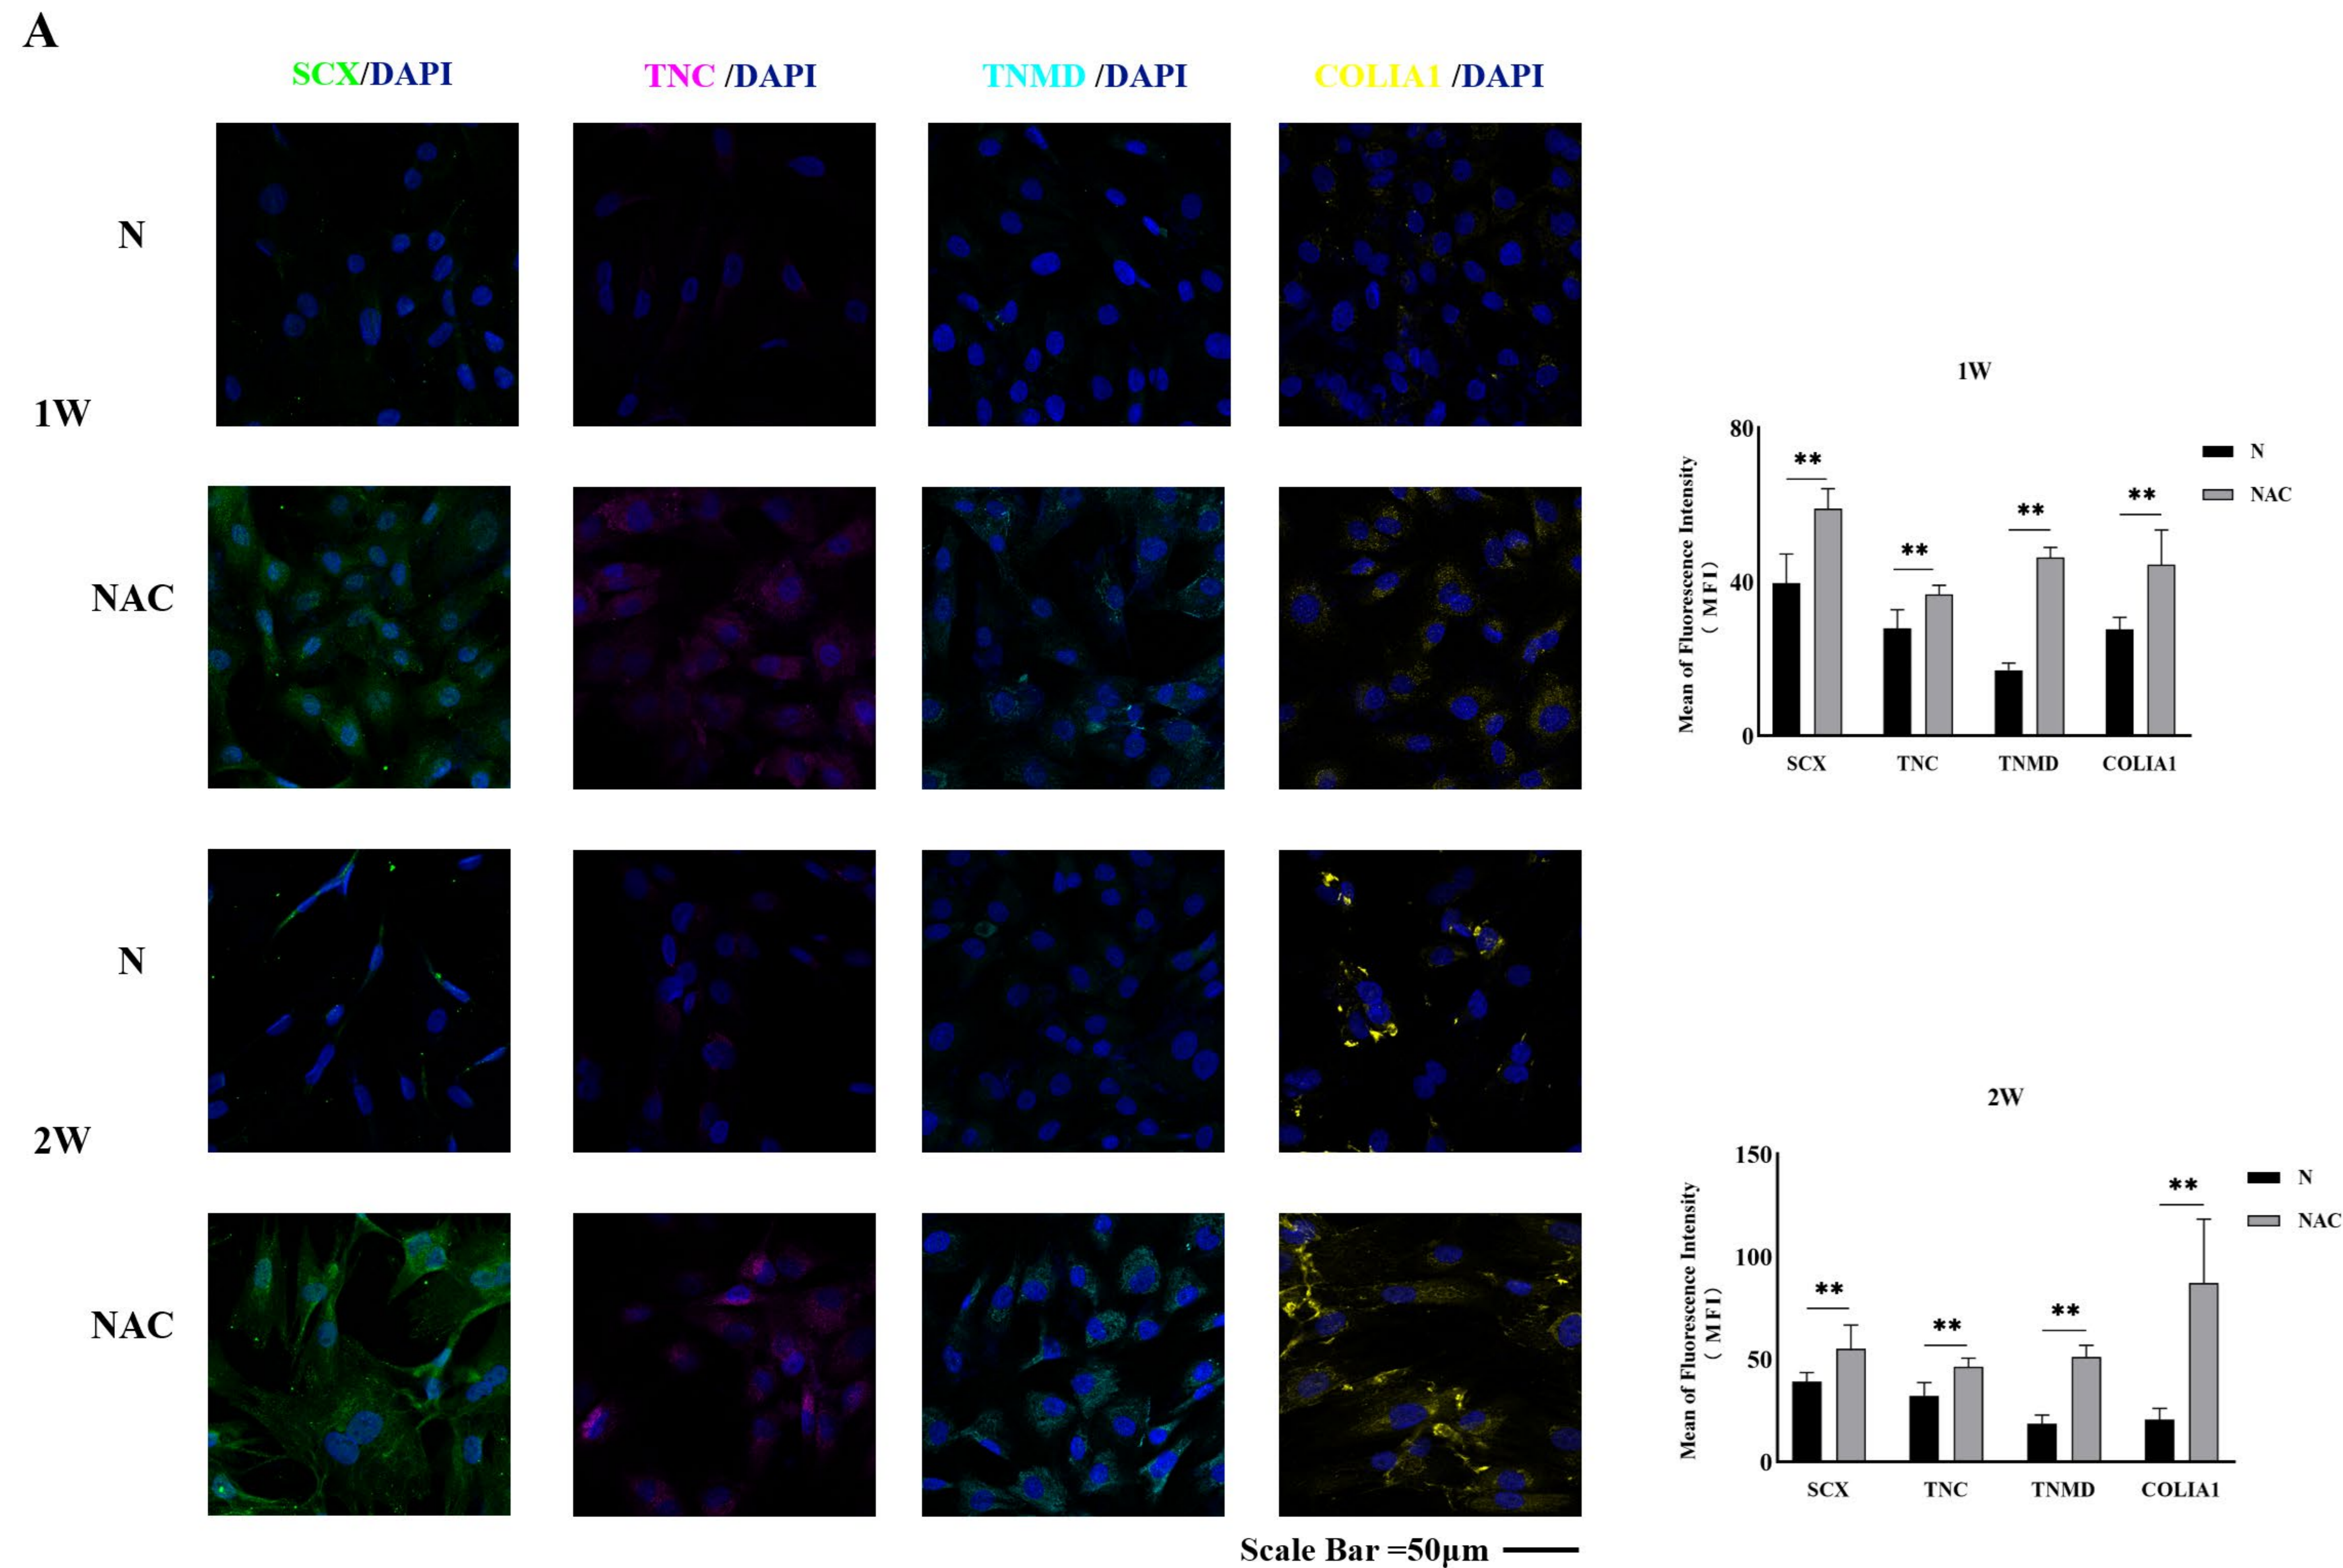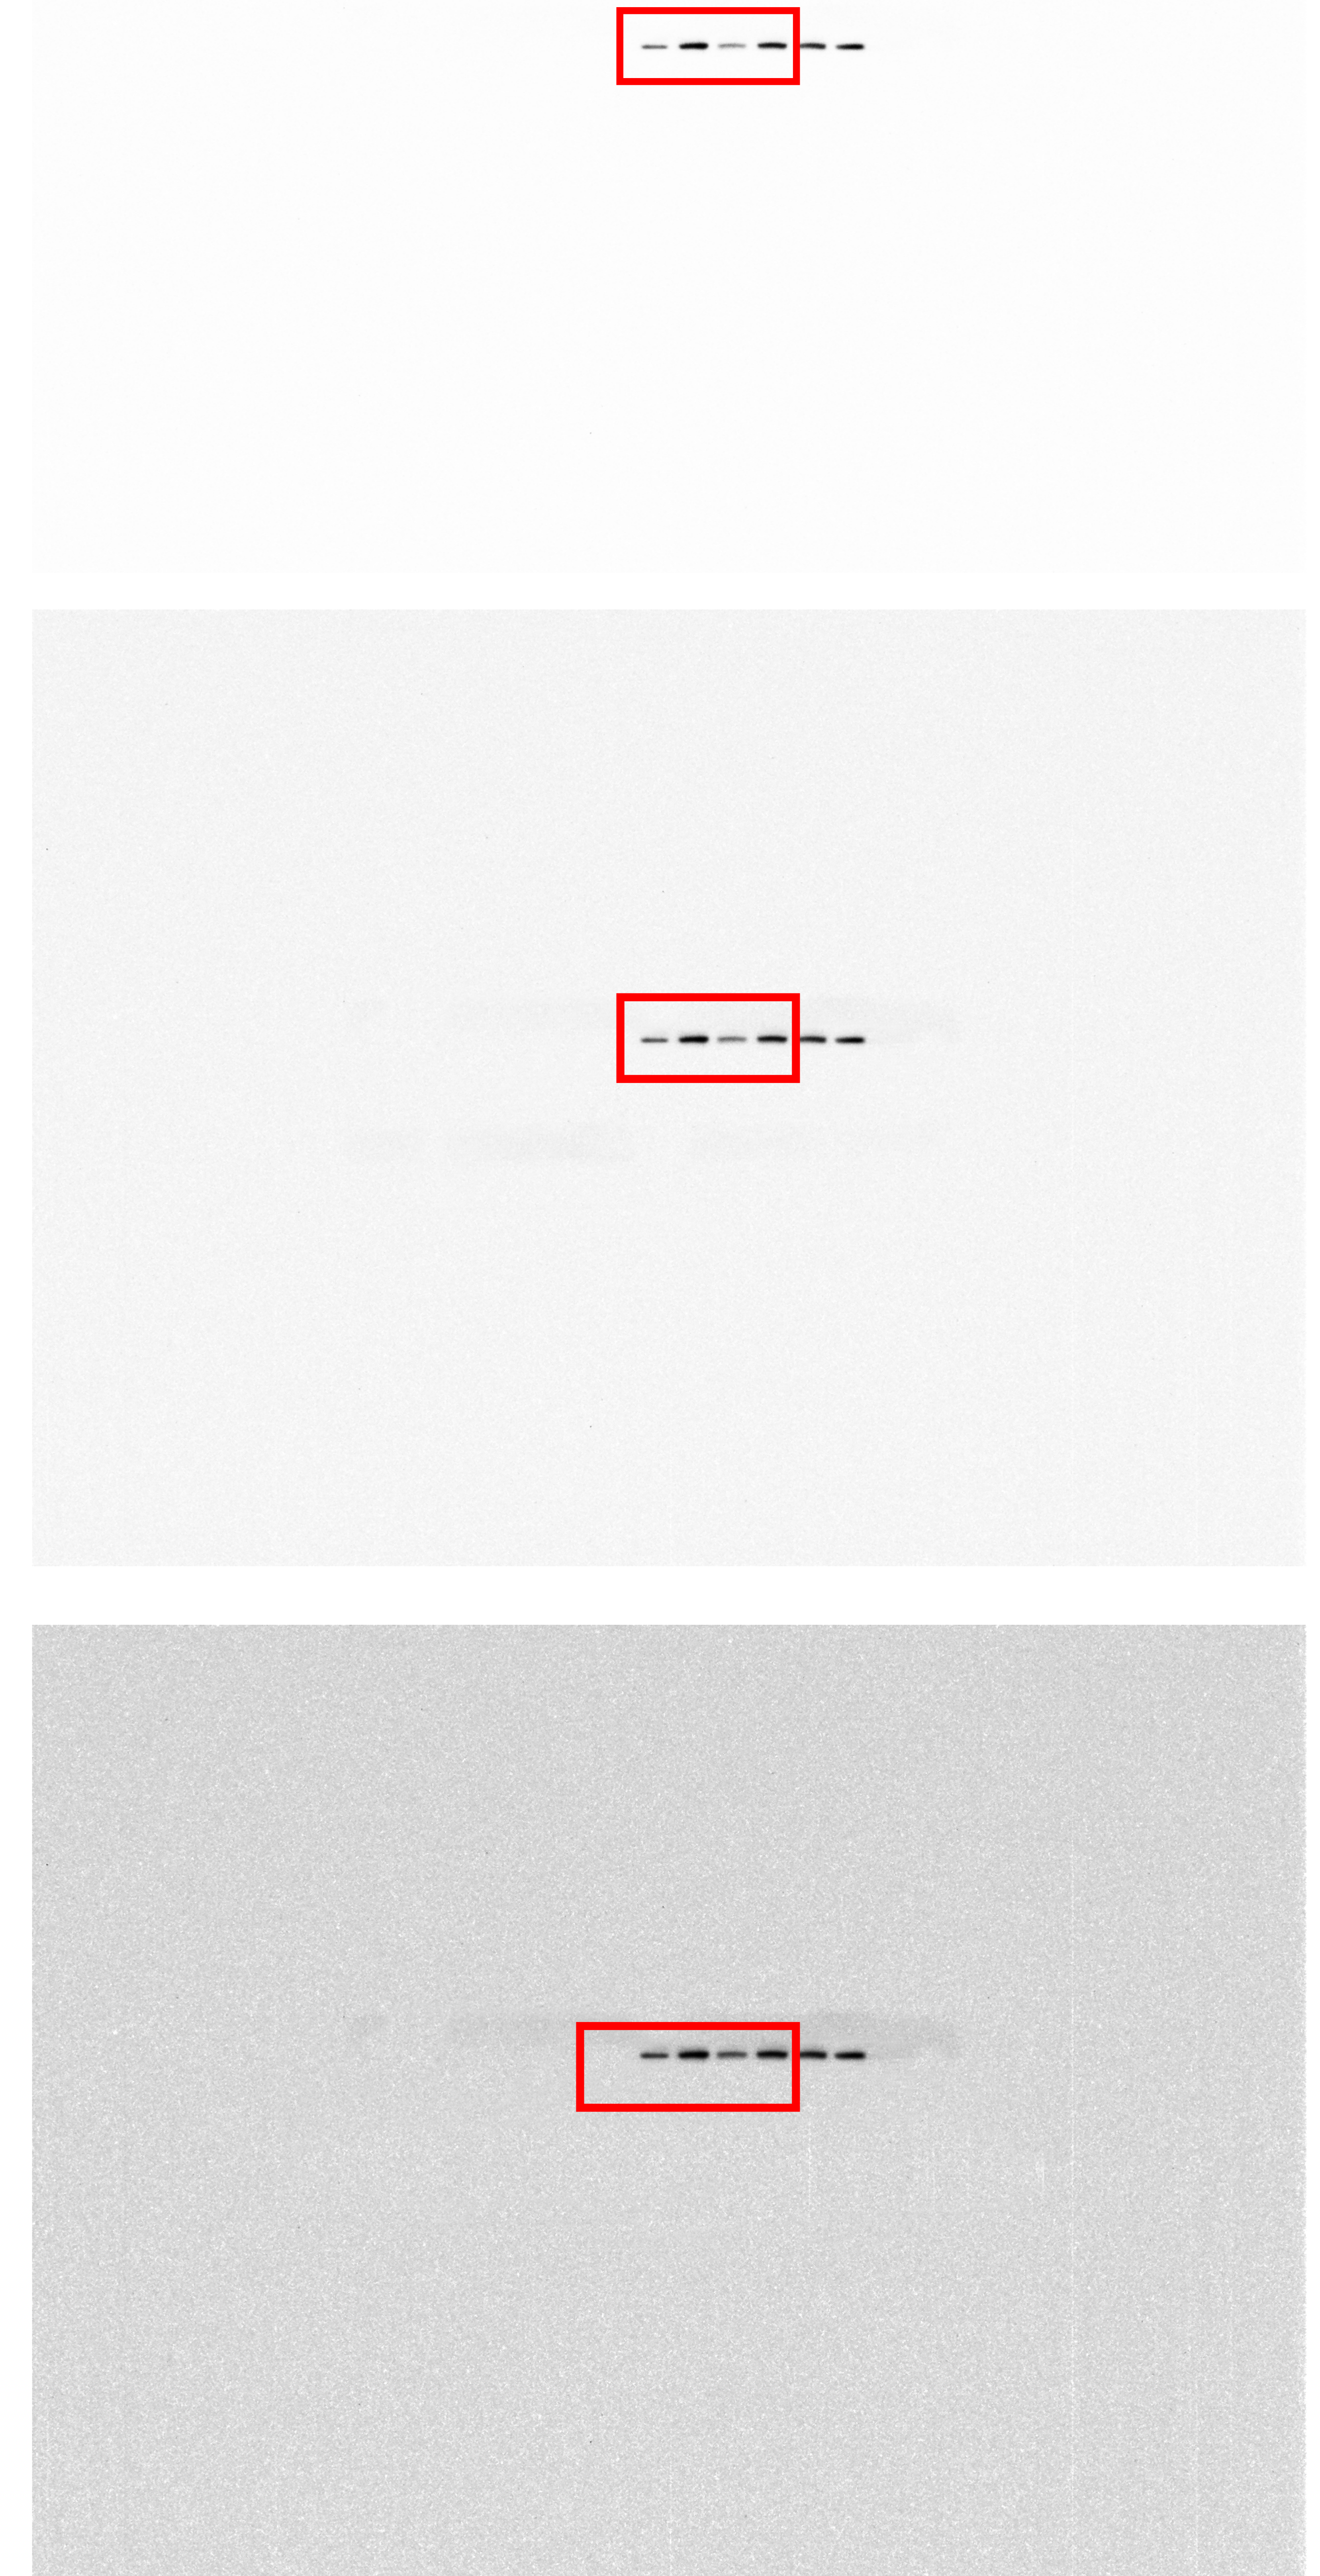

**B**

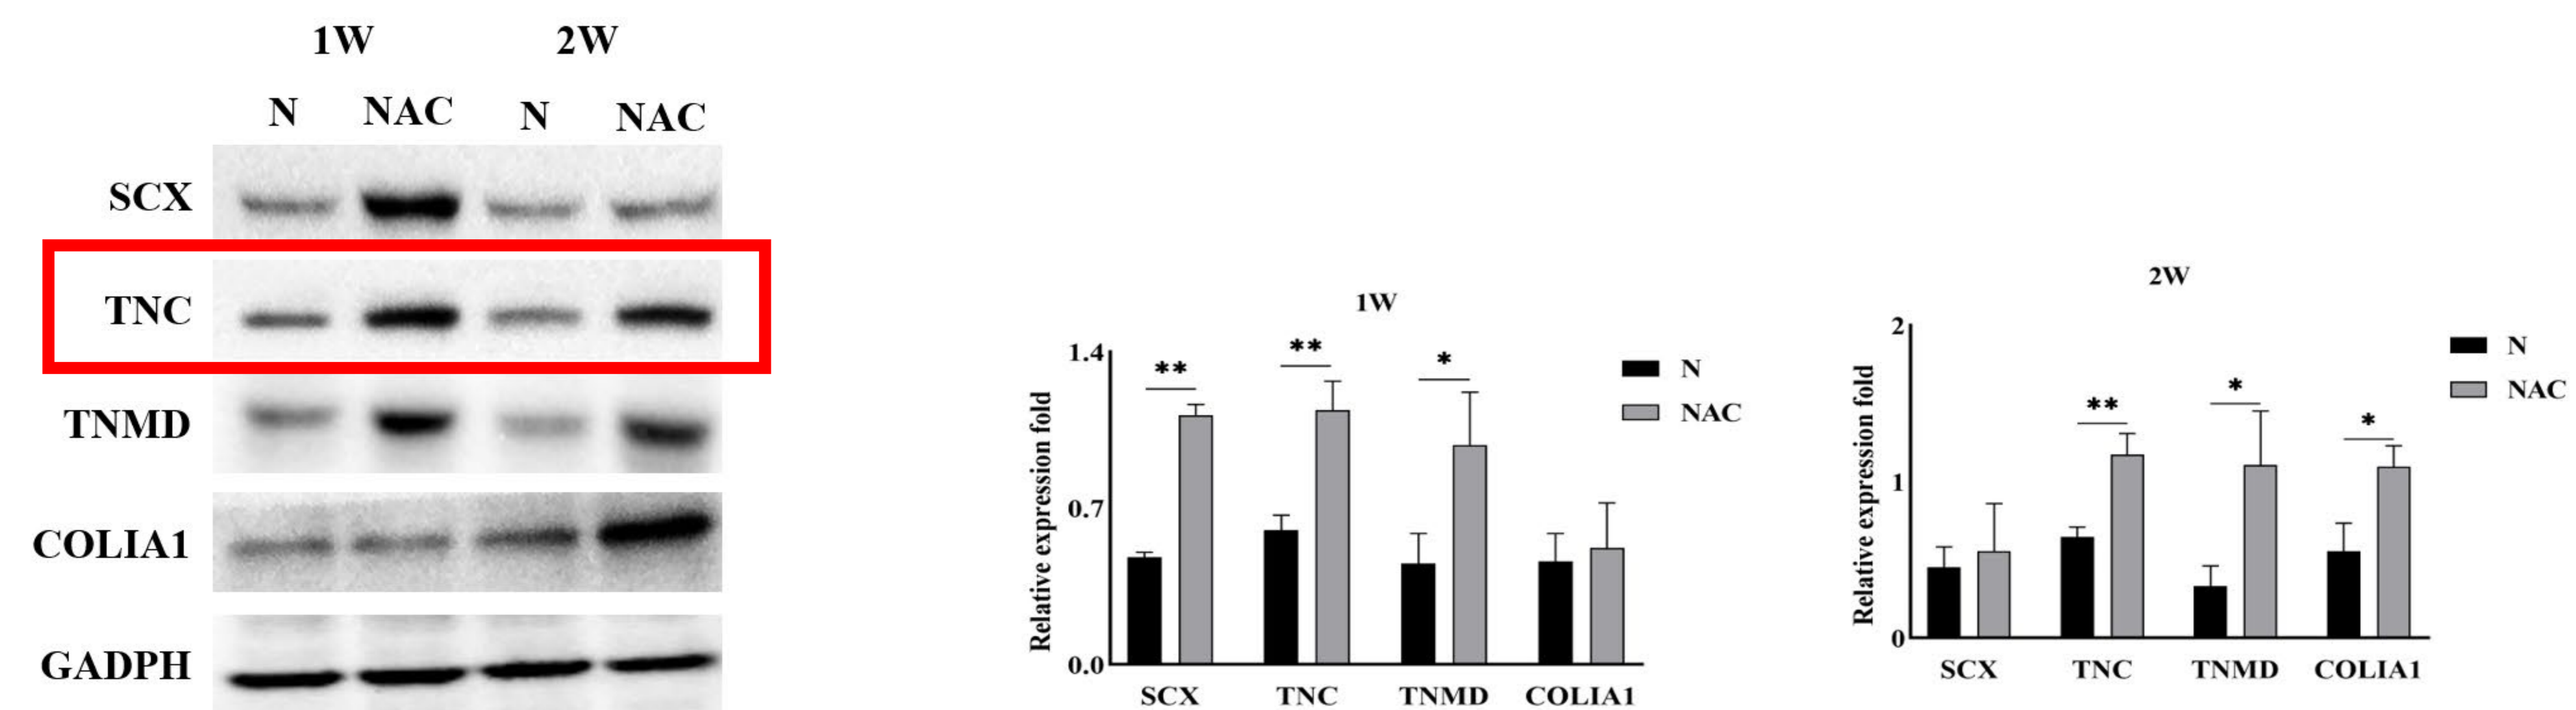

# Fig2B TNMD

Three times repeated exposure image

Fig 2

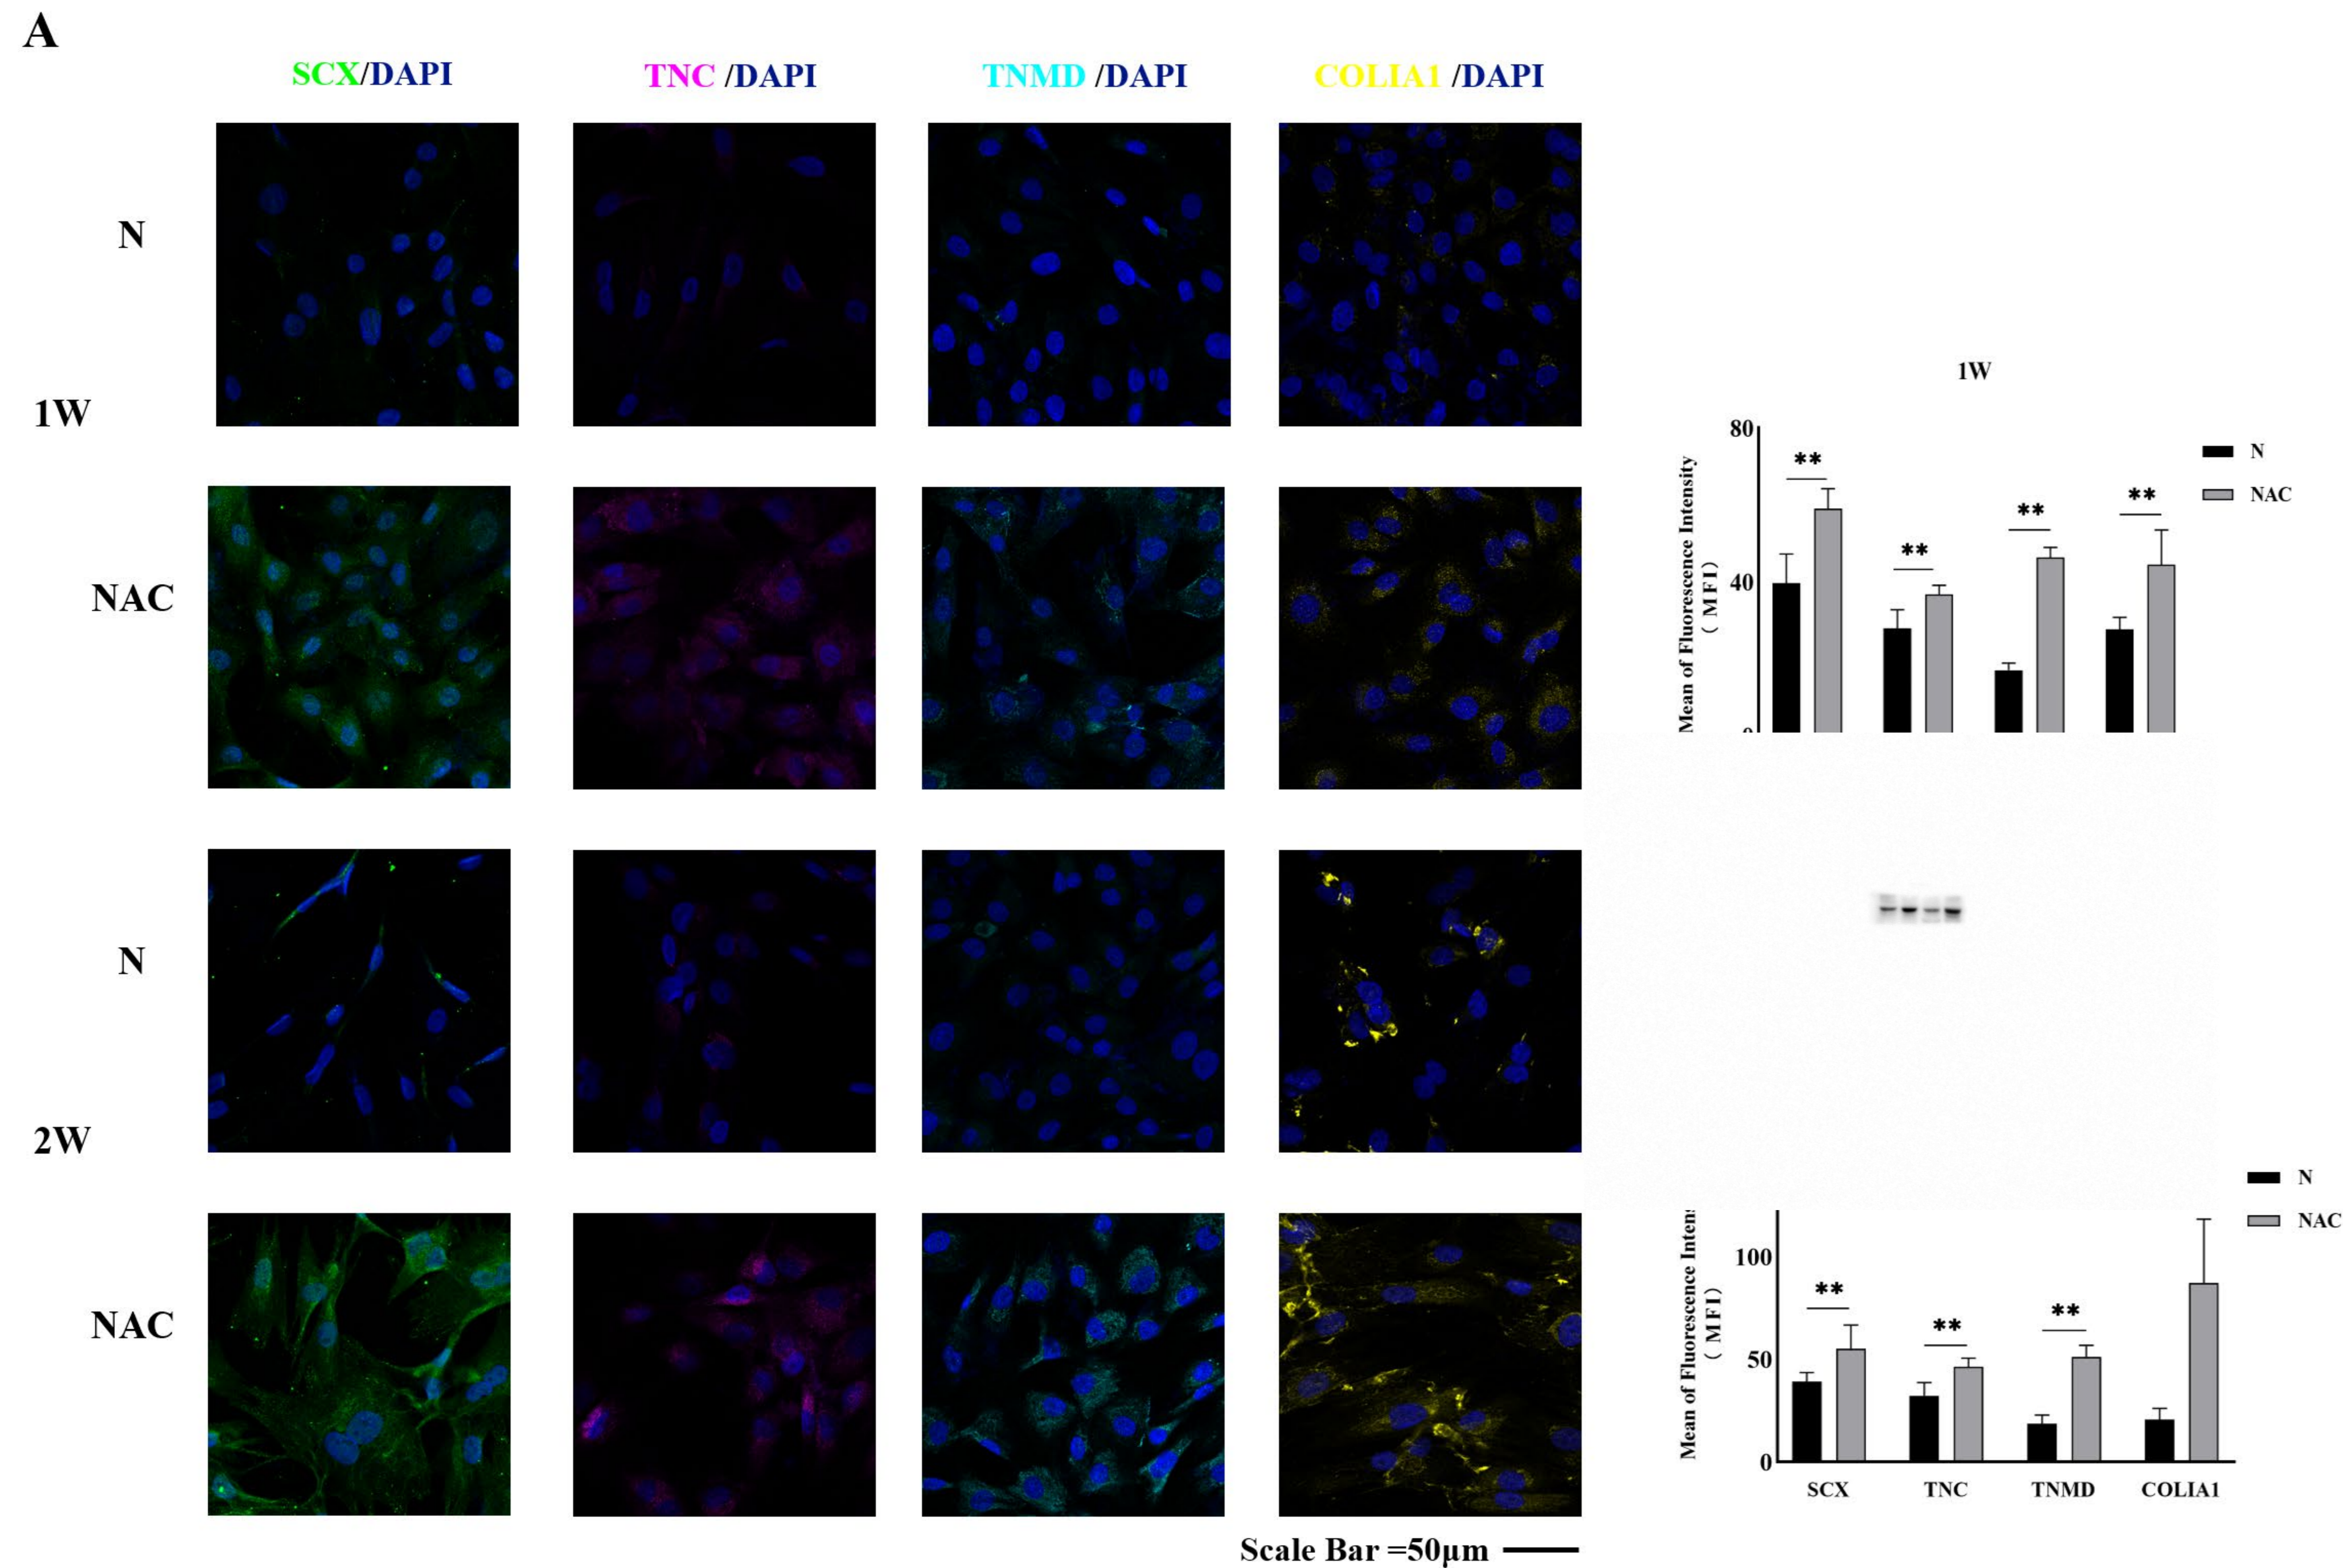

**B**

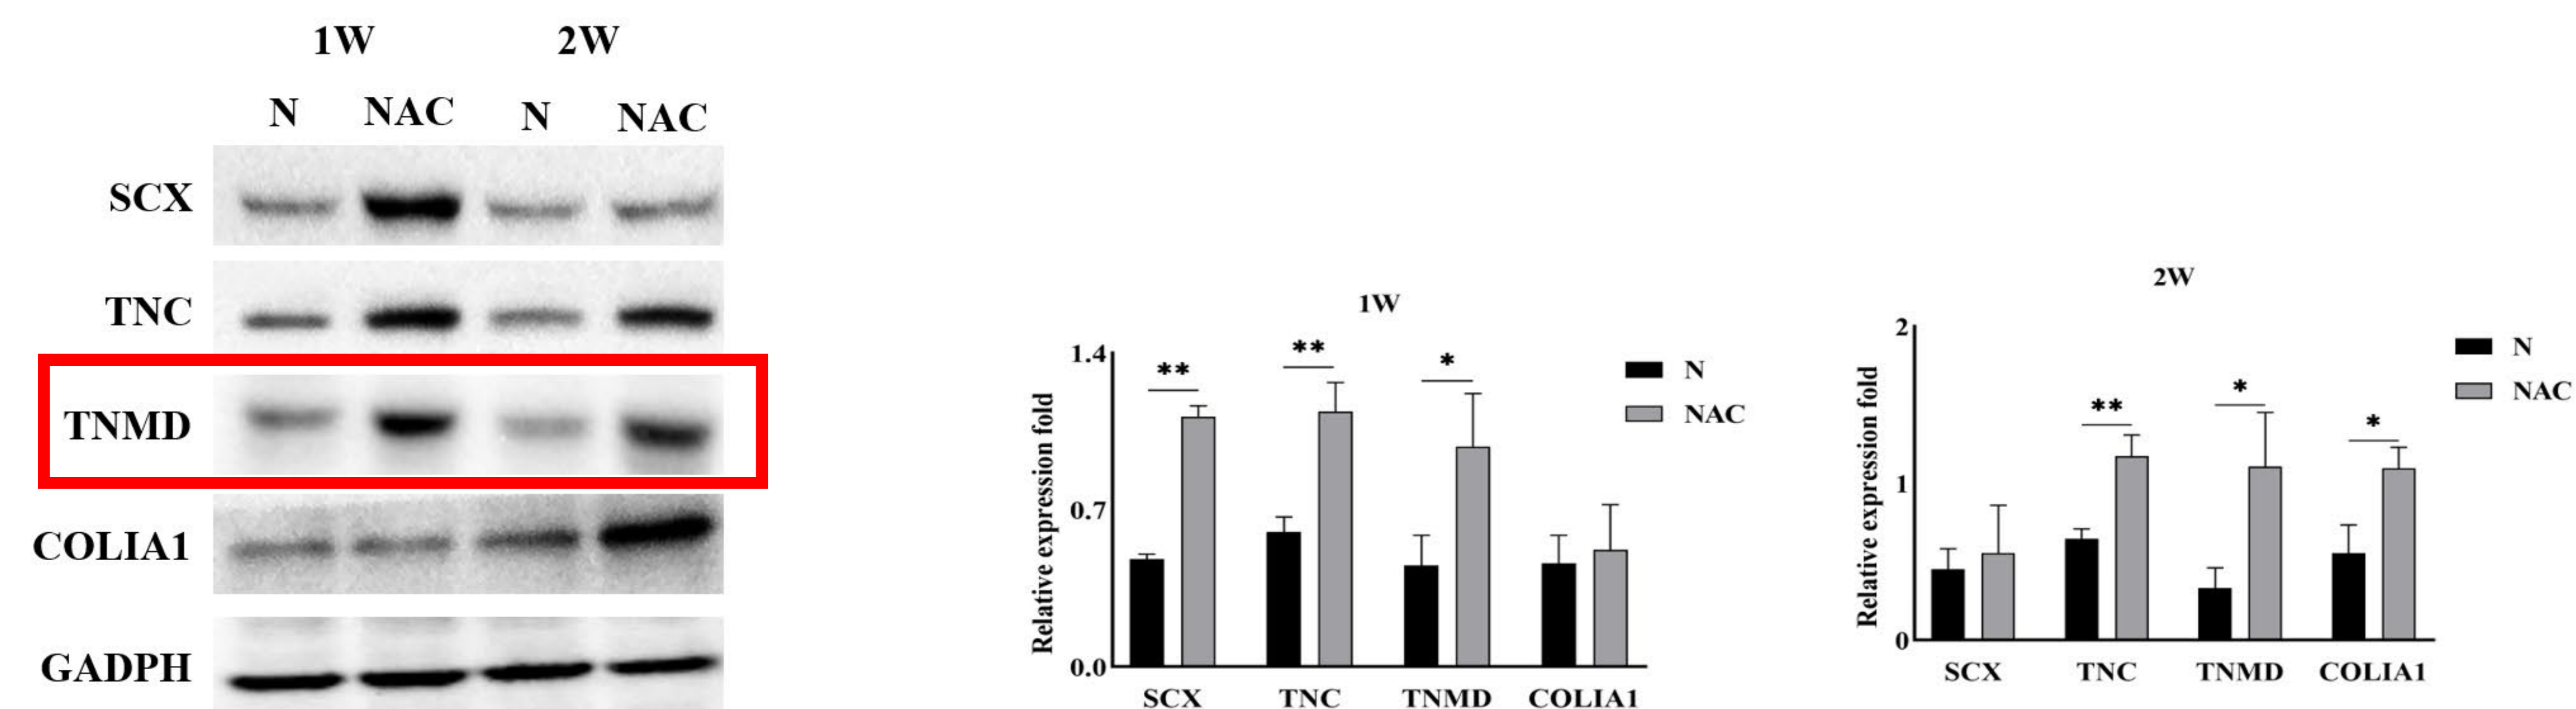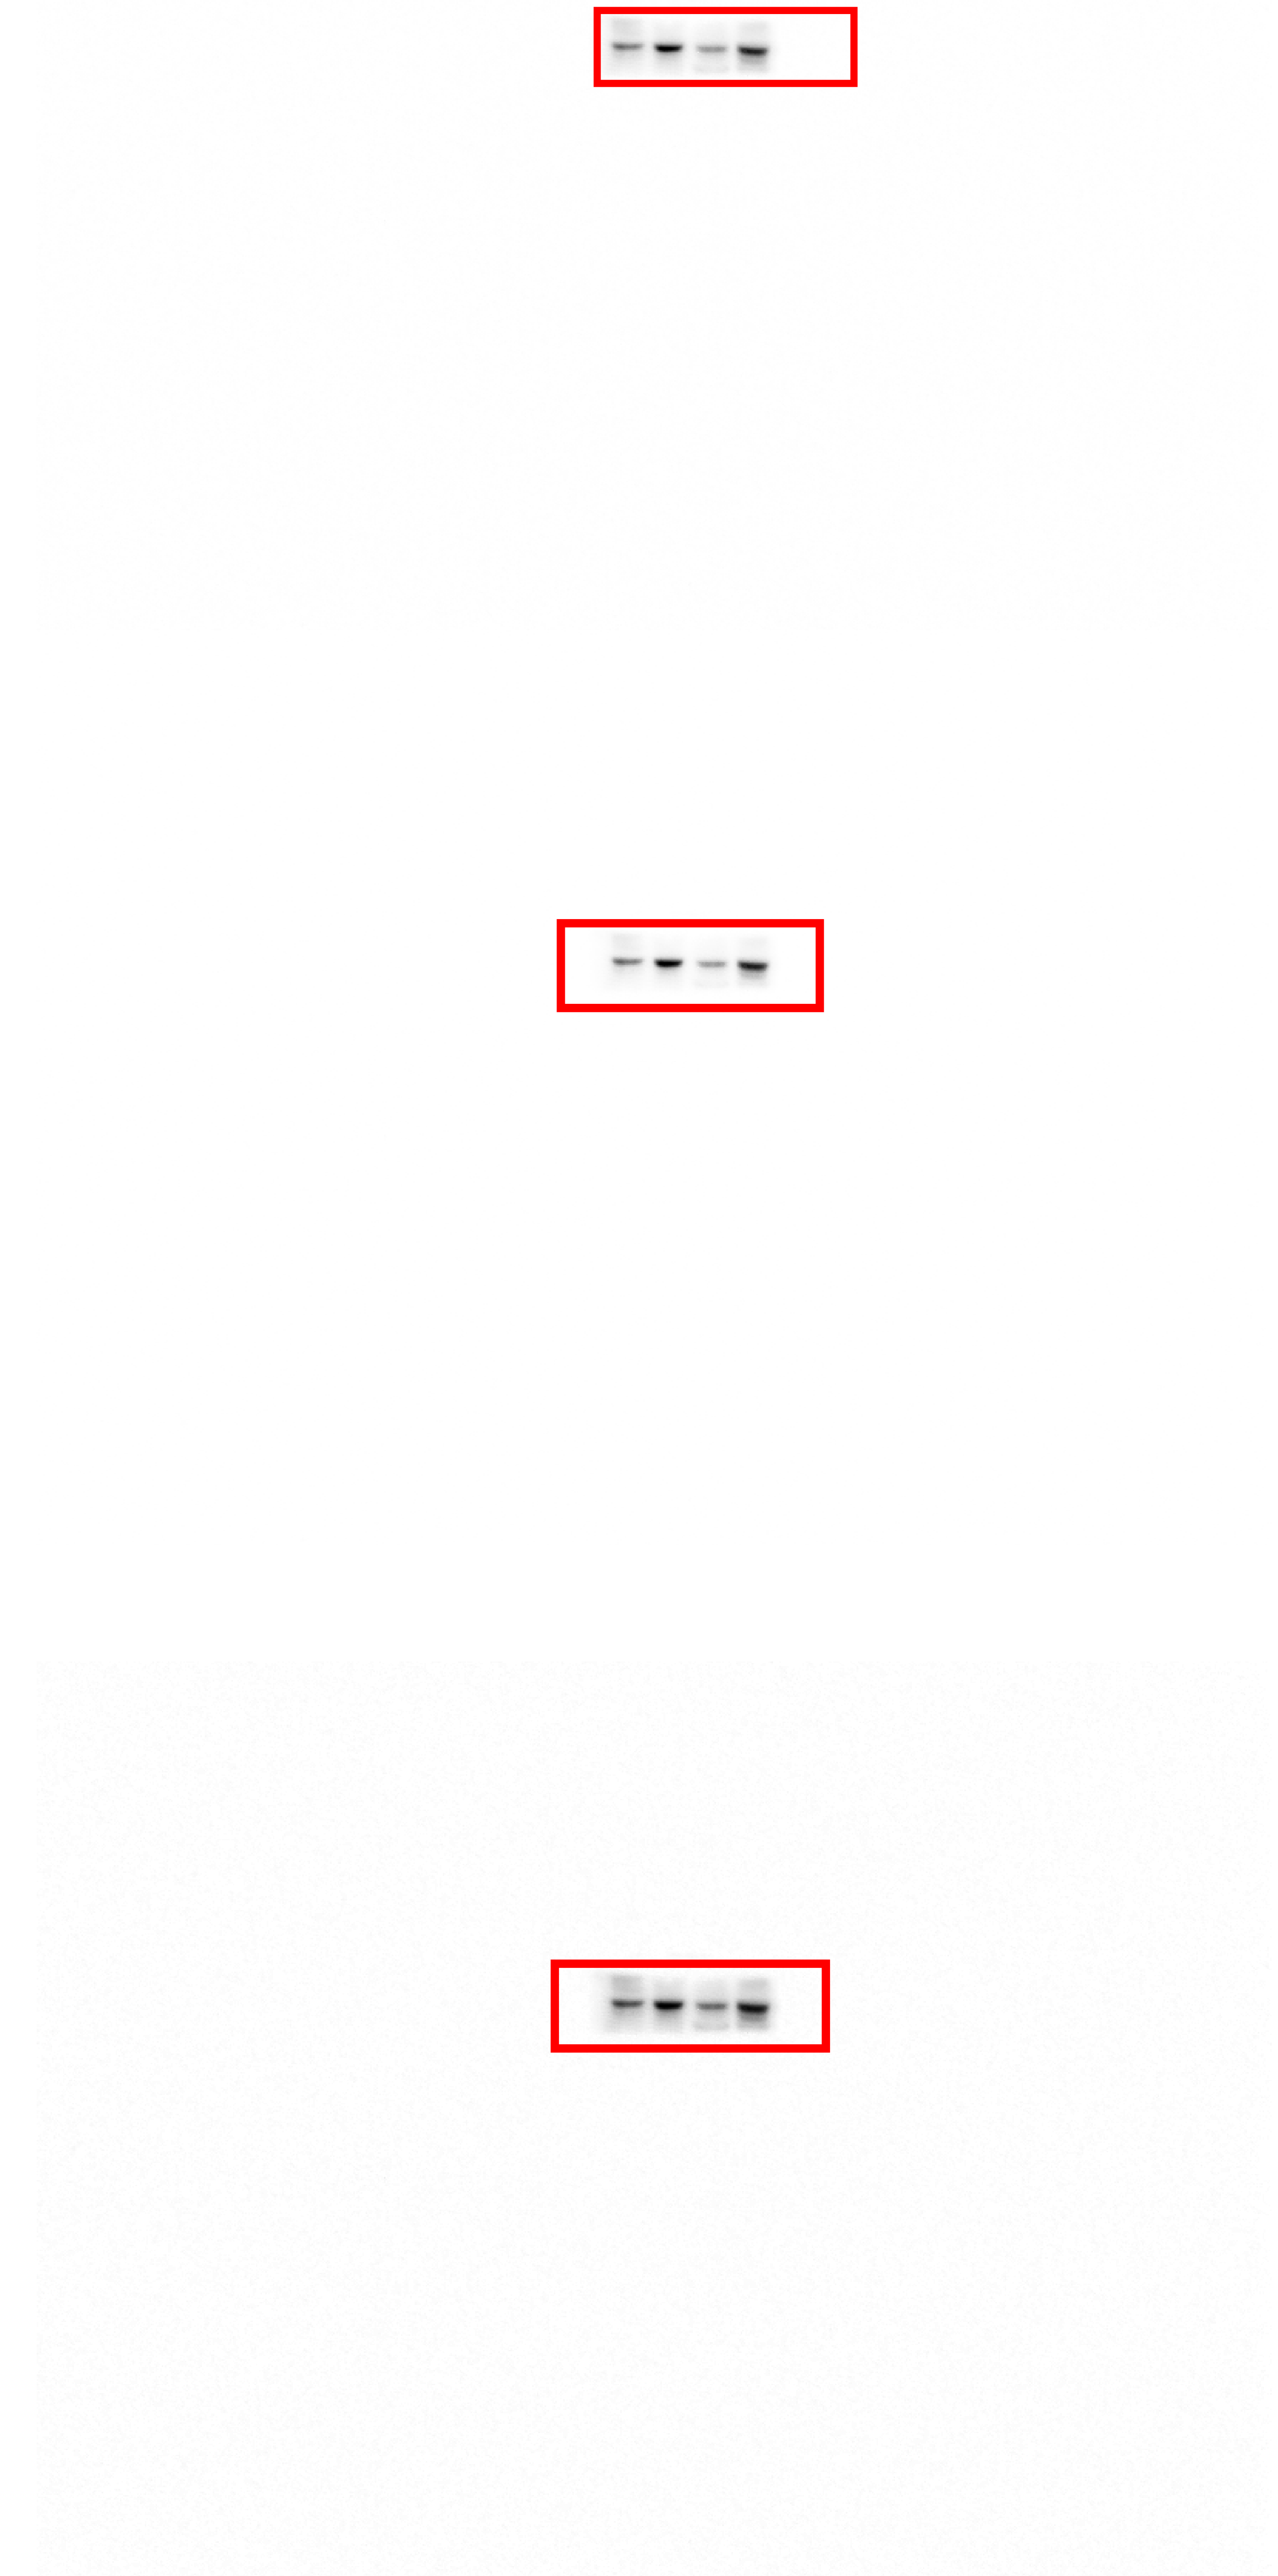

# Fig2B COLIA1

Three times repeated exposure image

Fig 2

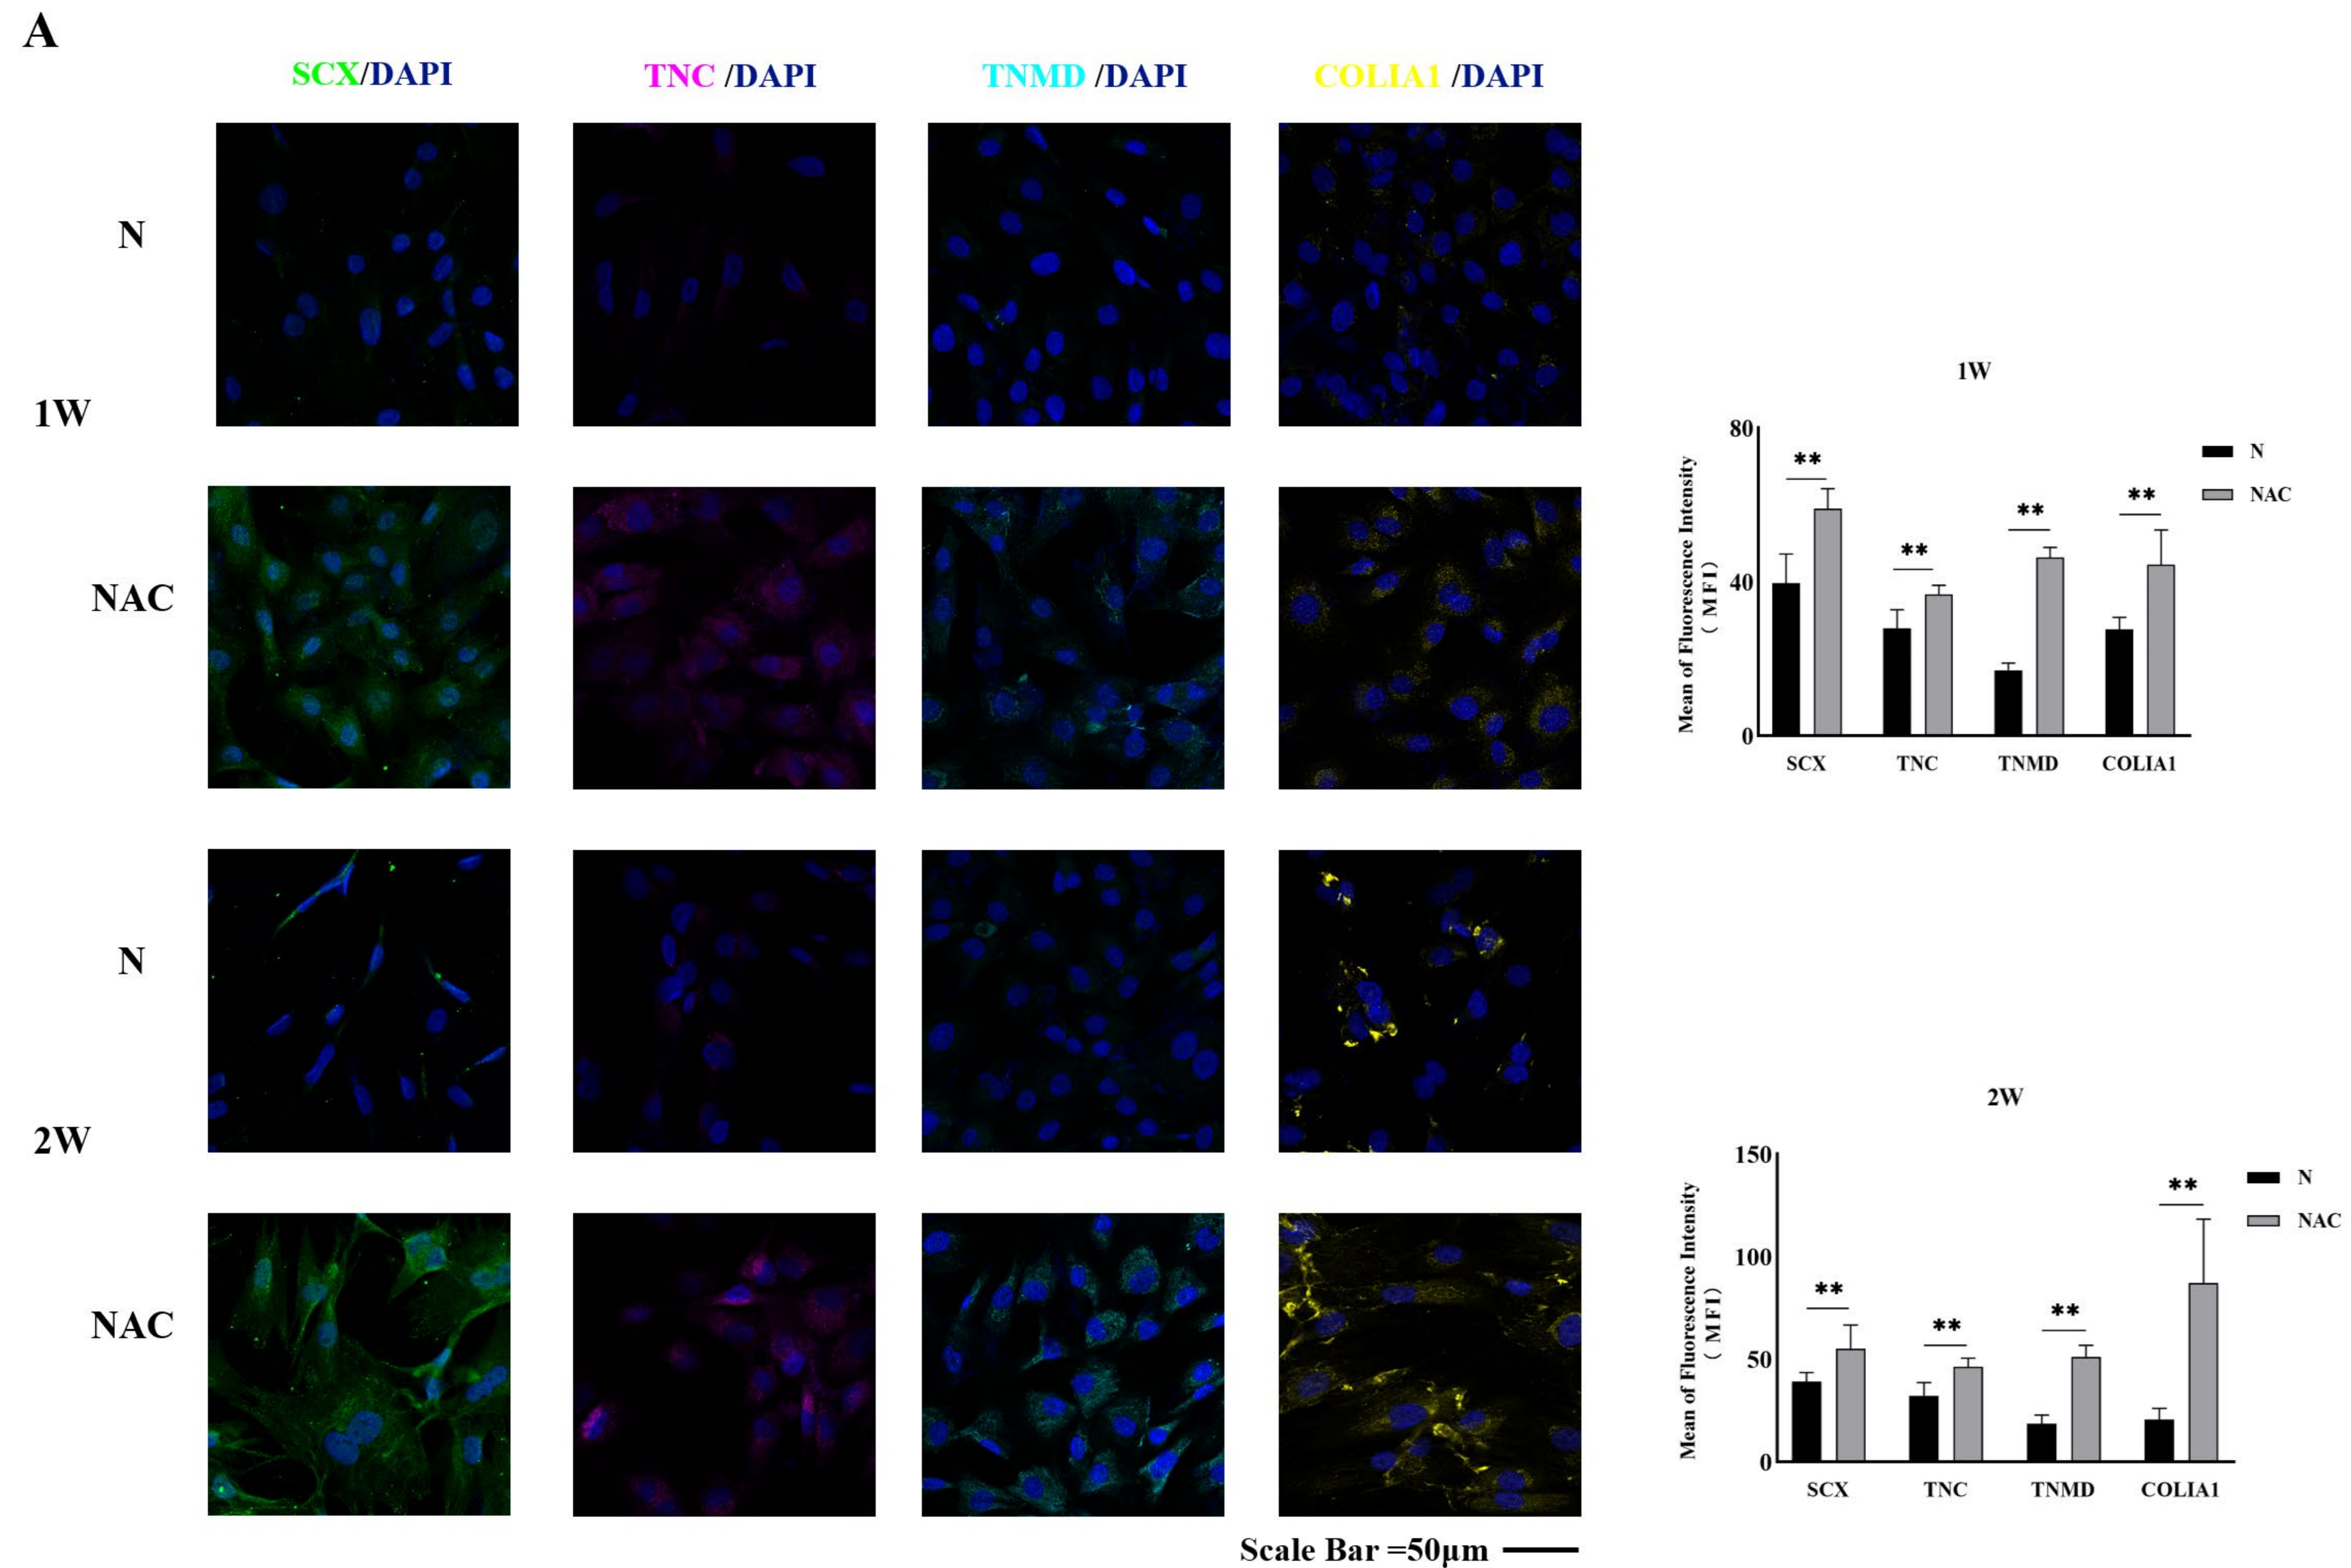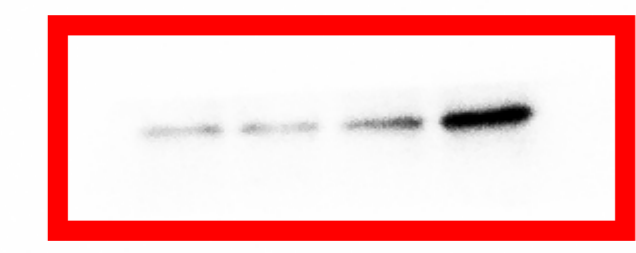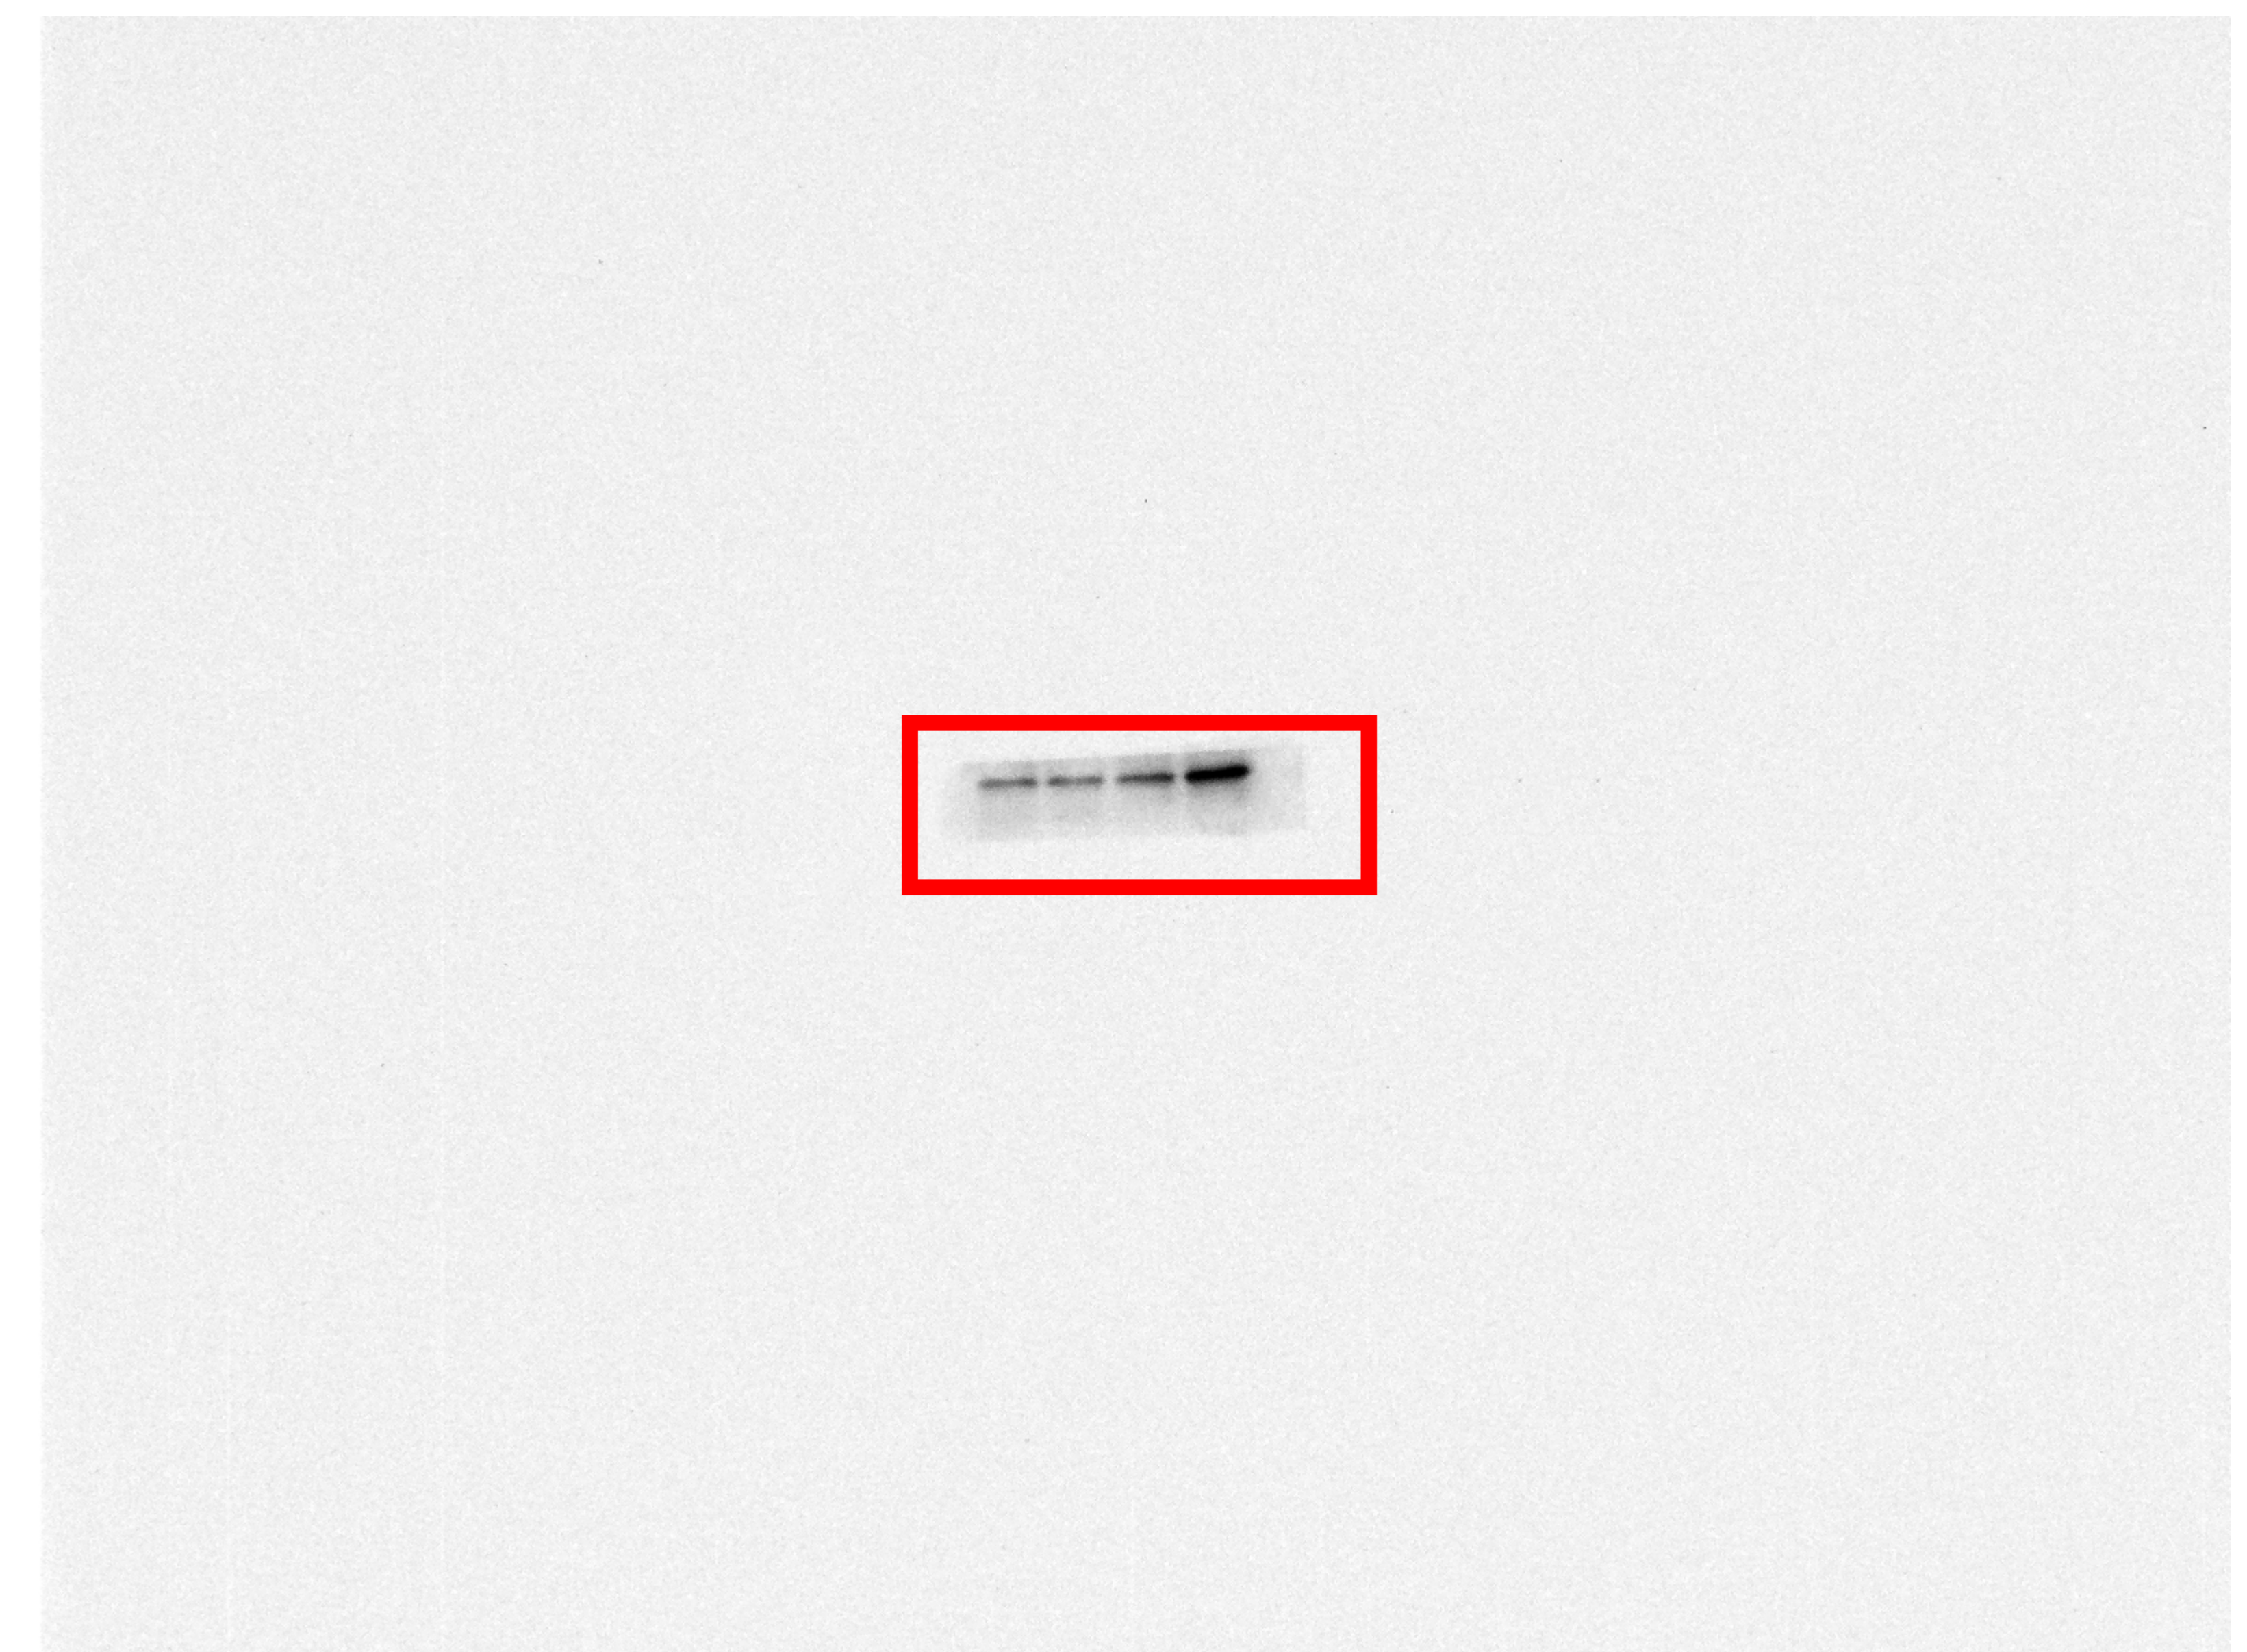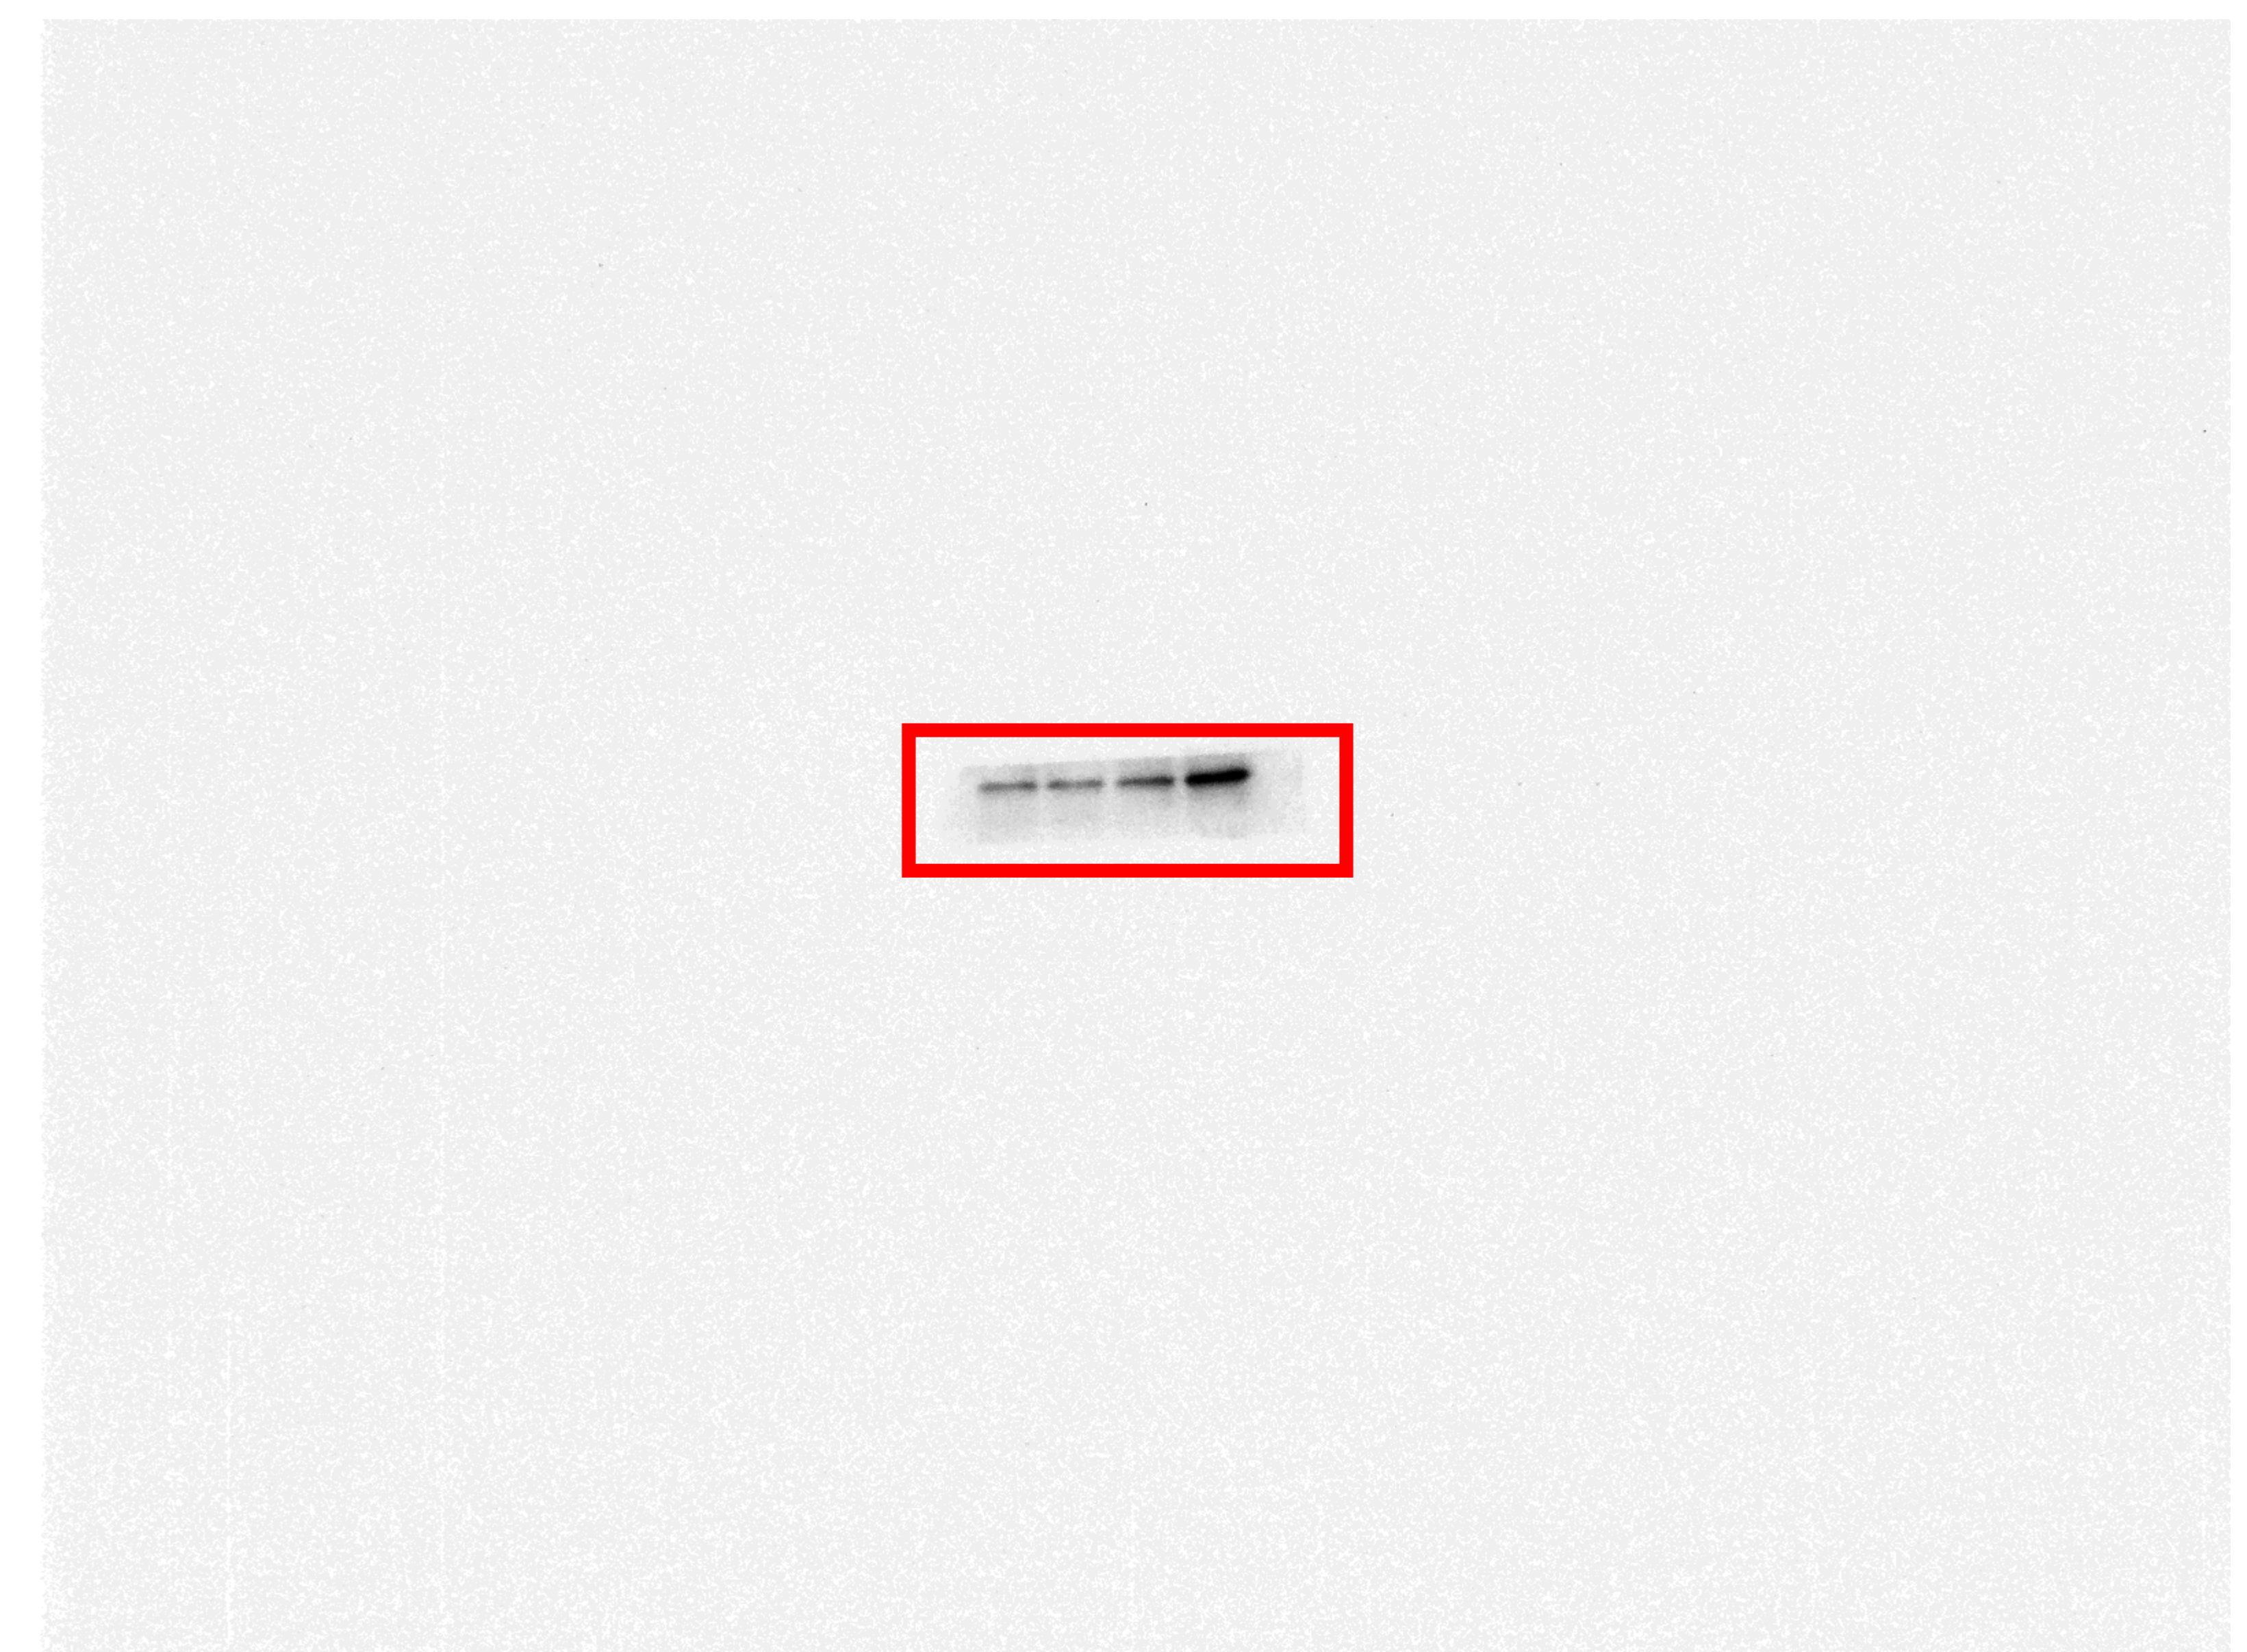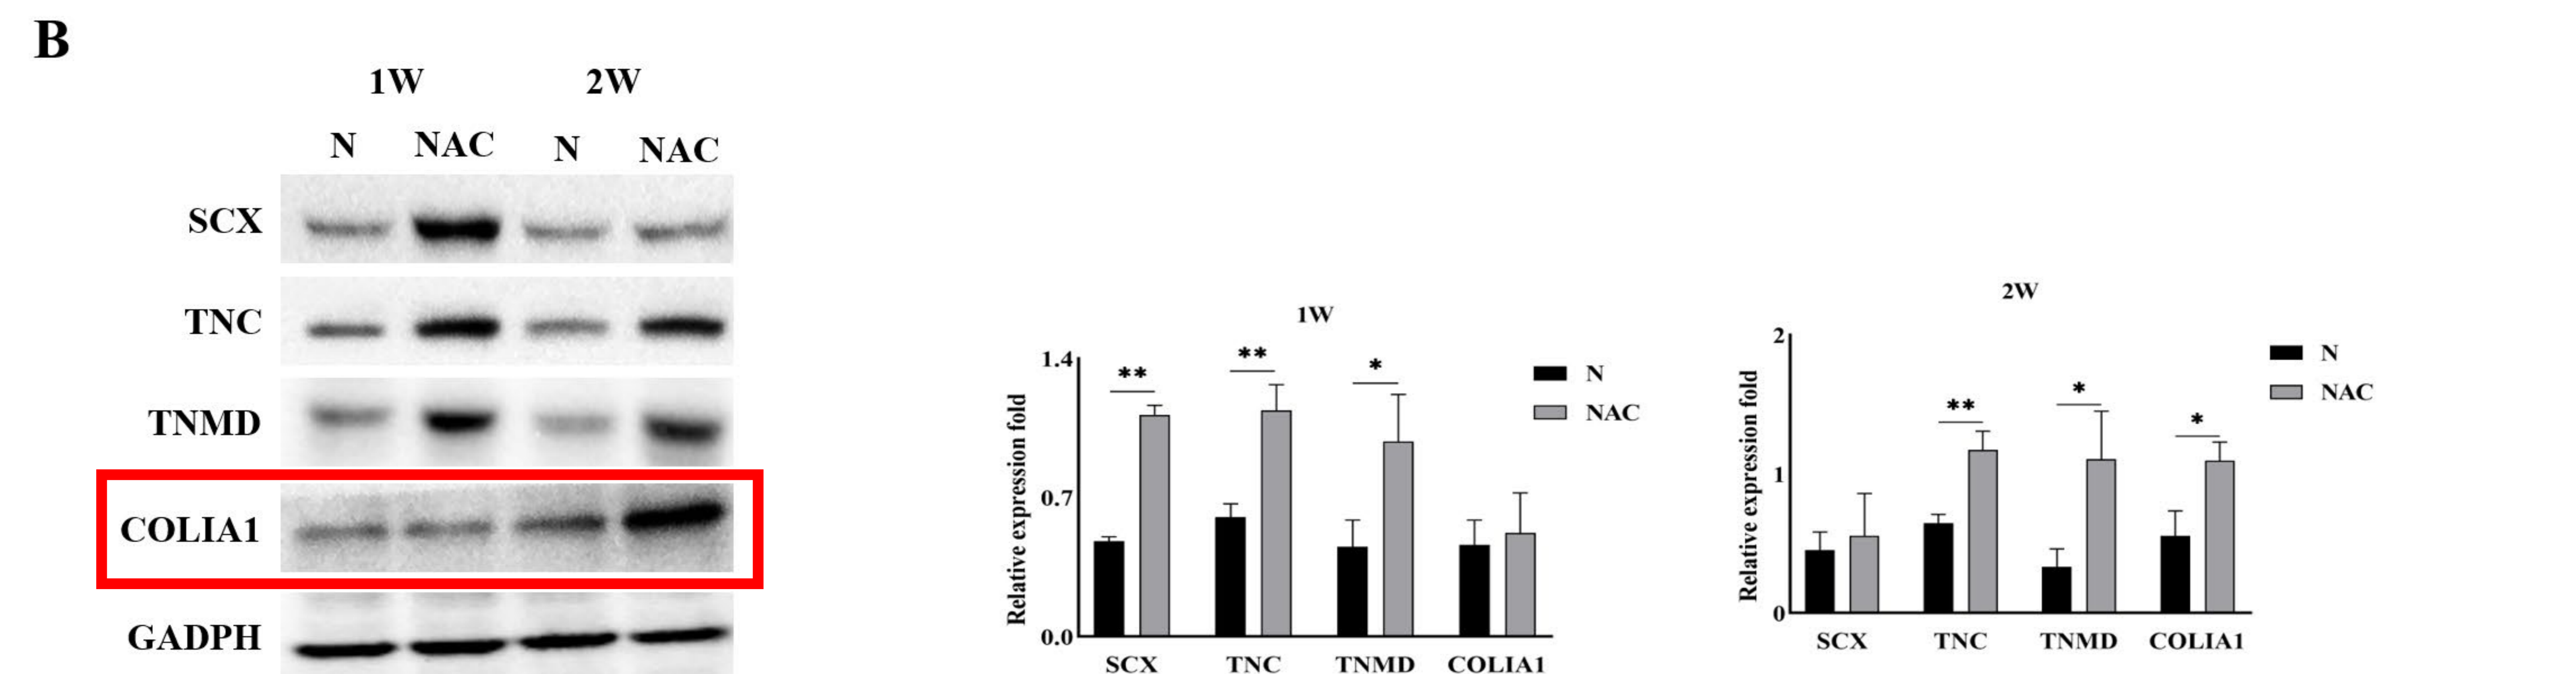

# Fig2B GADPH

Three times repeated exposure image

Fig 2



**B**

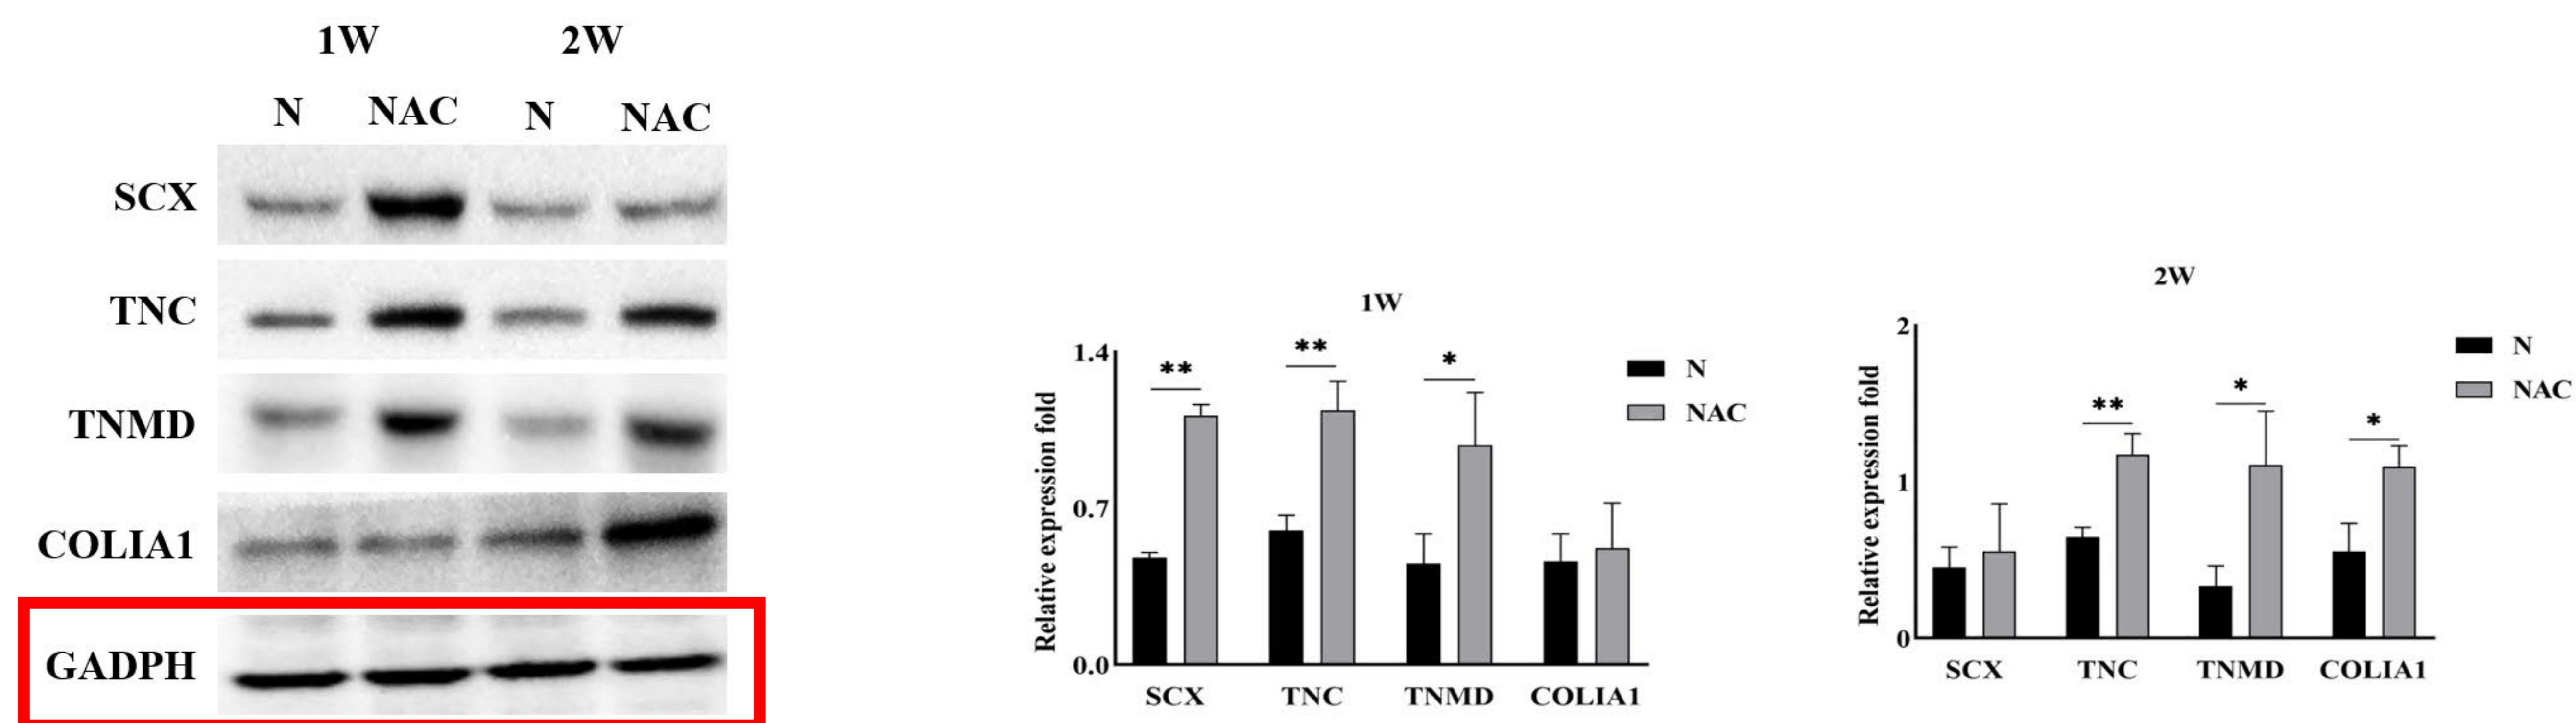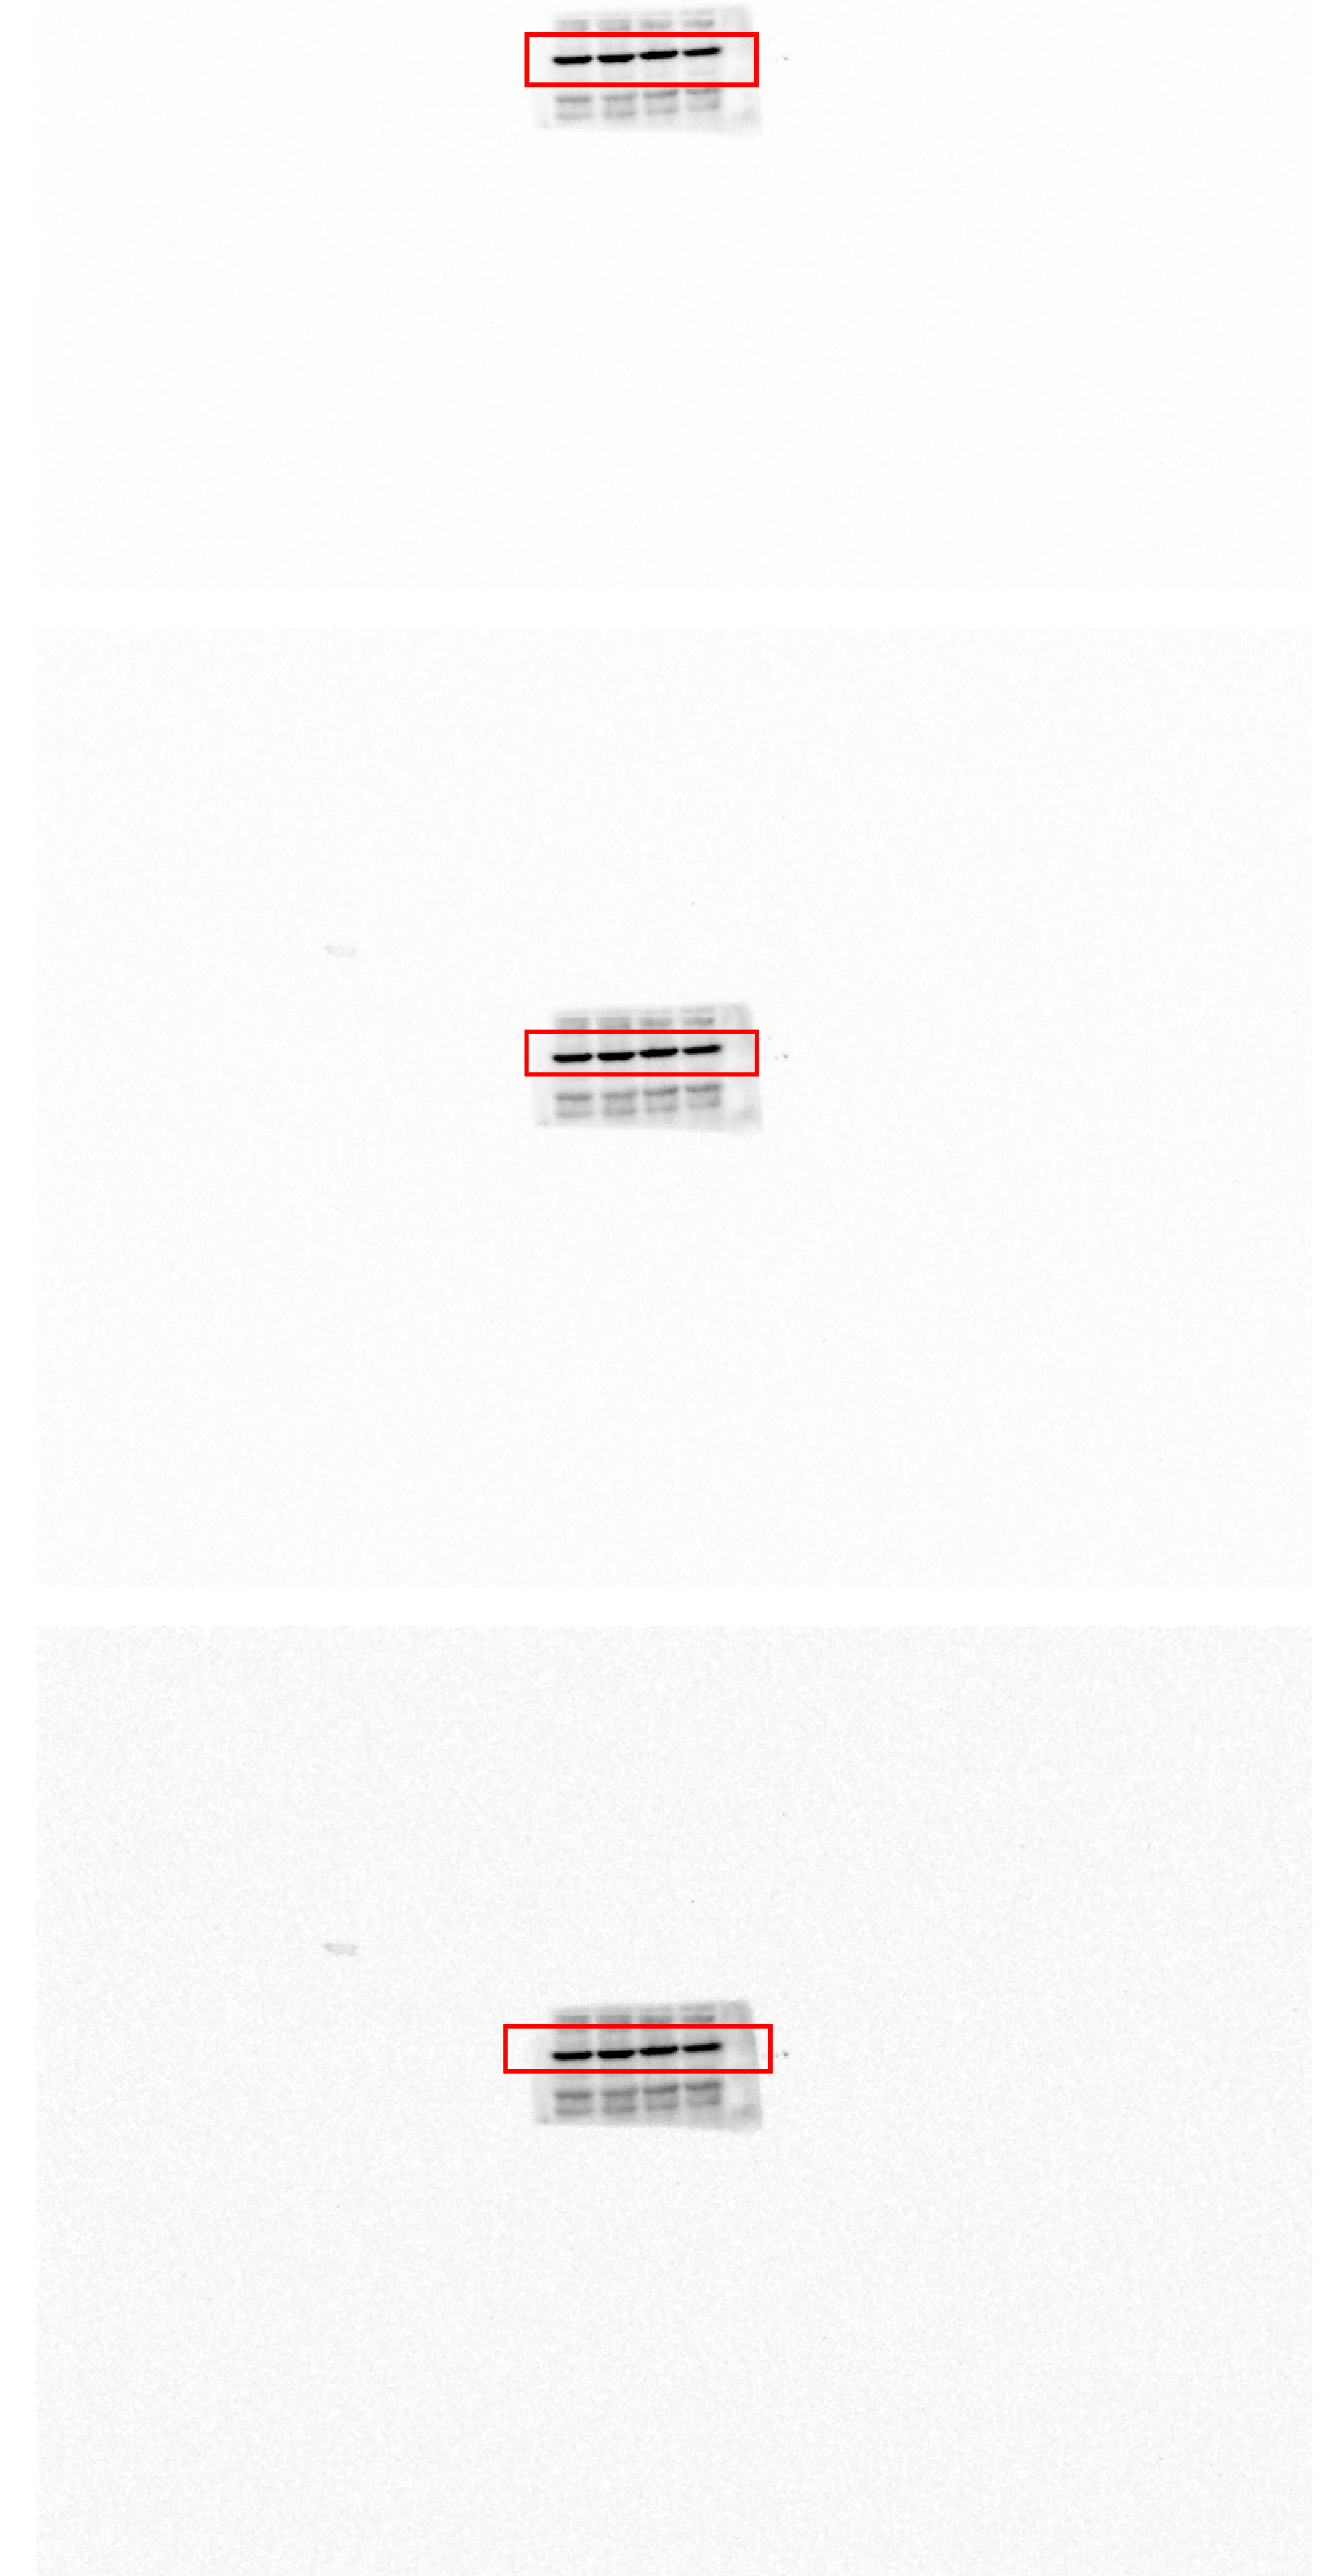

Supplement: 12860_2022_463_MOESM3_ESM.pdf [file 12860_2022_463_MOESM3_ESM.pdf]
