# Supplementary material for: N-Acetyl-L-cysteine facilitates tendon repair and promotes the tenogenic differentiation of tendon stem/progenitor cells by enhancing the integrin α5/β1/PI3K/AKT signaling
Source: PubMed Central journal article supplement (PMC9814204; doi:10.1186/s12860-022-00463-0), 2023-01-05

# Fig4B PI3K

Three times repeated exposure image

Fig 4

A

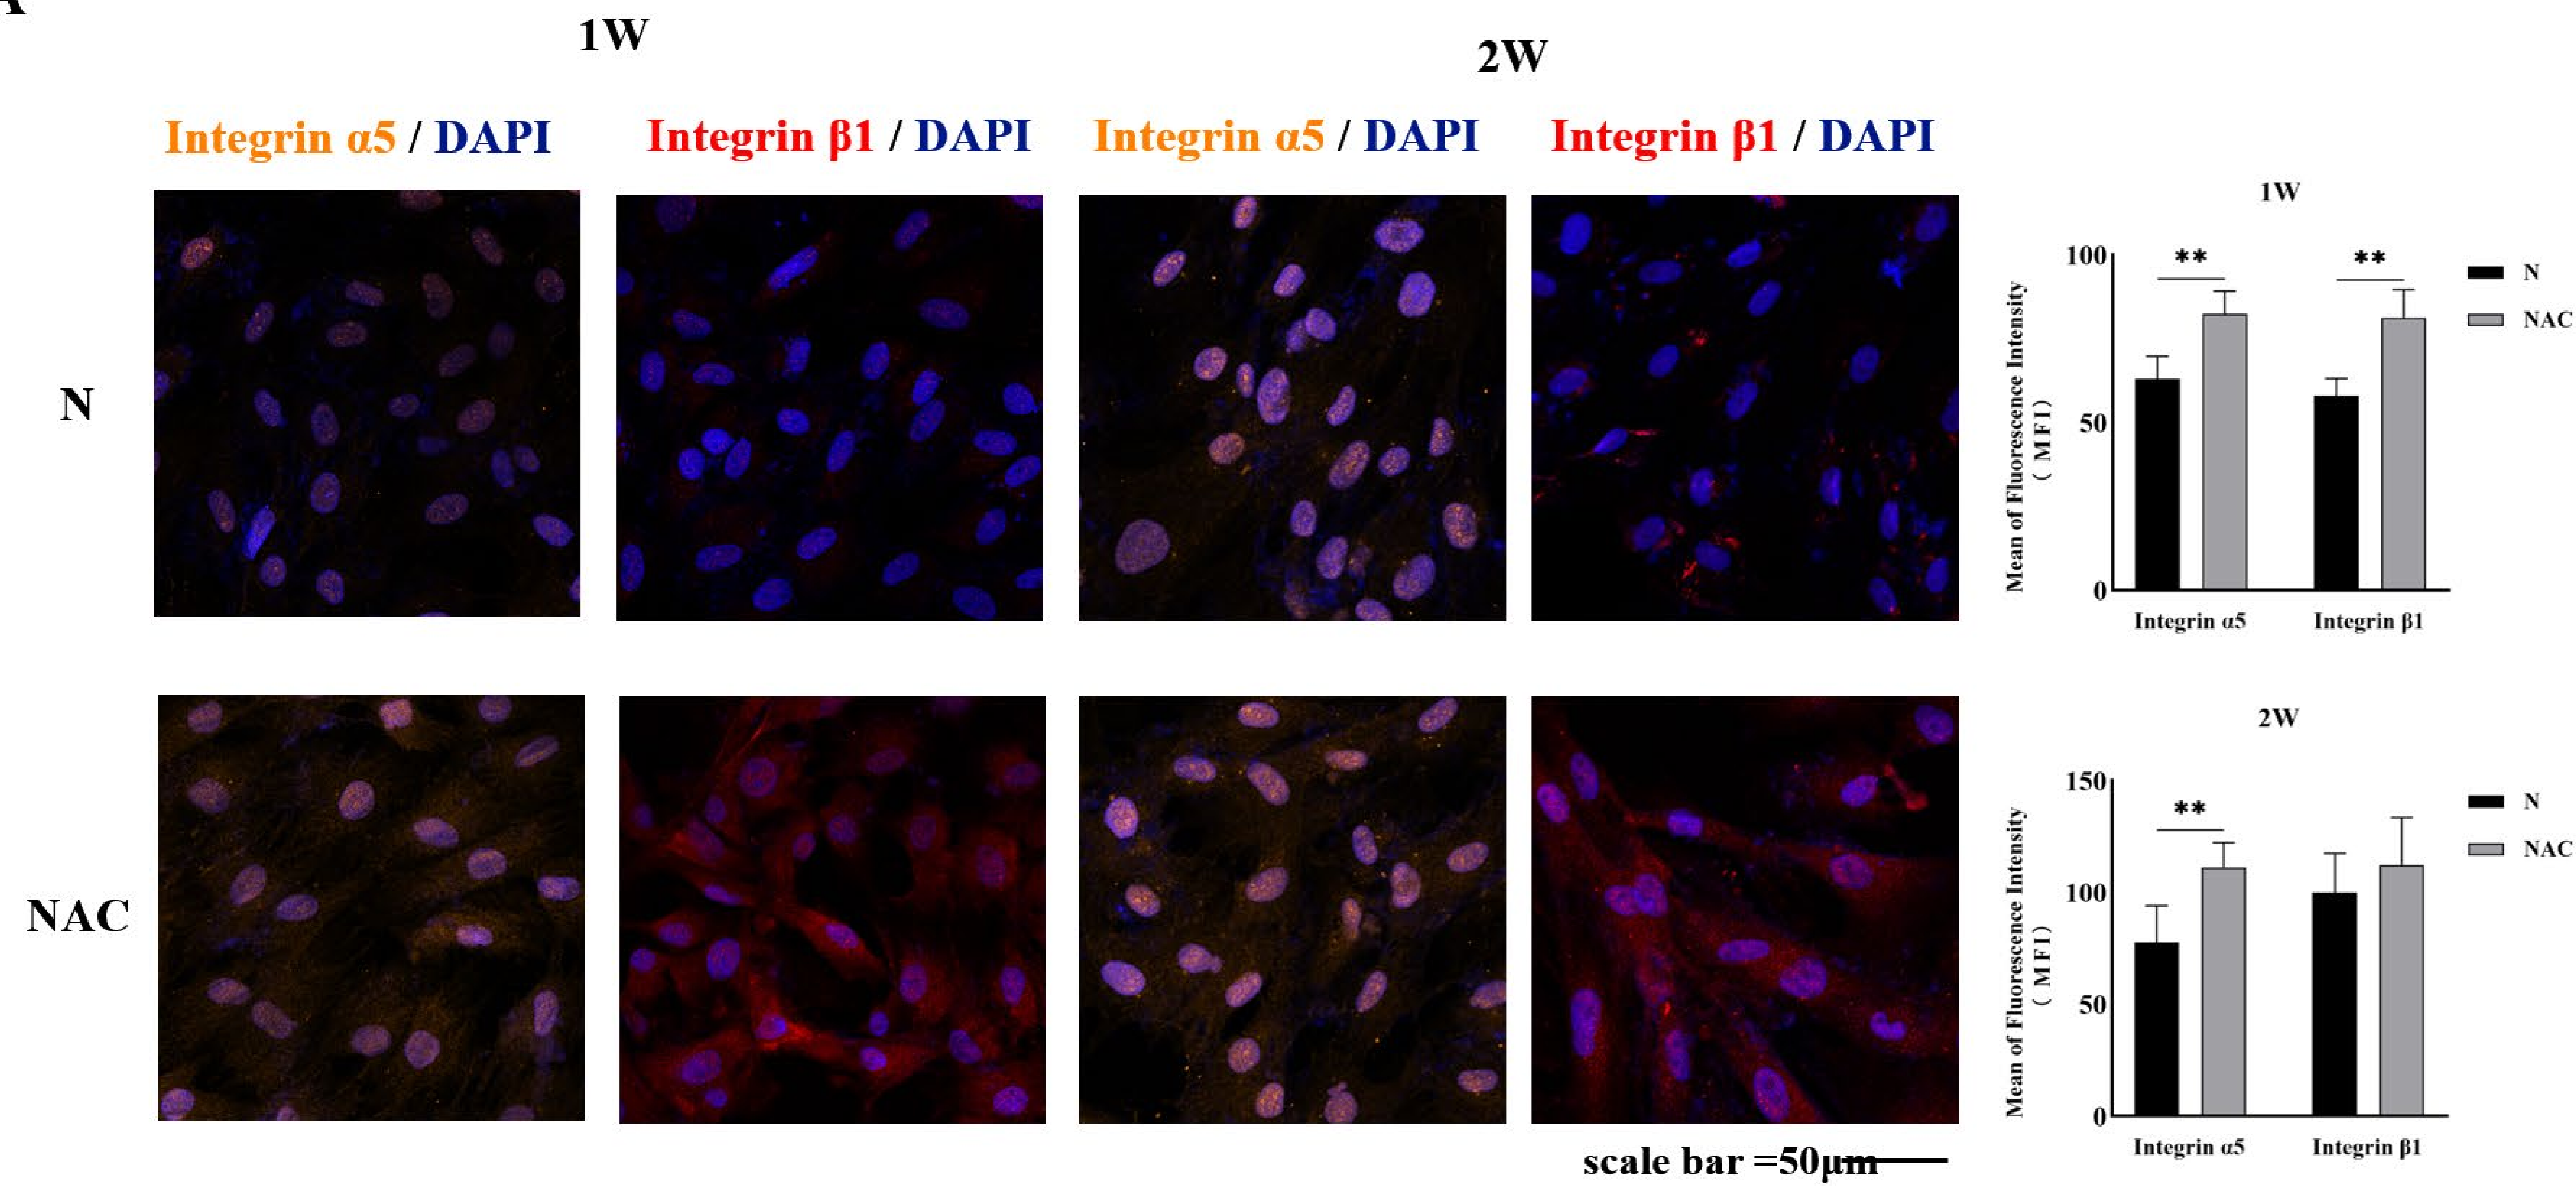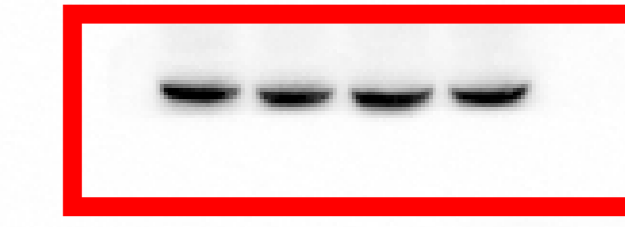

B

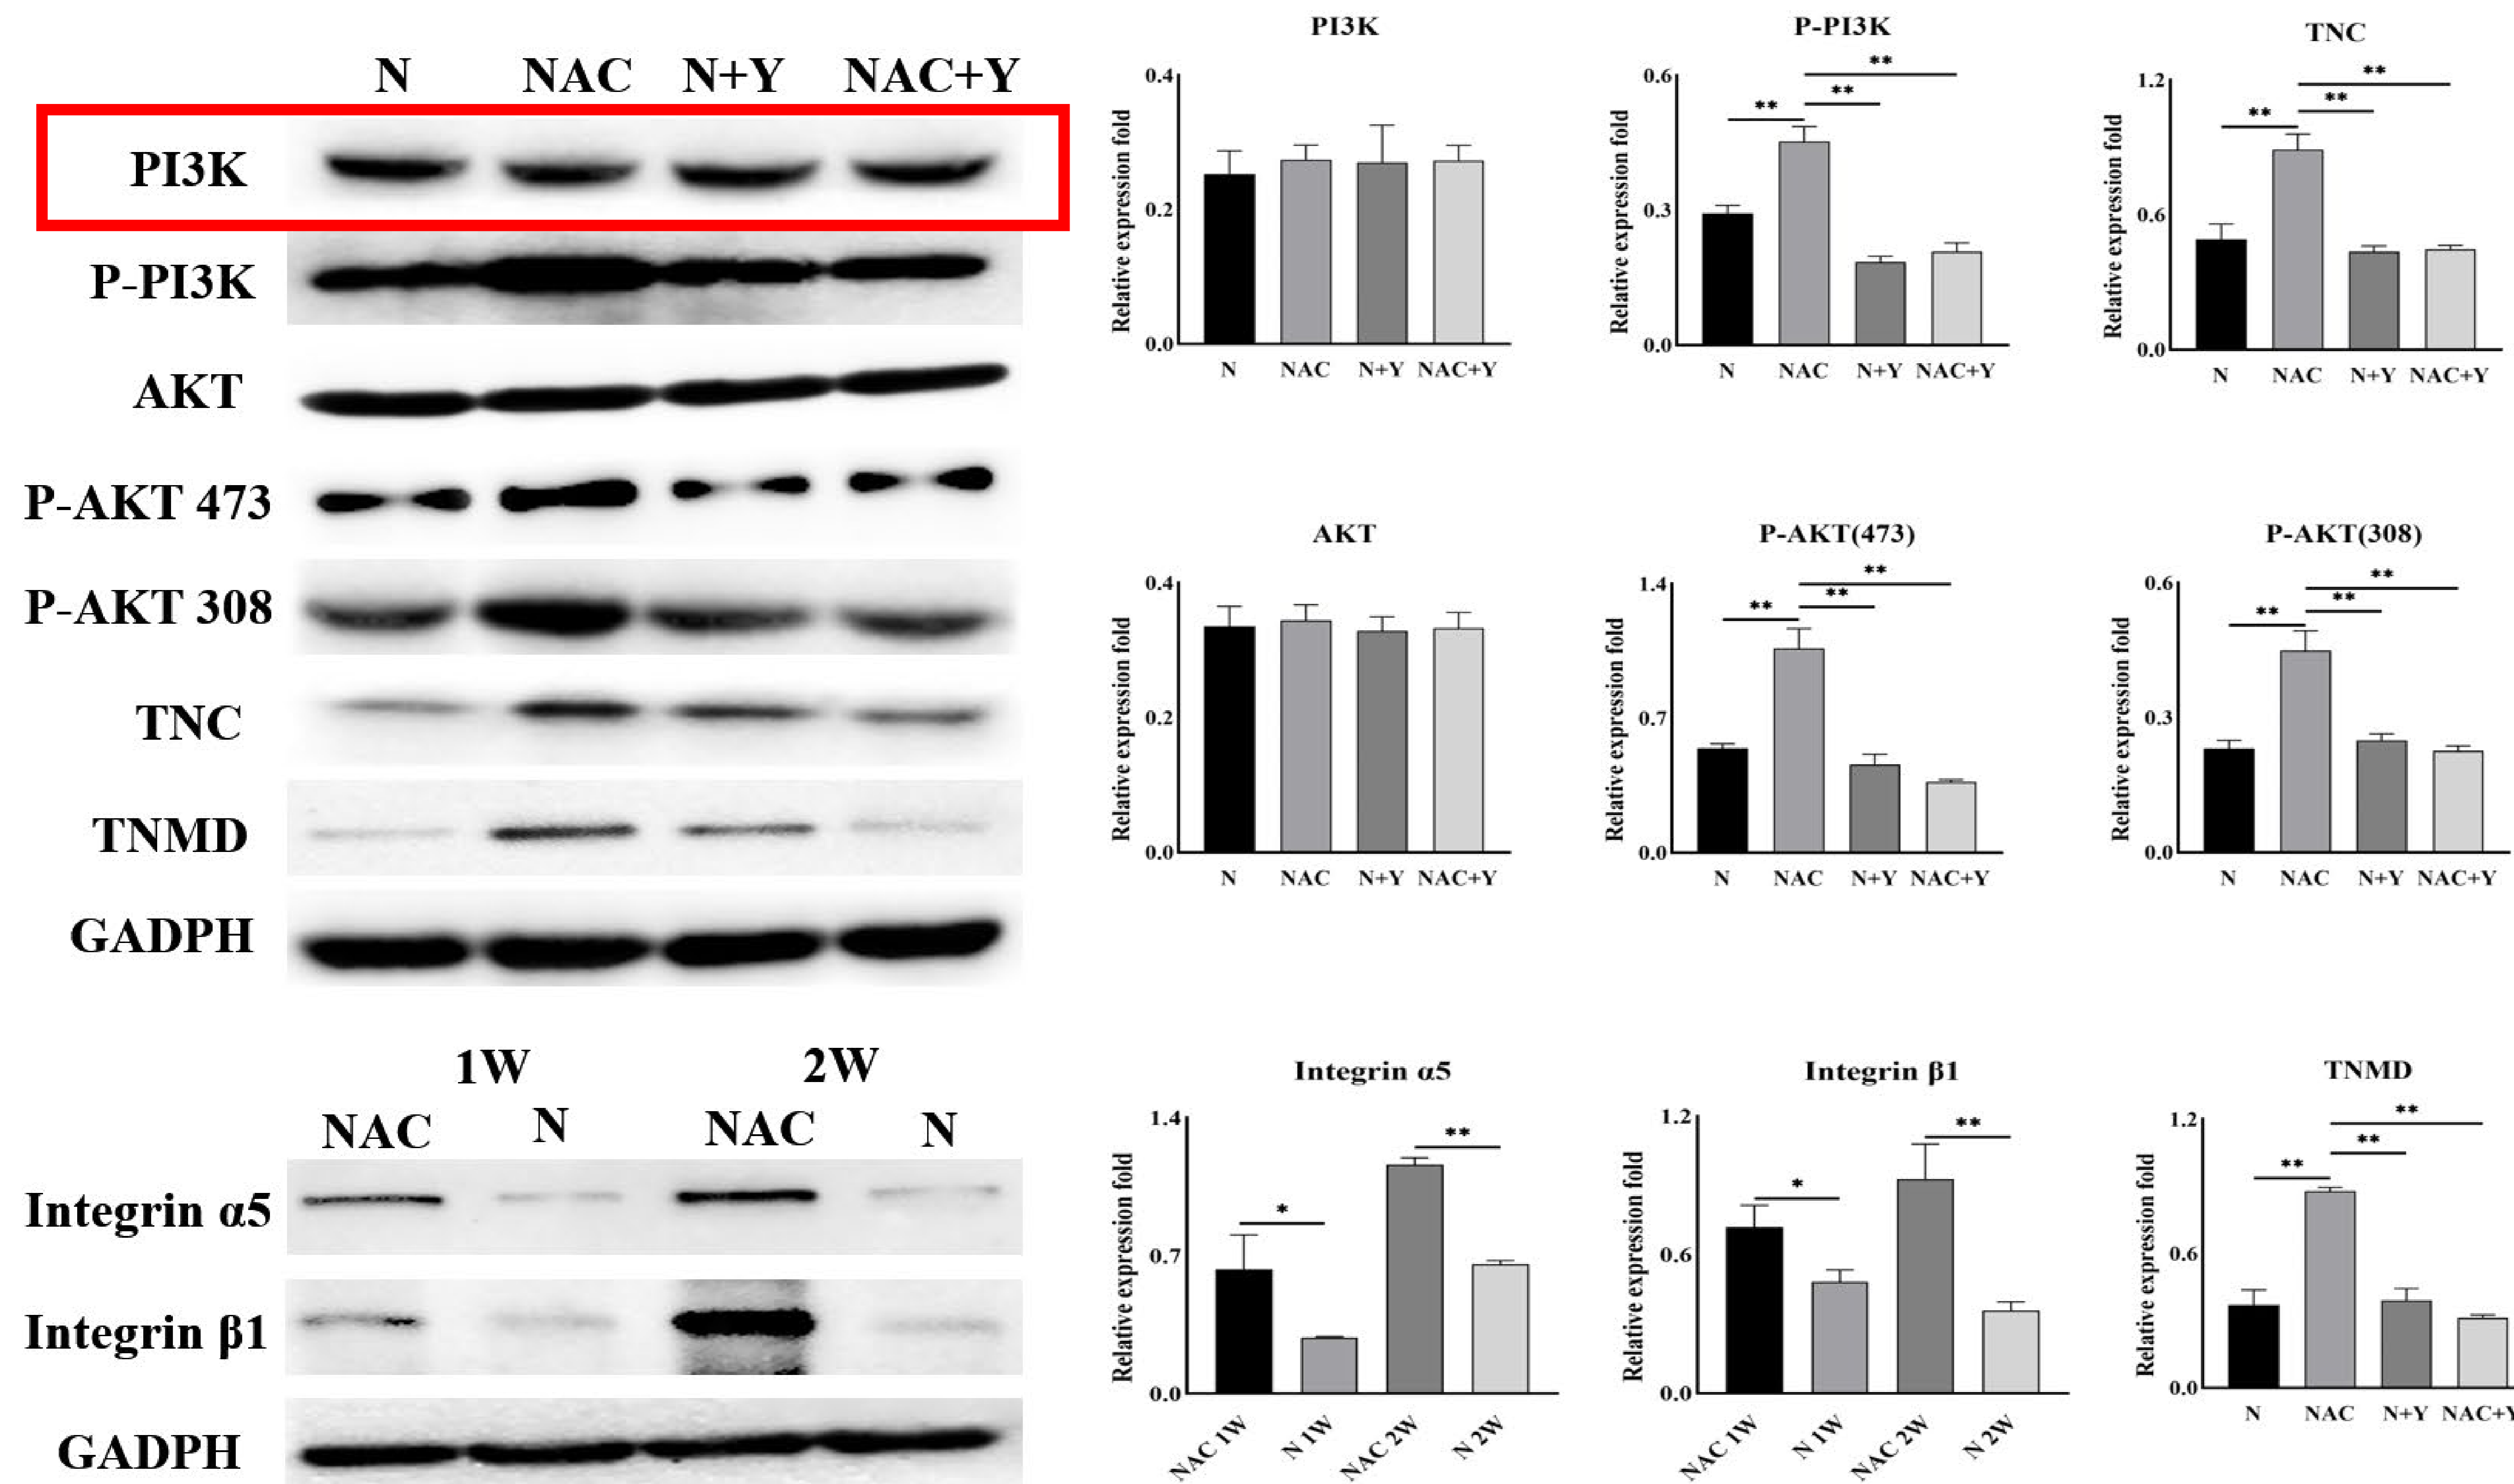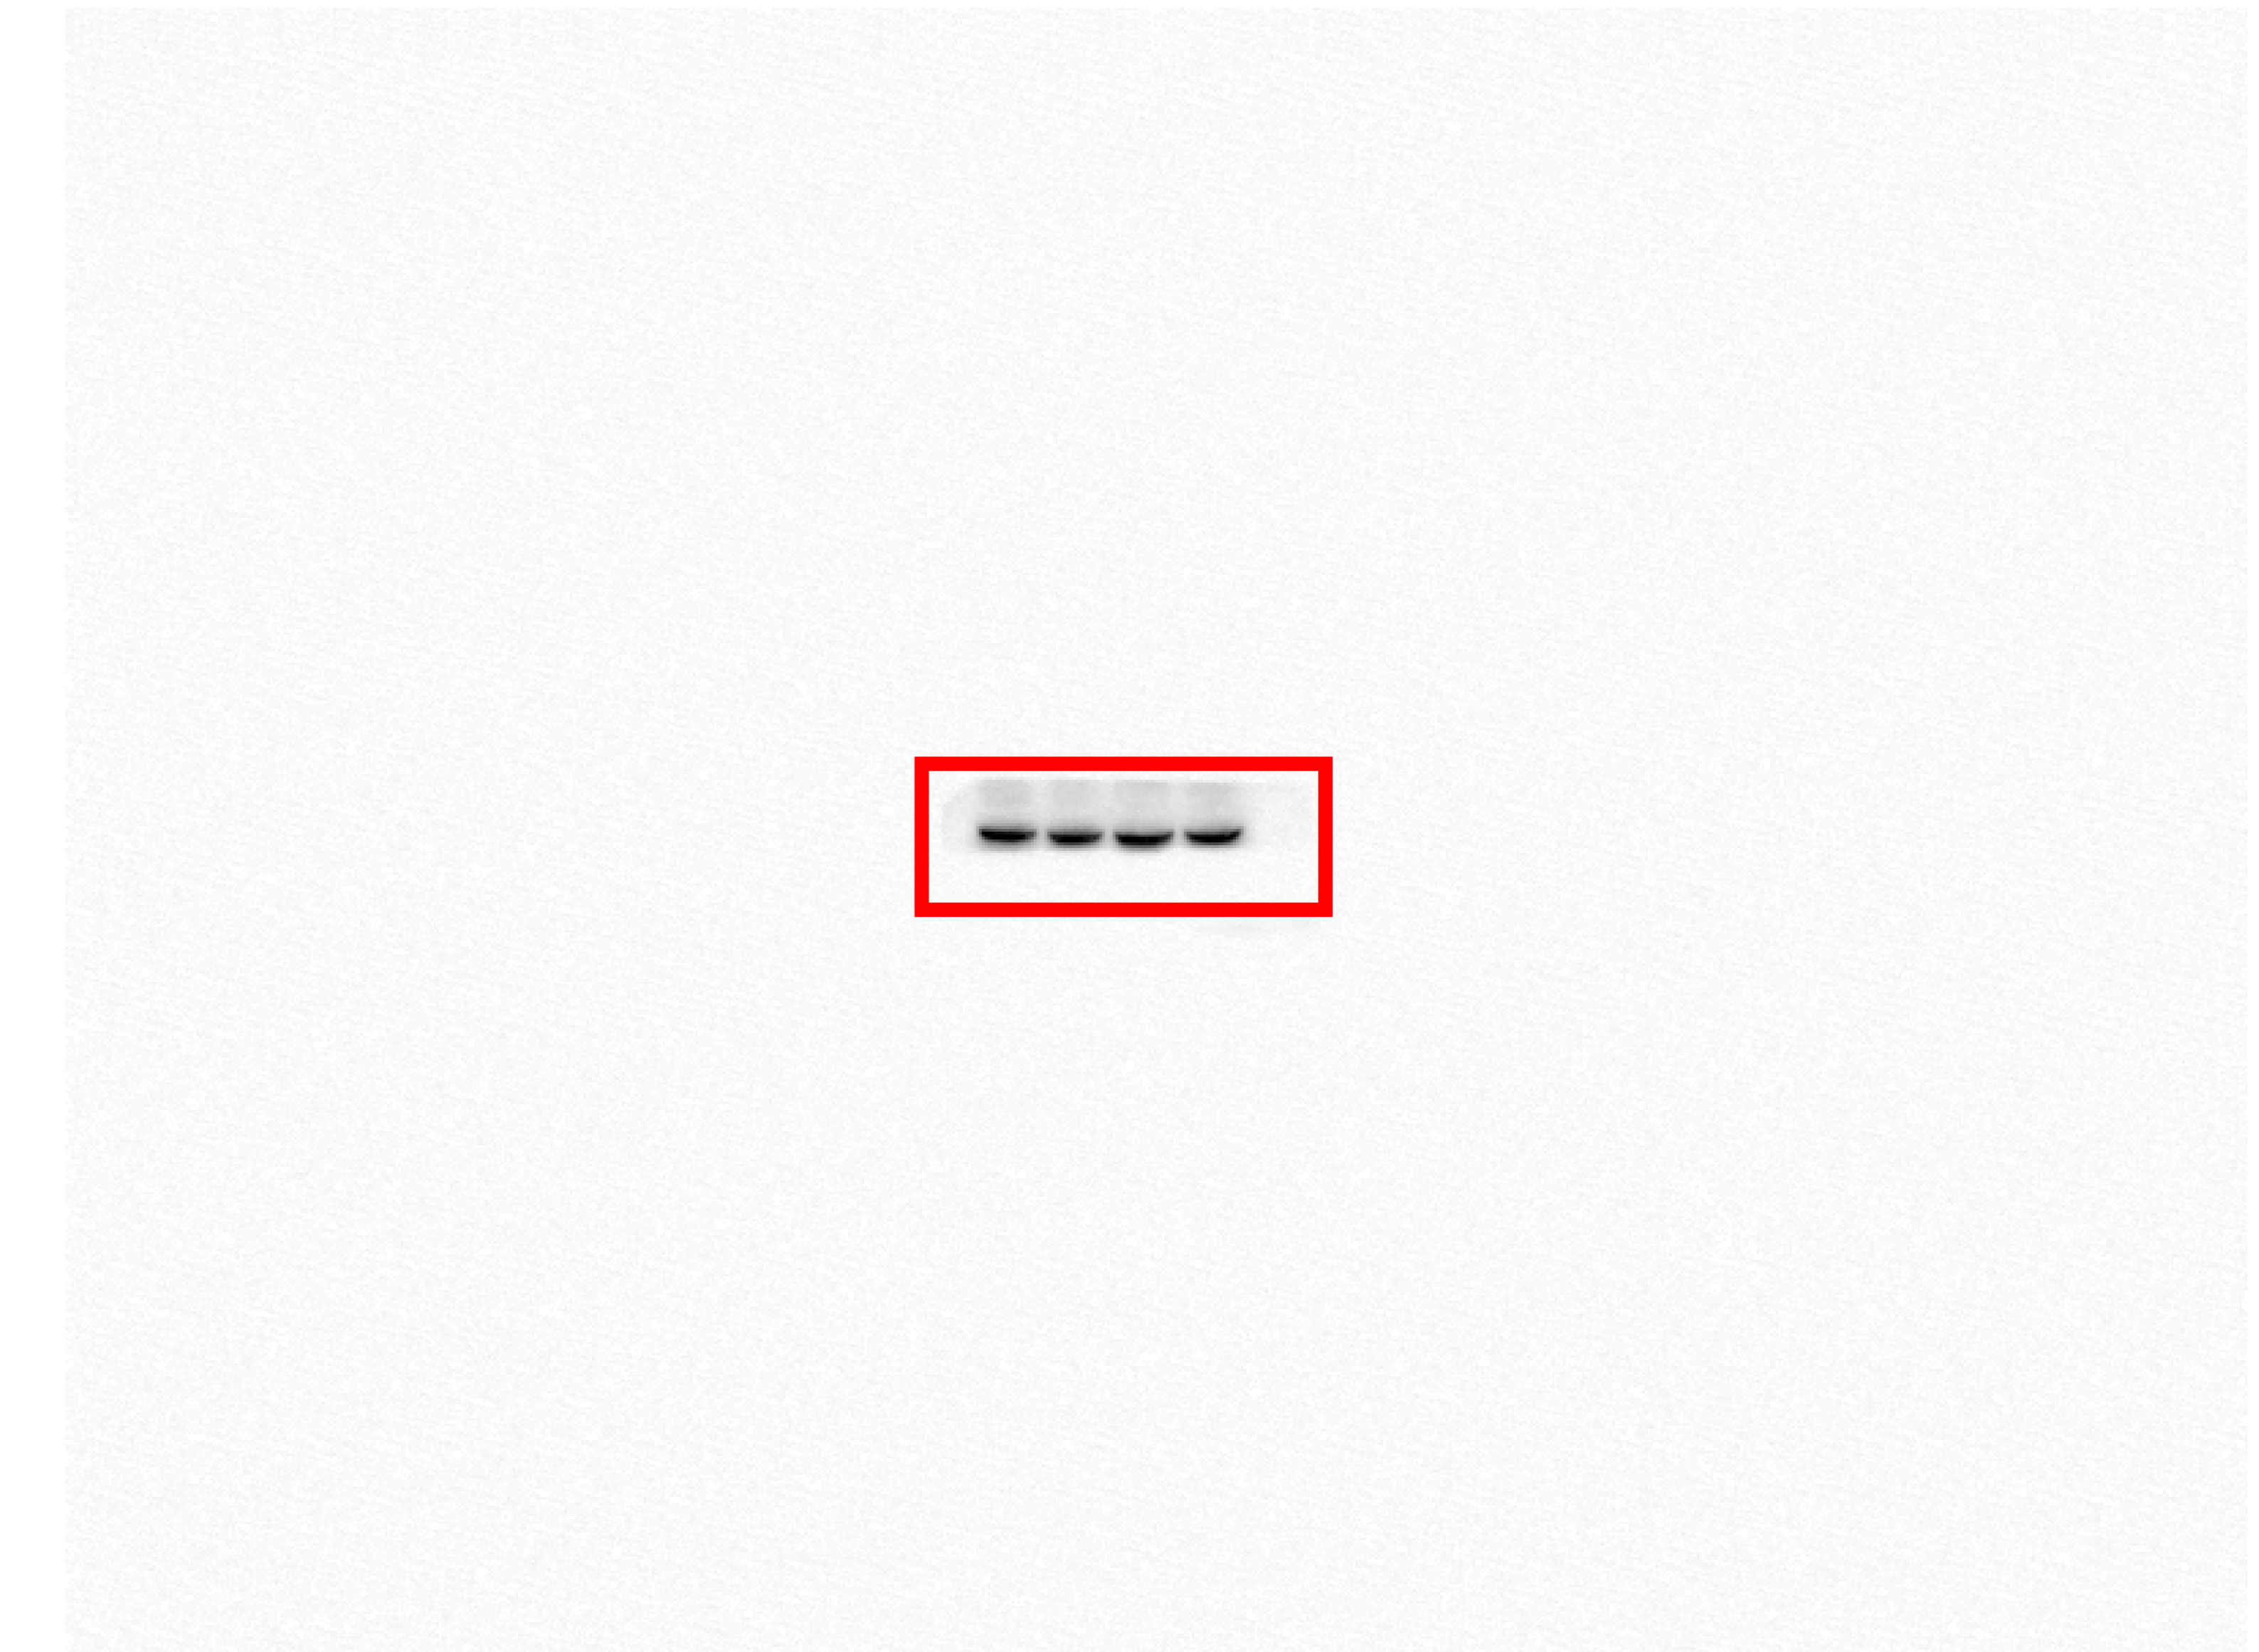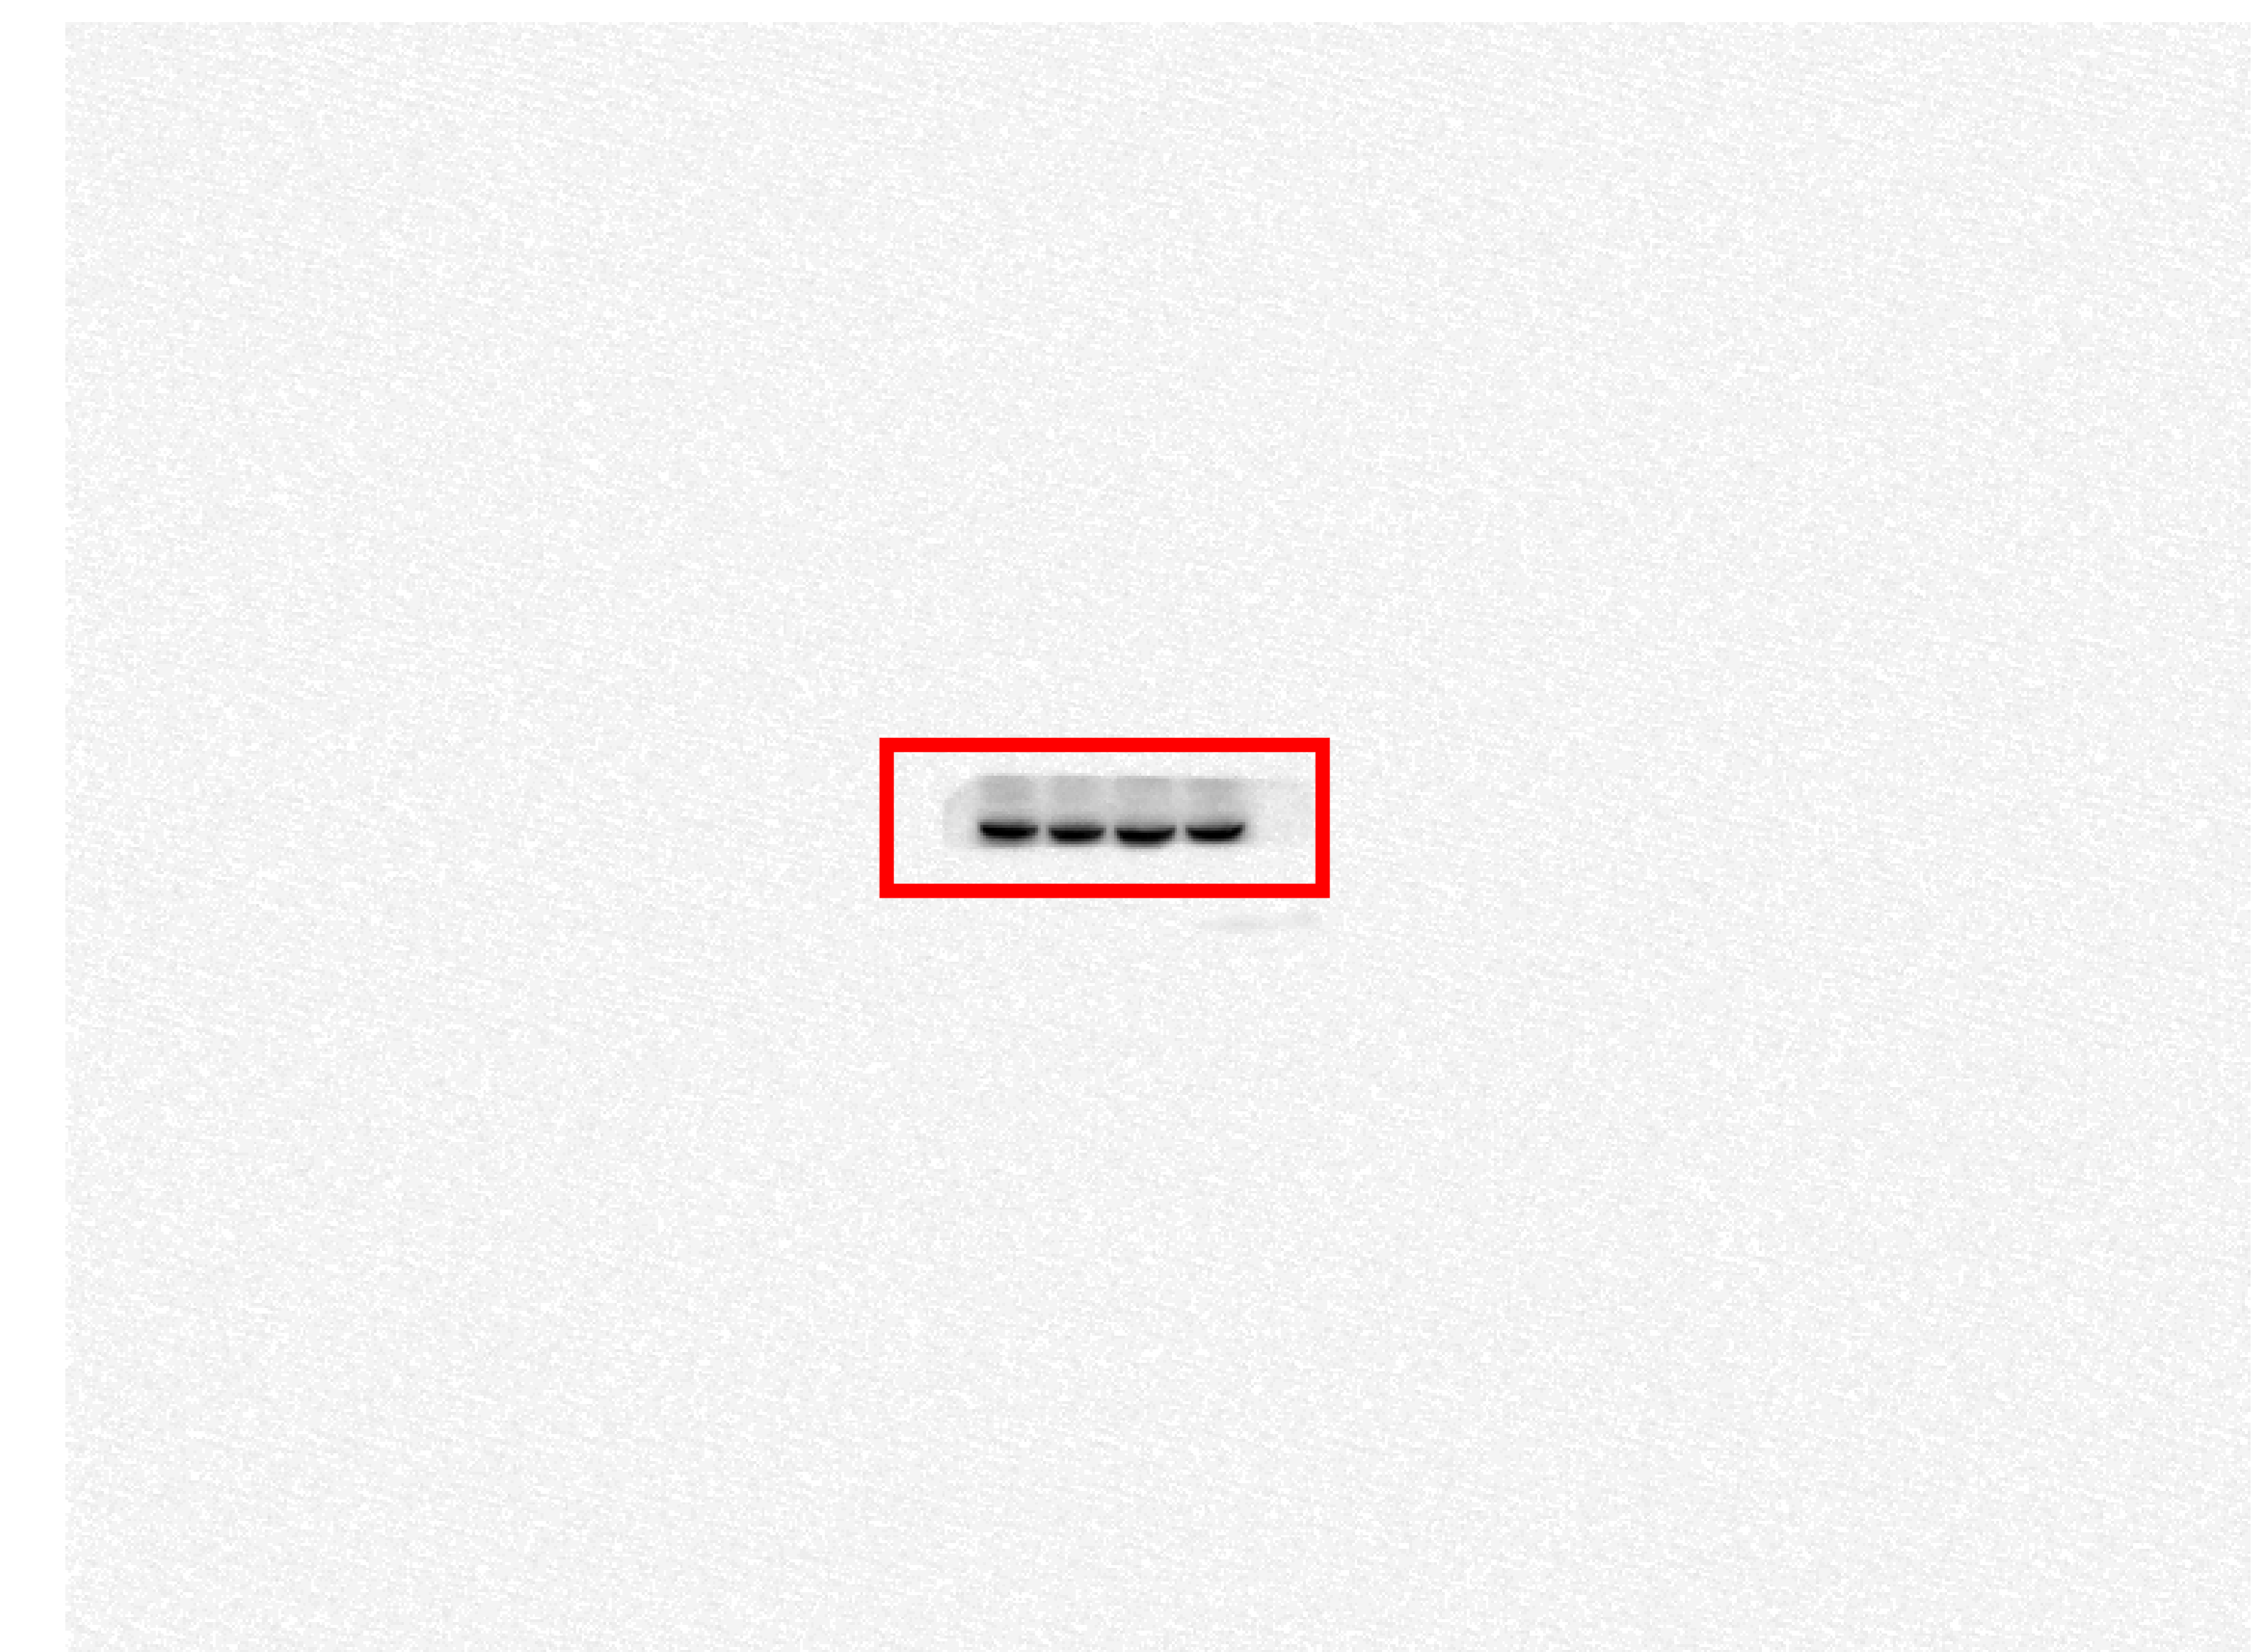

# Fig4B P-PI3K

Three times repeated exposure image

Fig 4

A

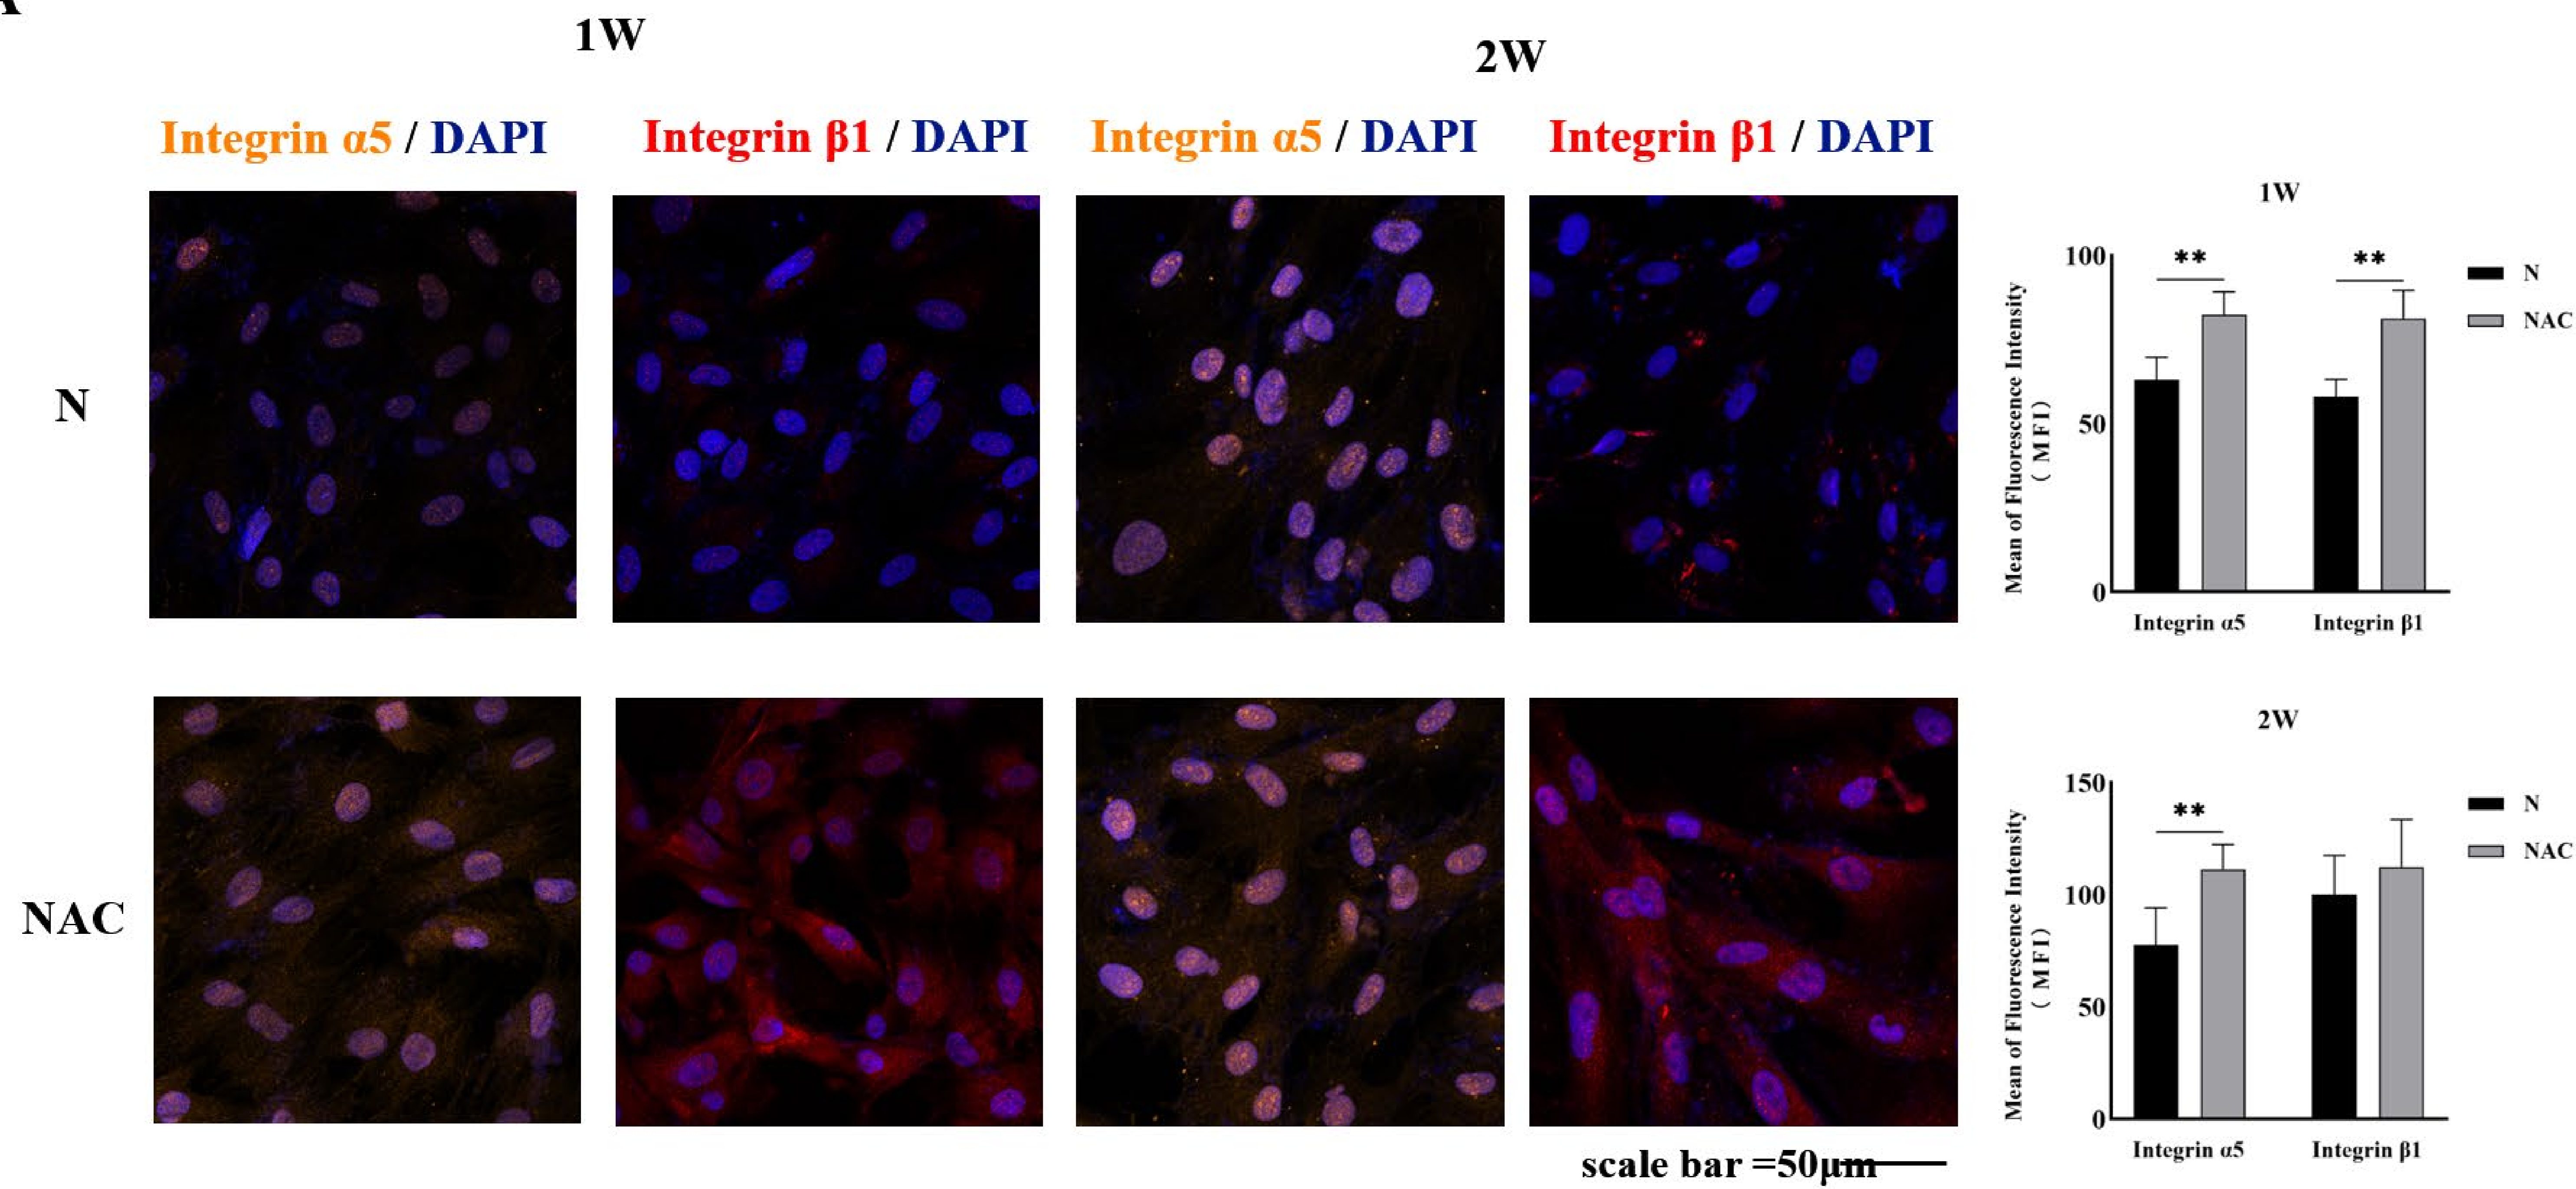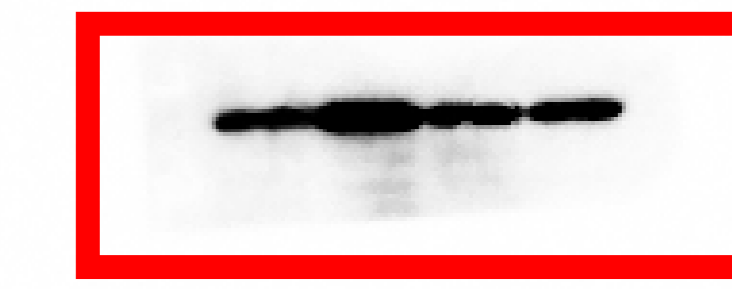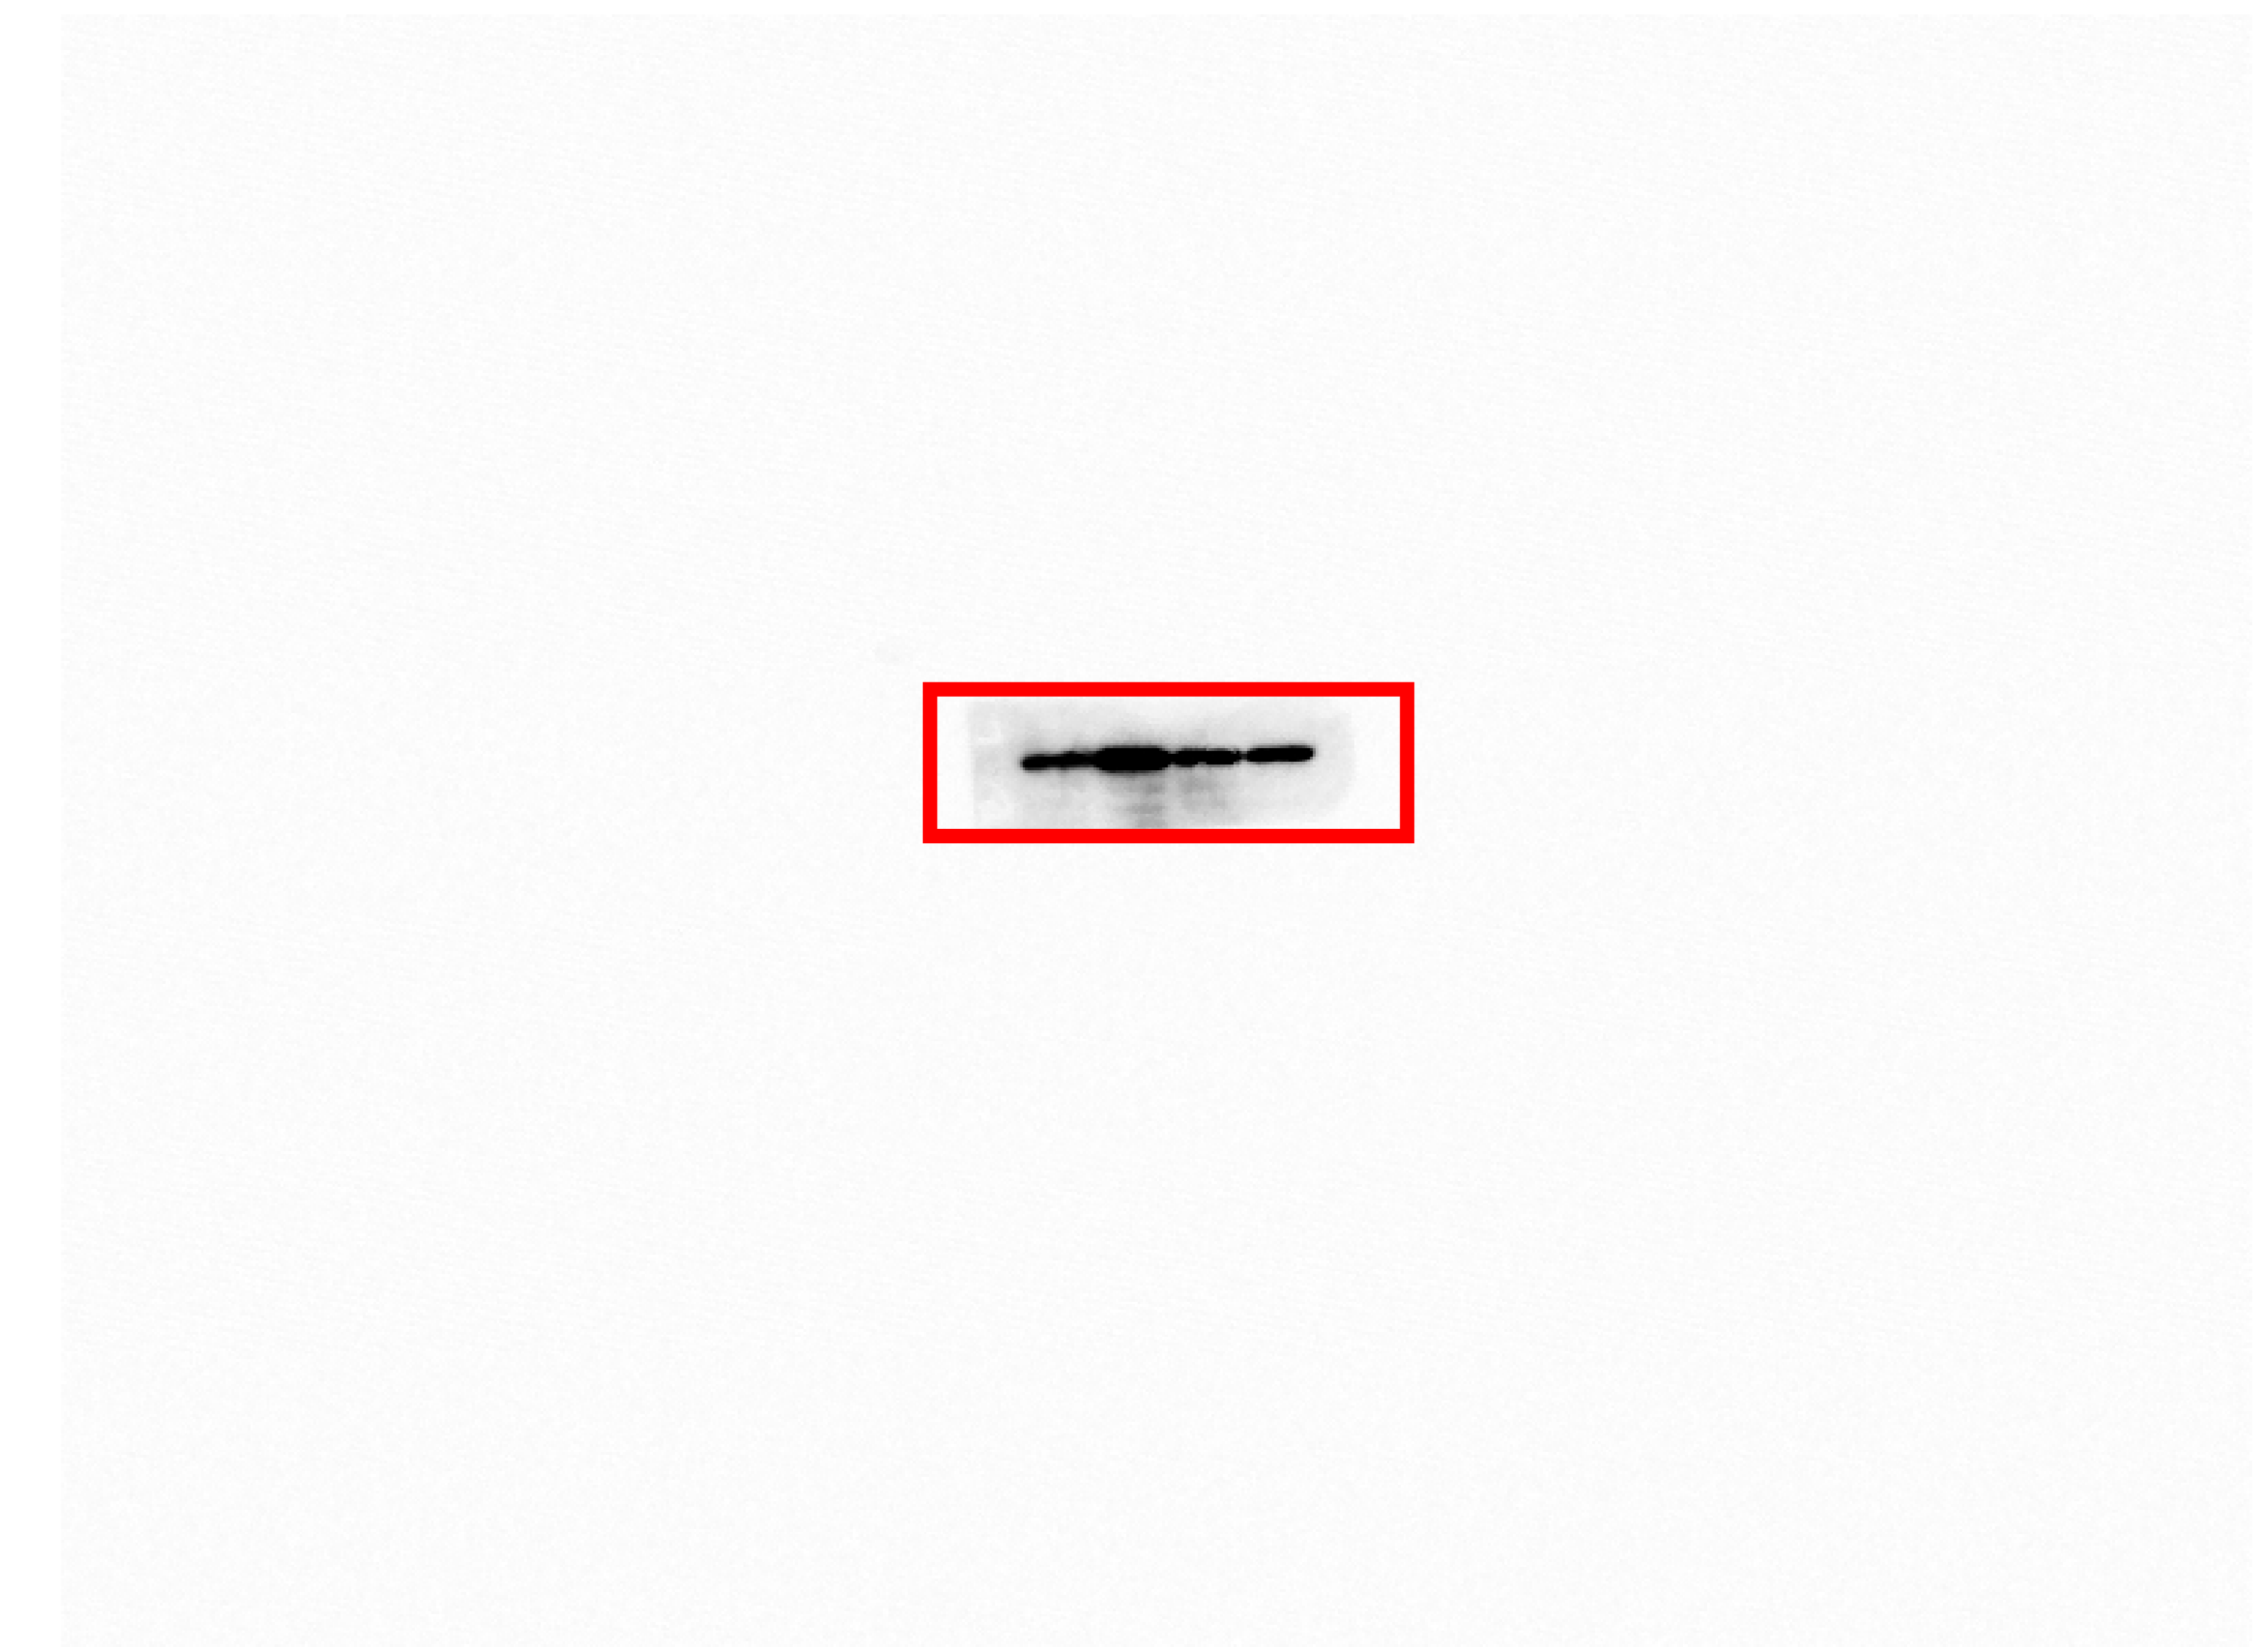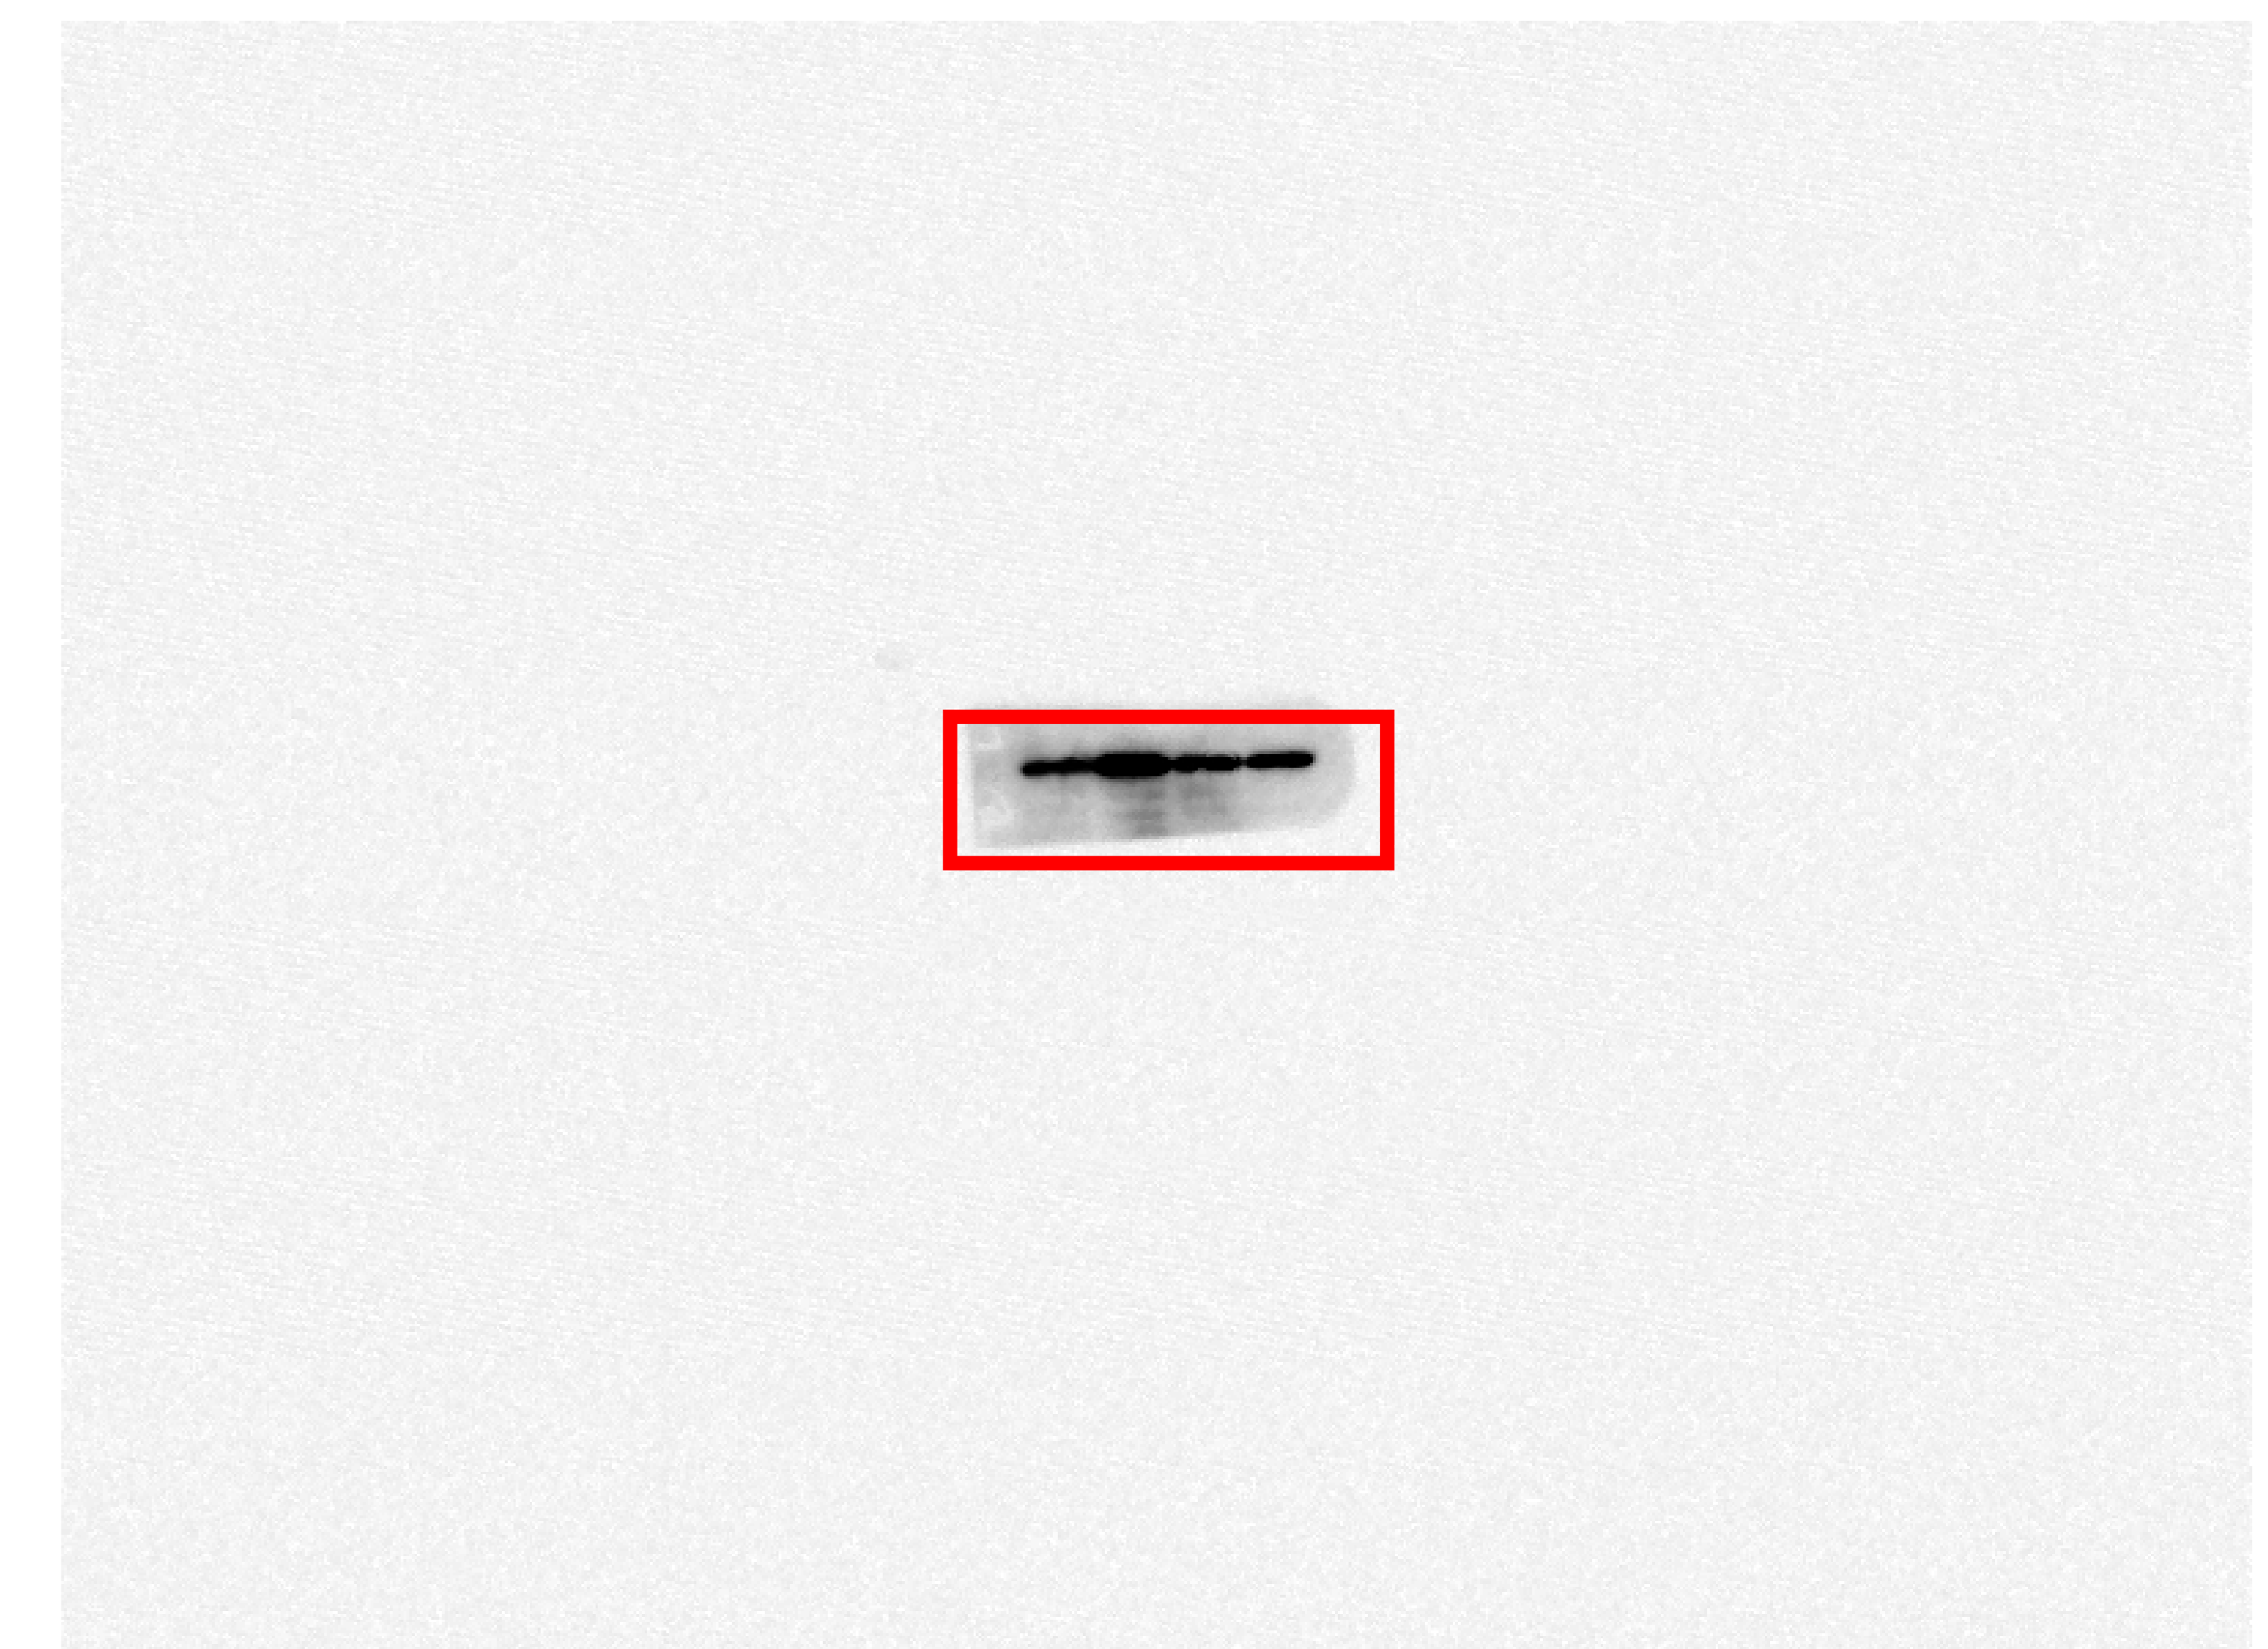

B

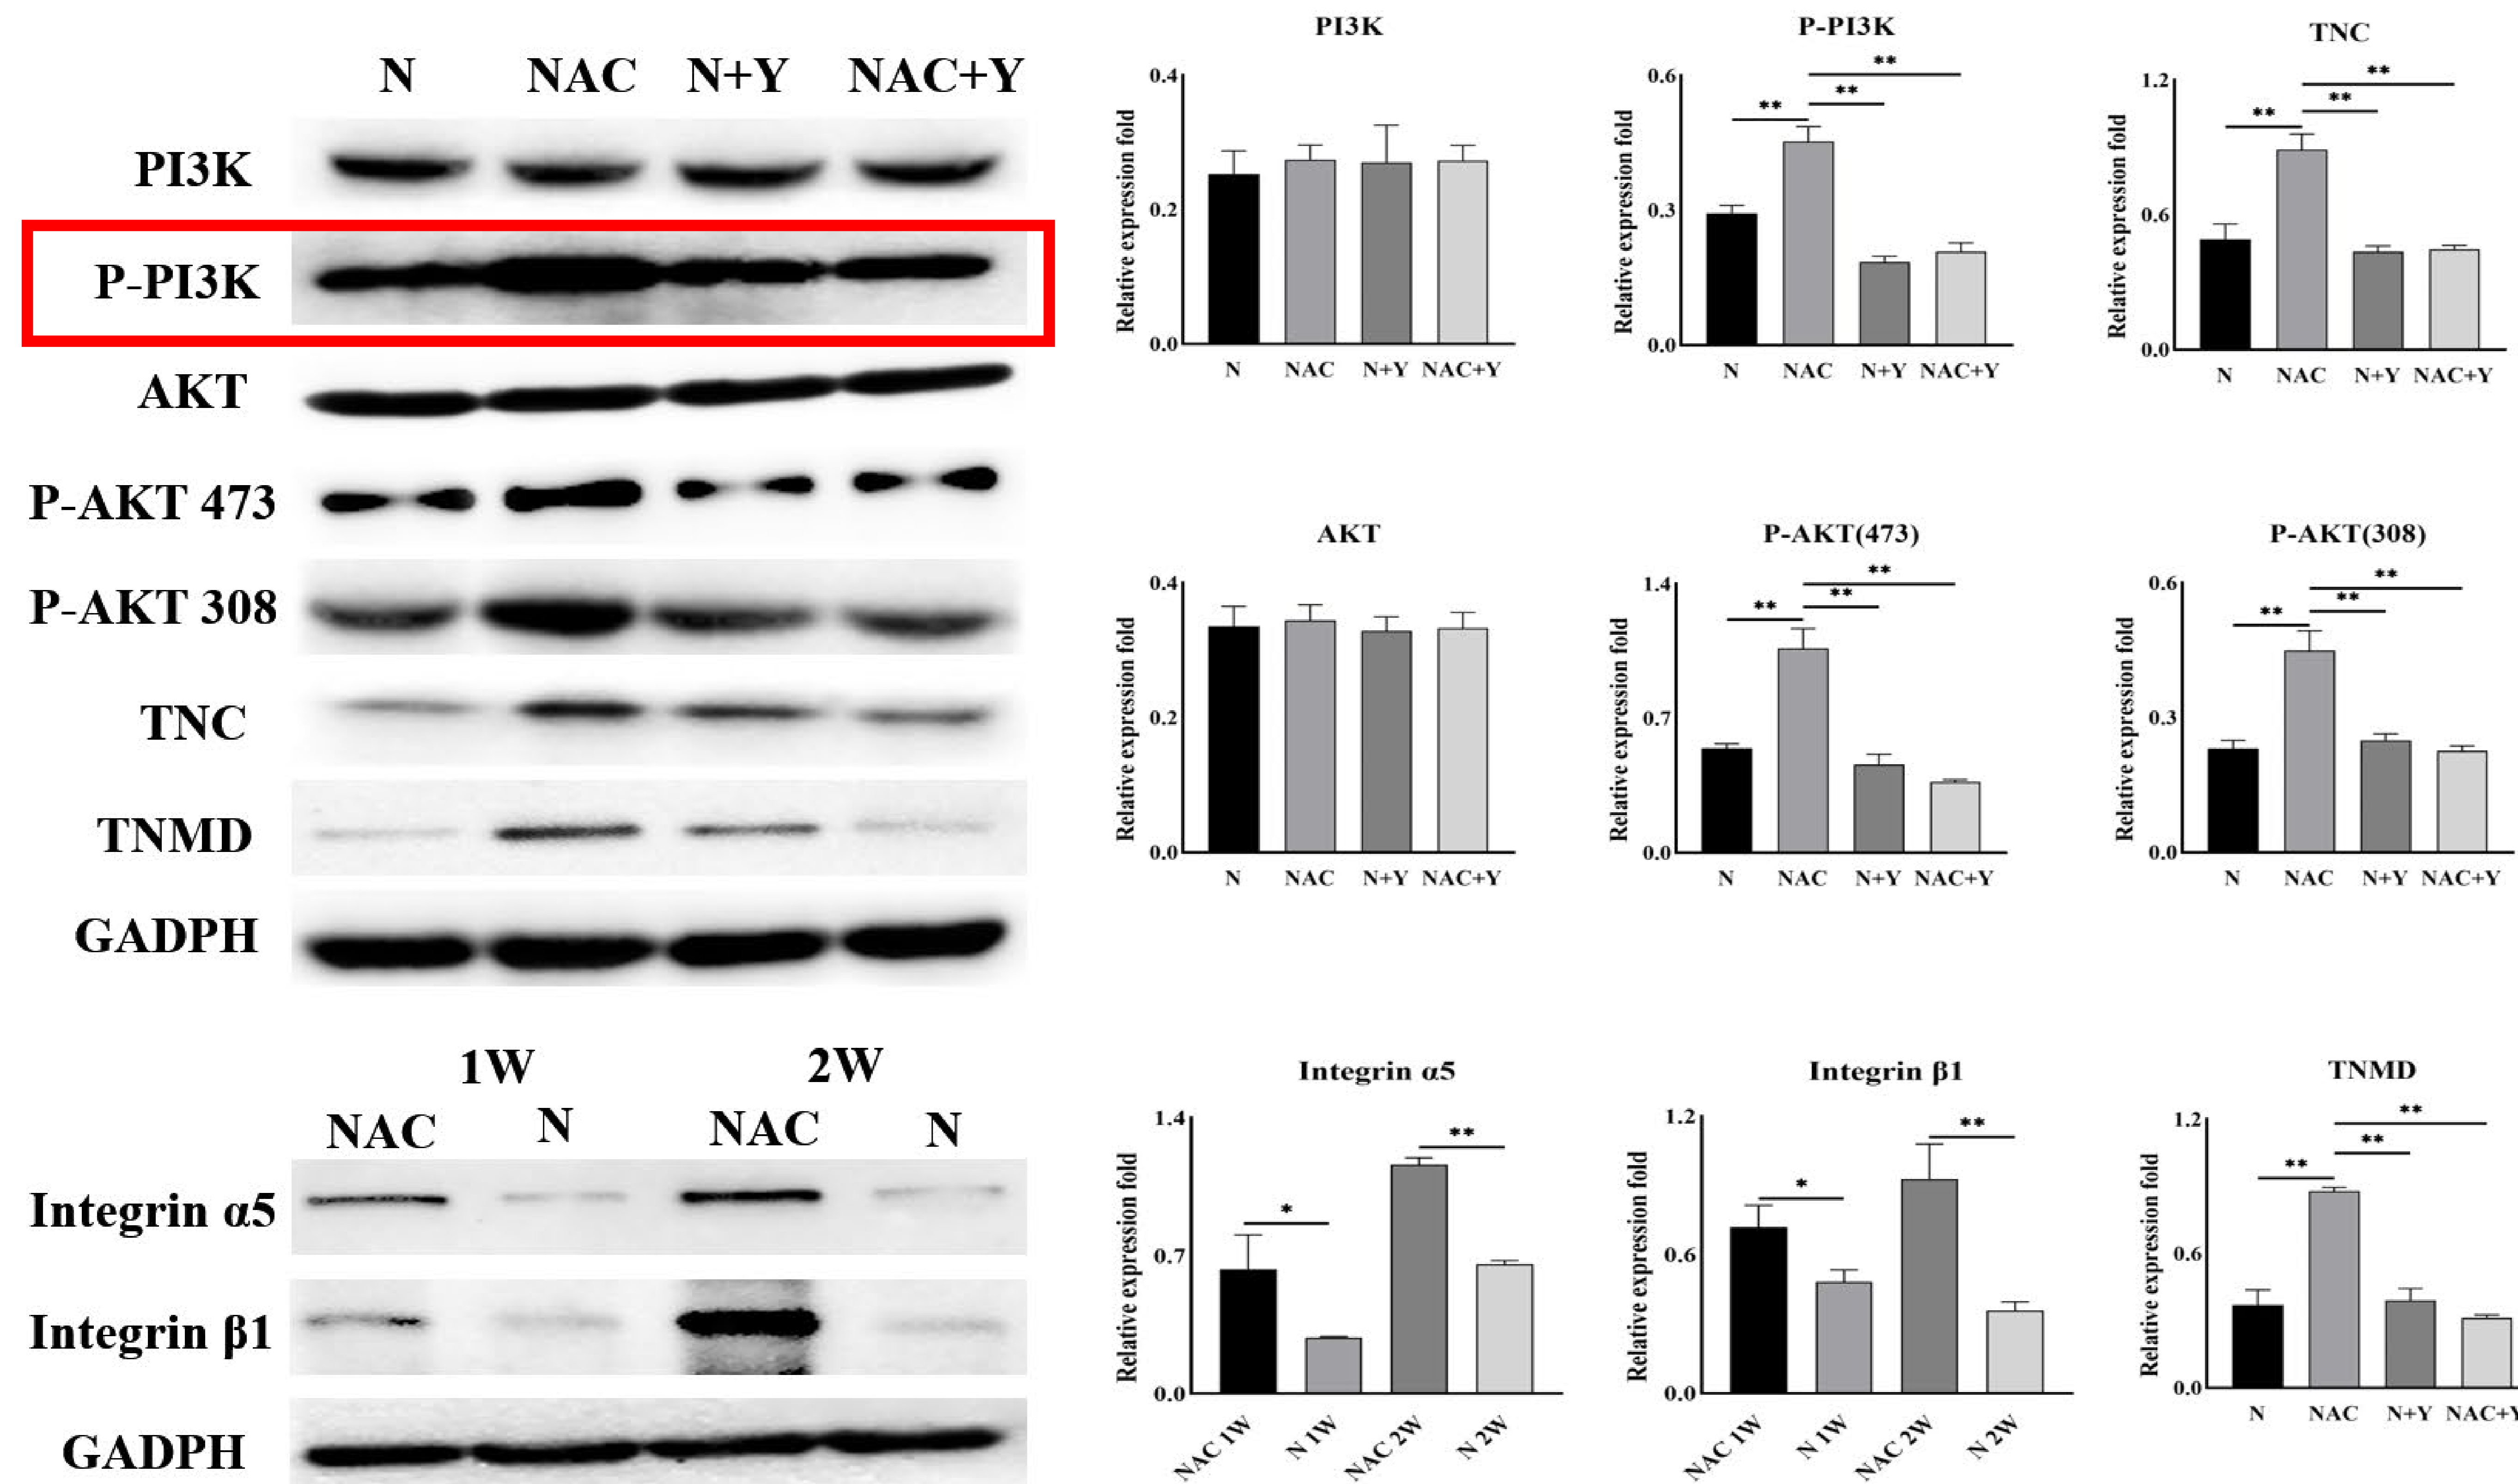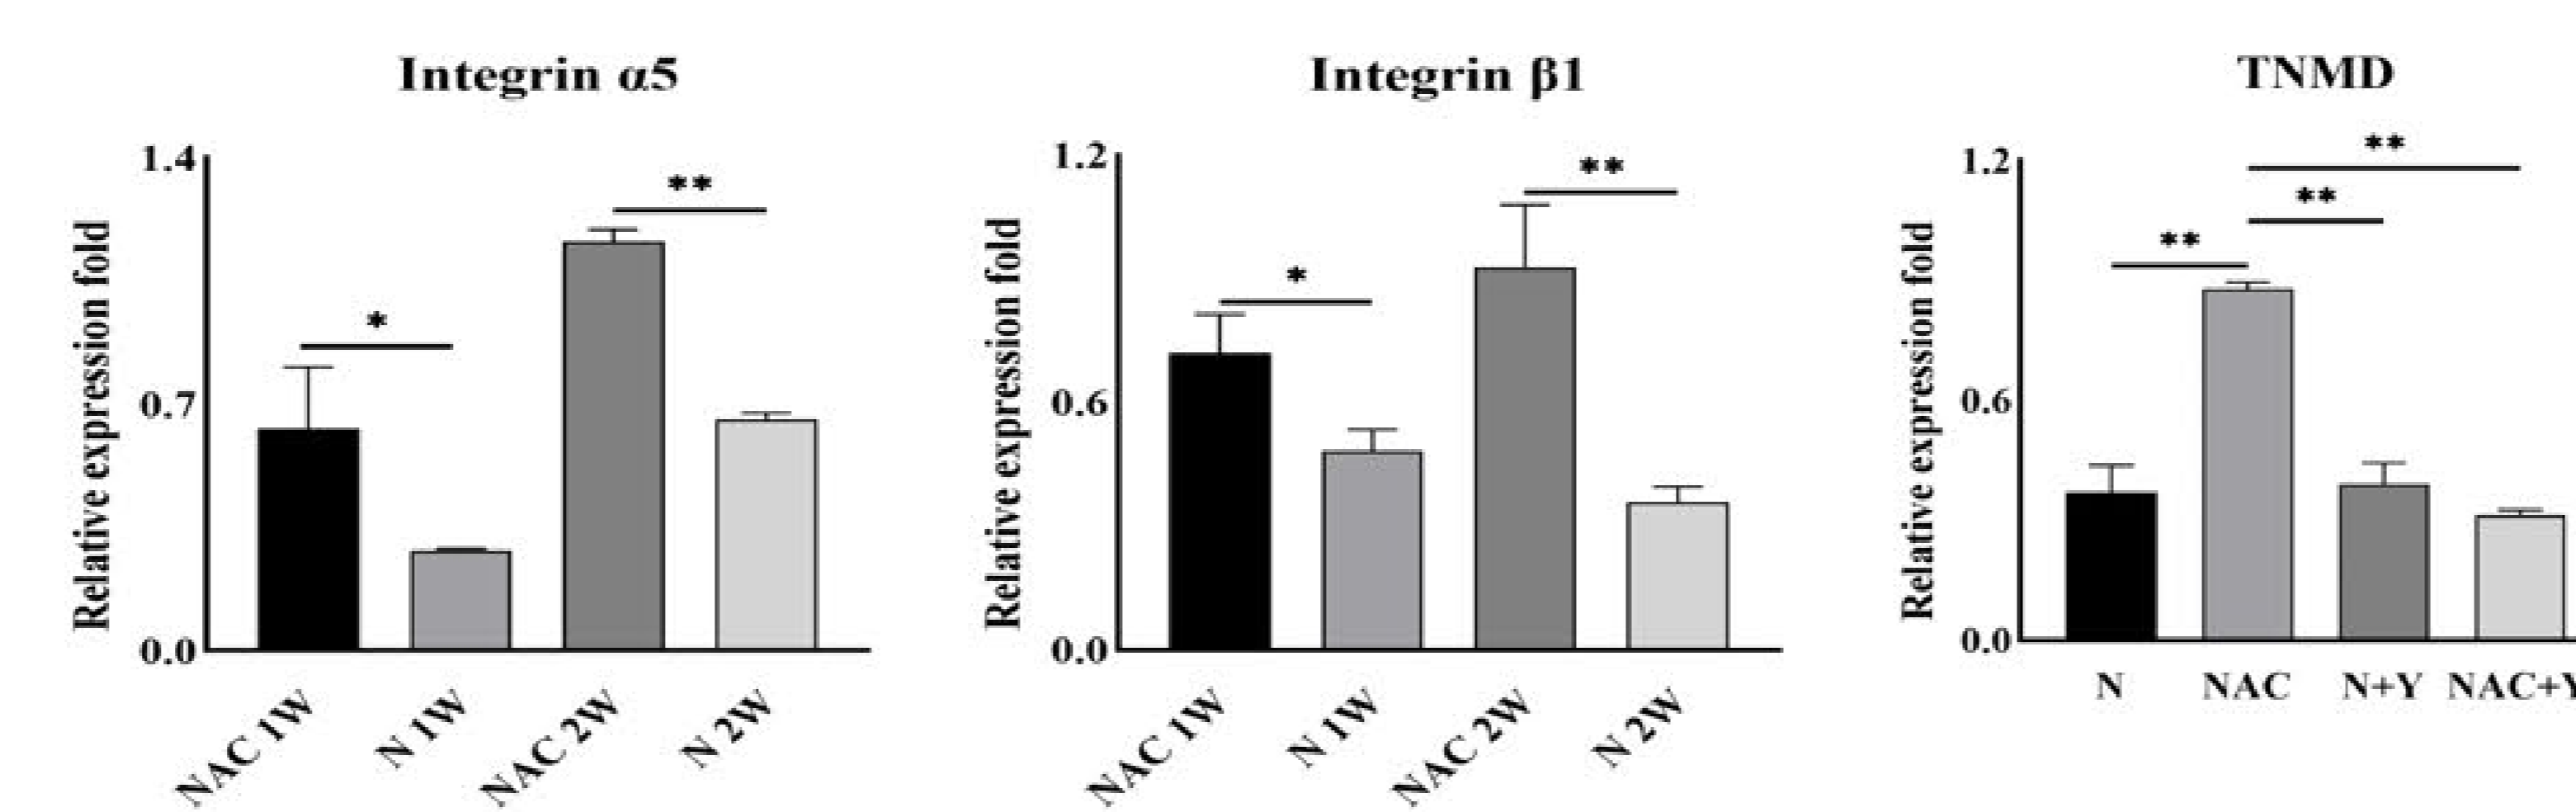

# Fig4B AKT

Three times repeated exposure image

Fig 4

A

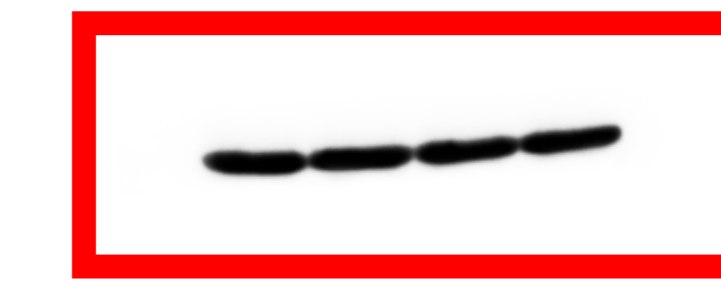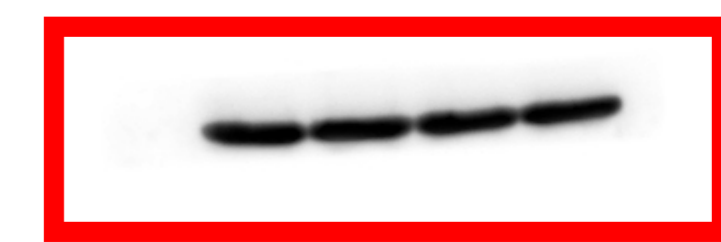

B

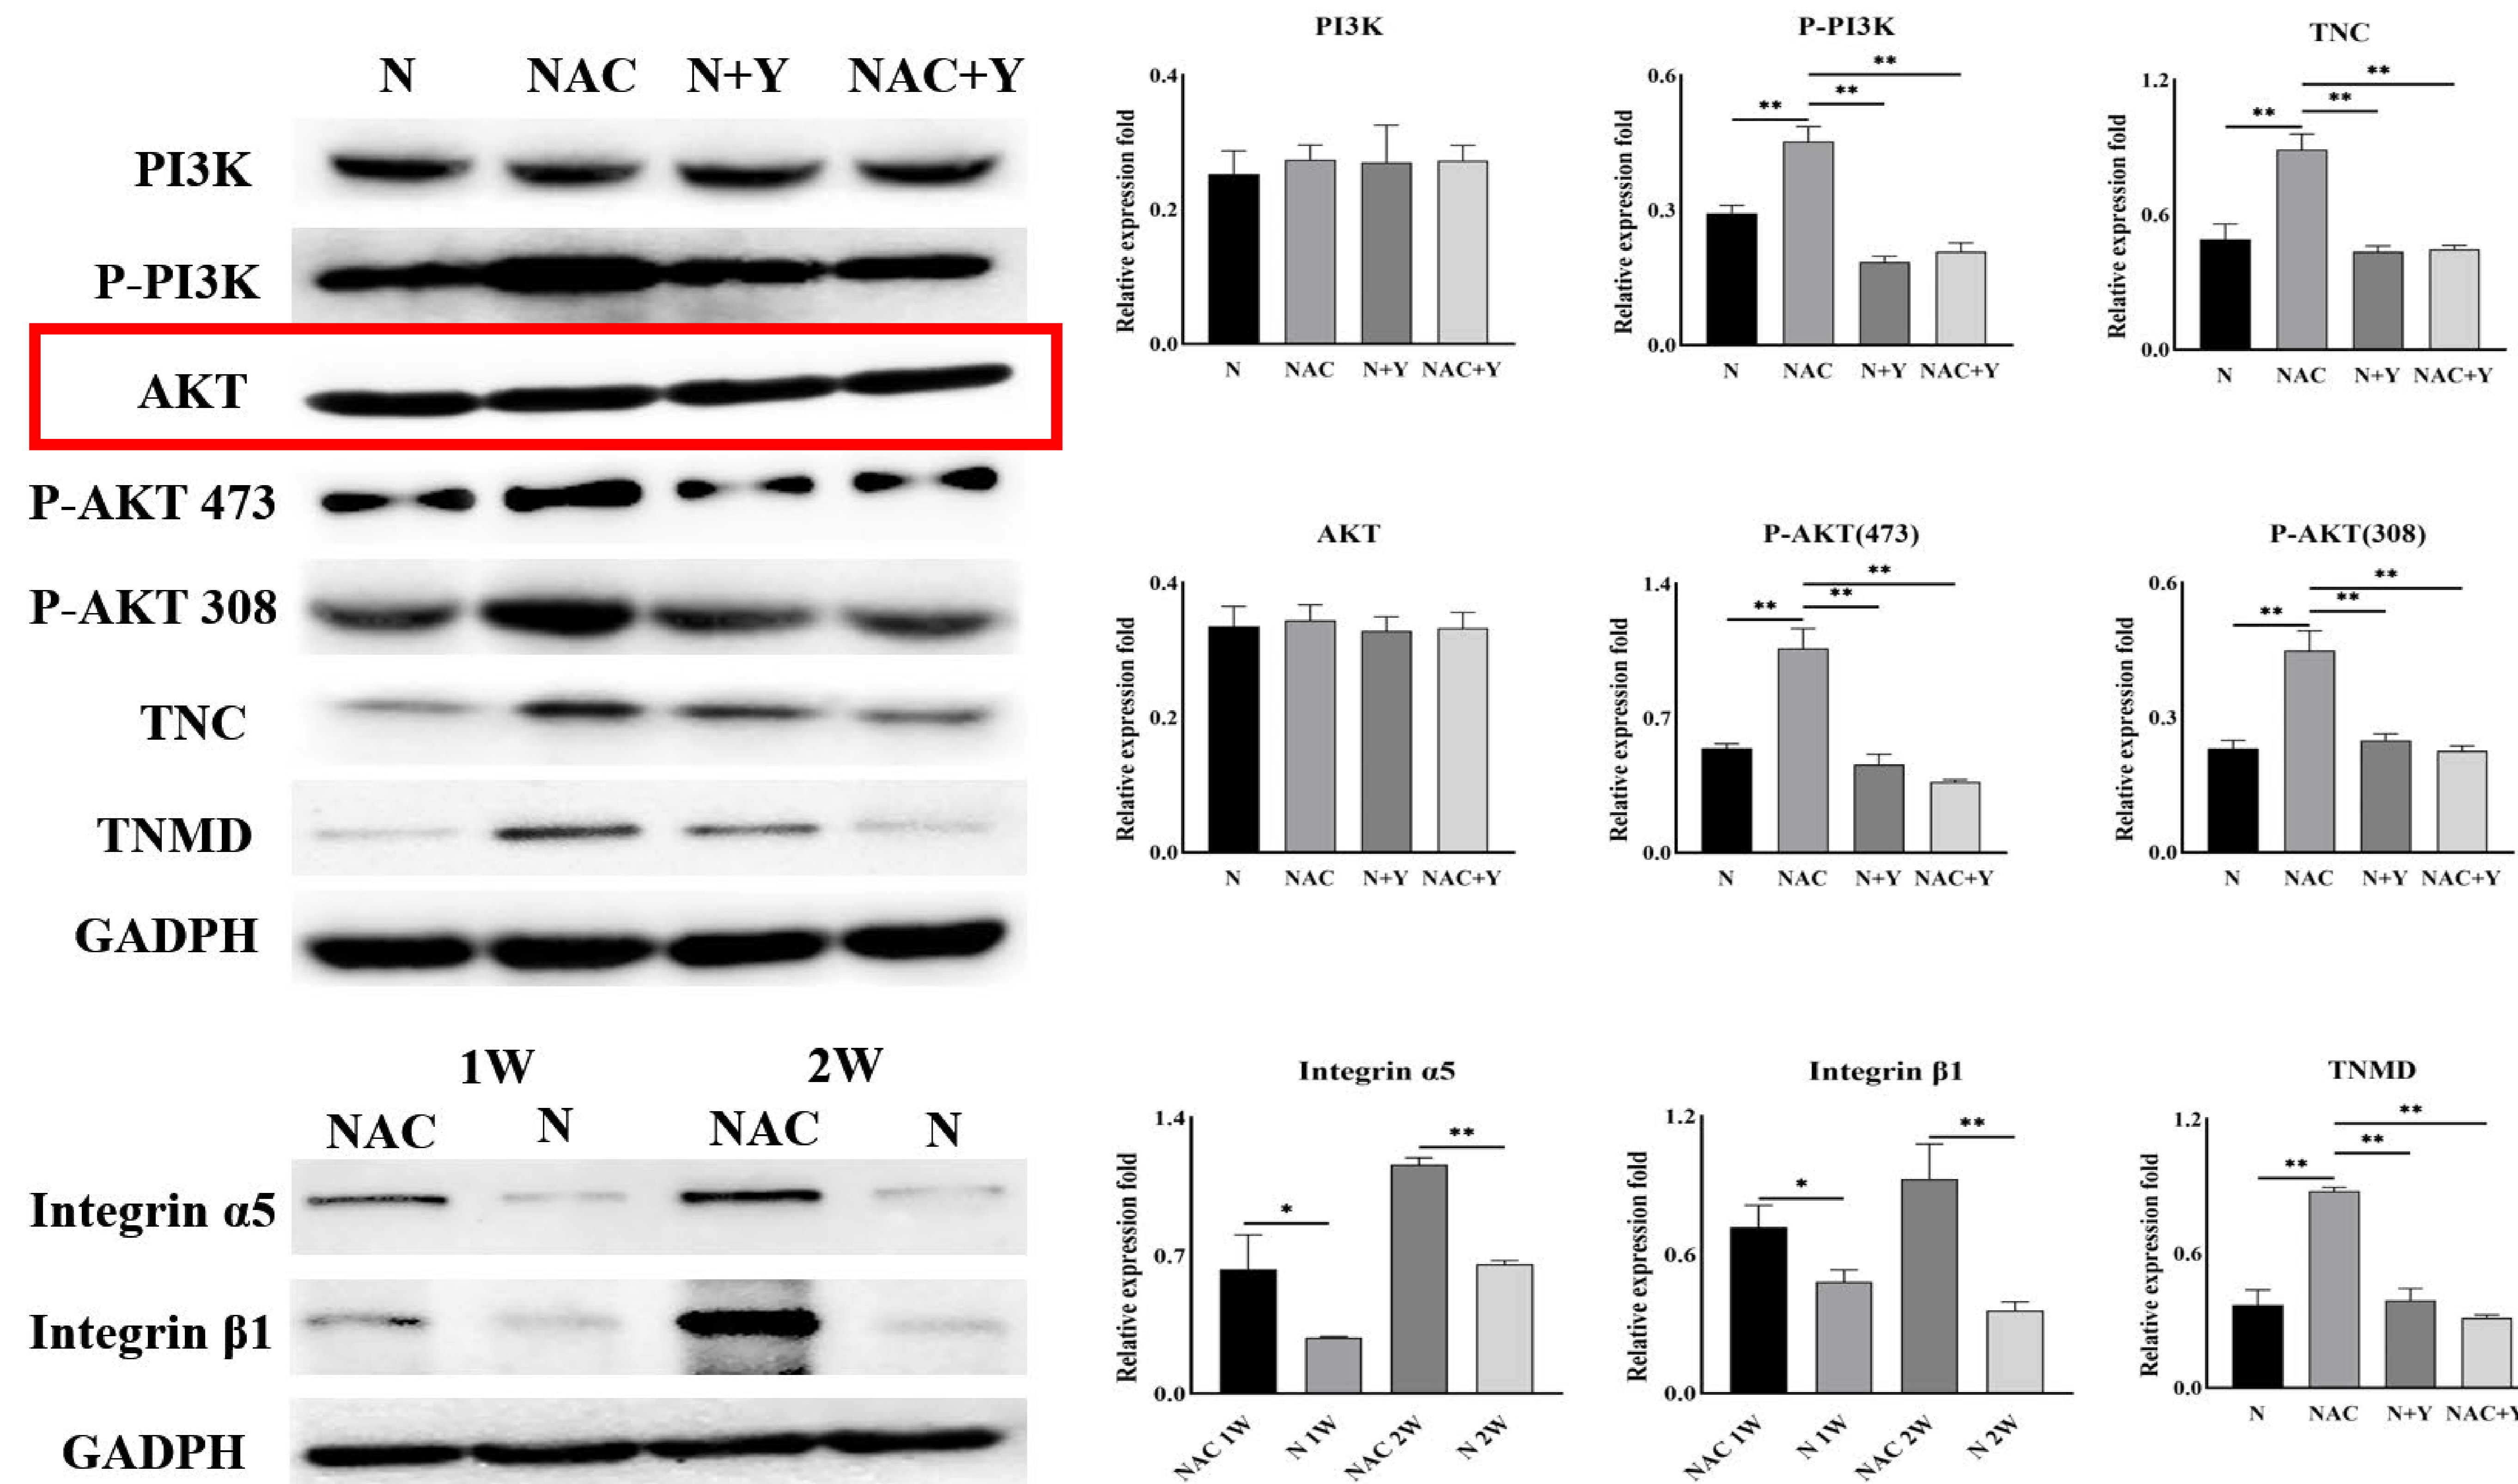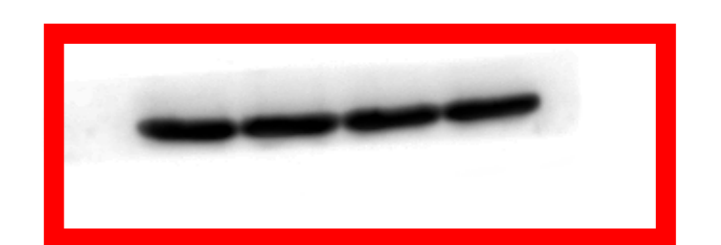

# Fig4B P-AKT473

Three times repeated exposure image

Fig 4

A

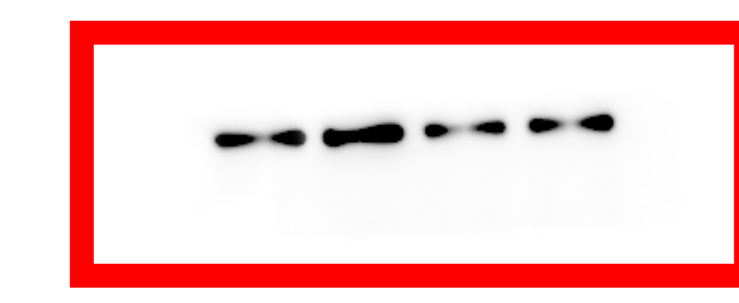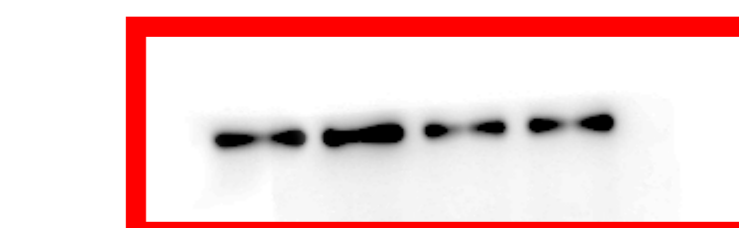

B

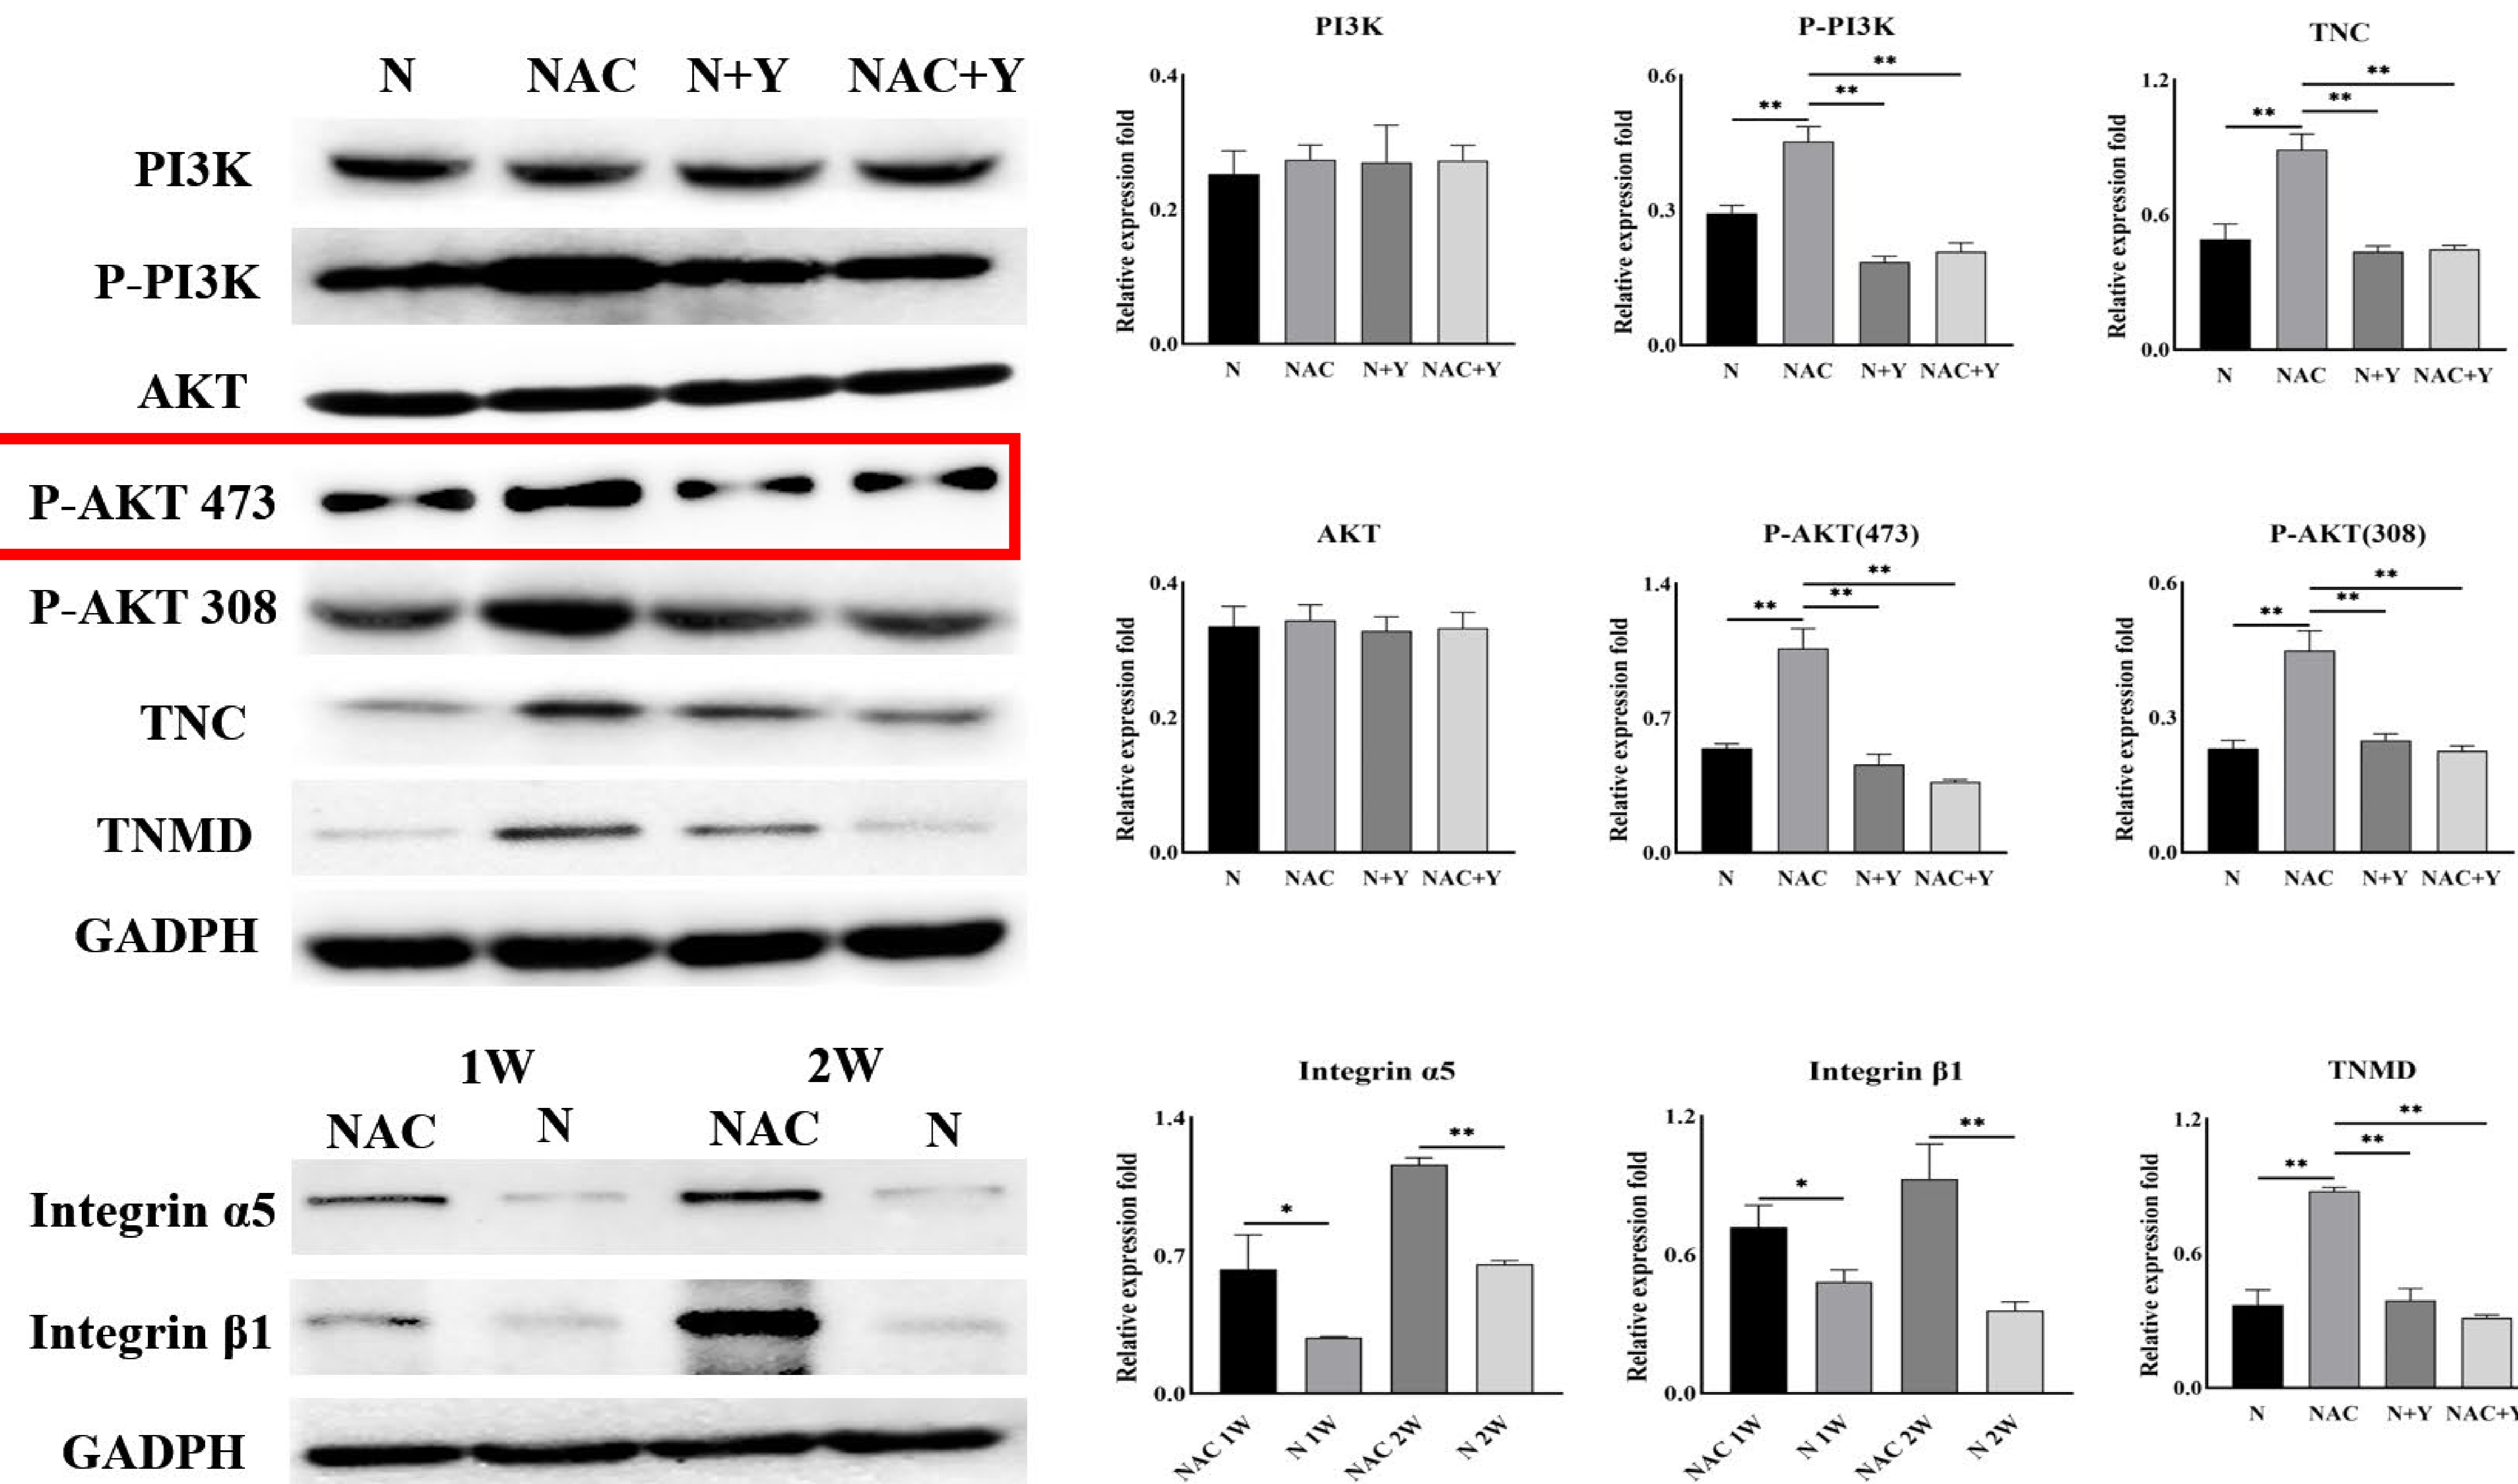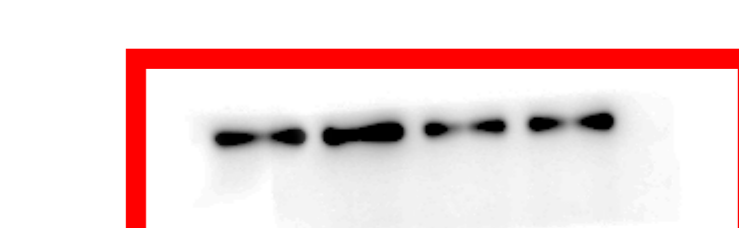

# Fig4B P-AKT308

Three times repeated exposure image

Fig 4

A

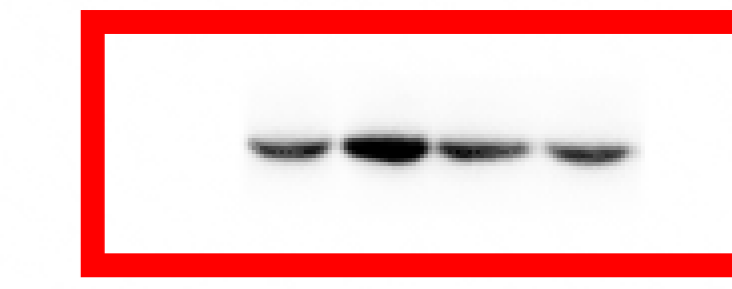

B

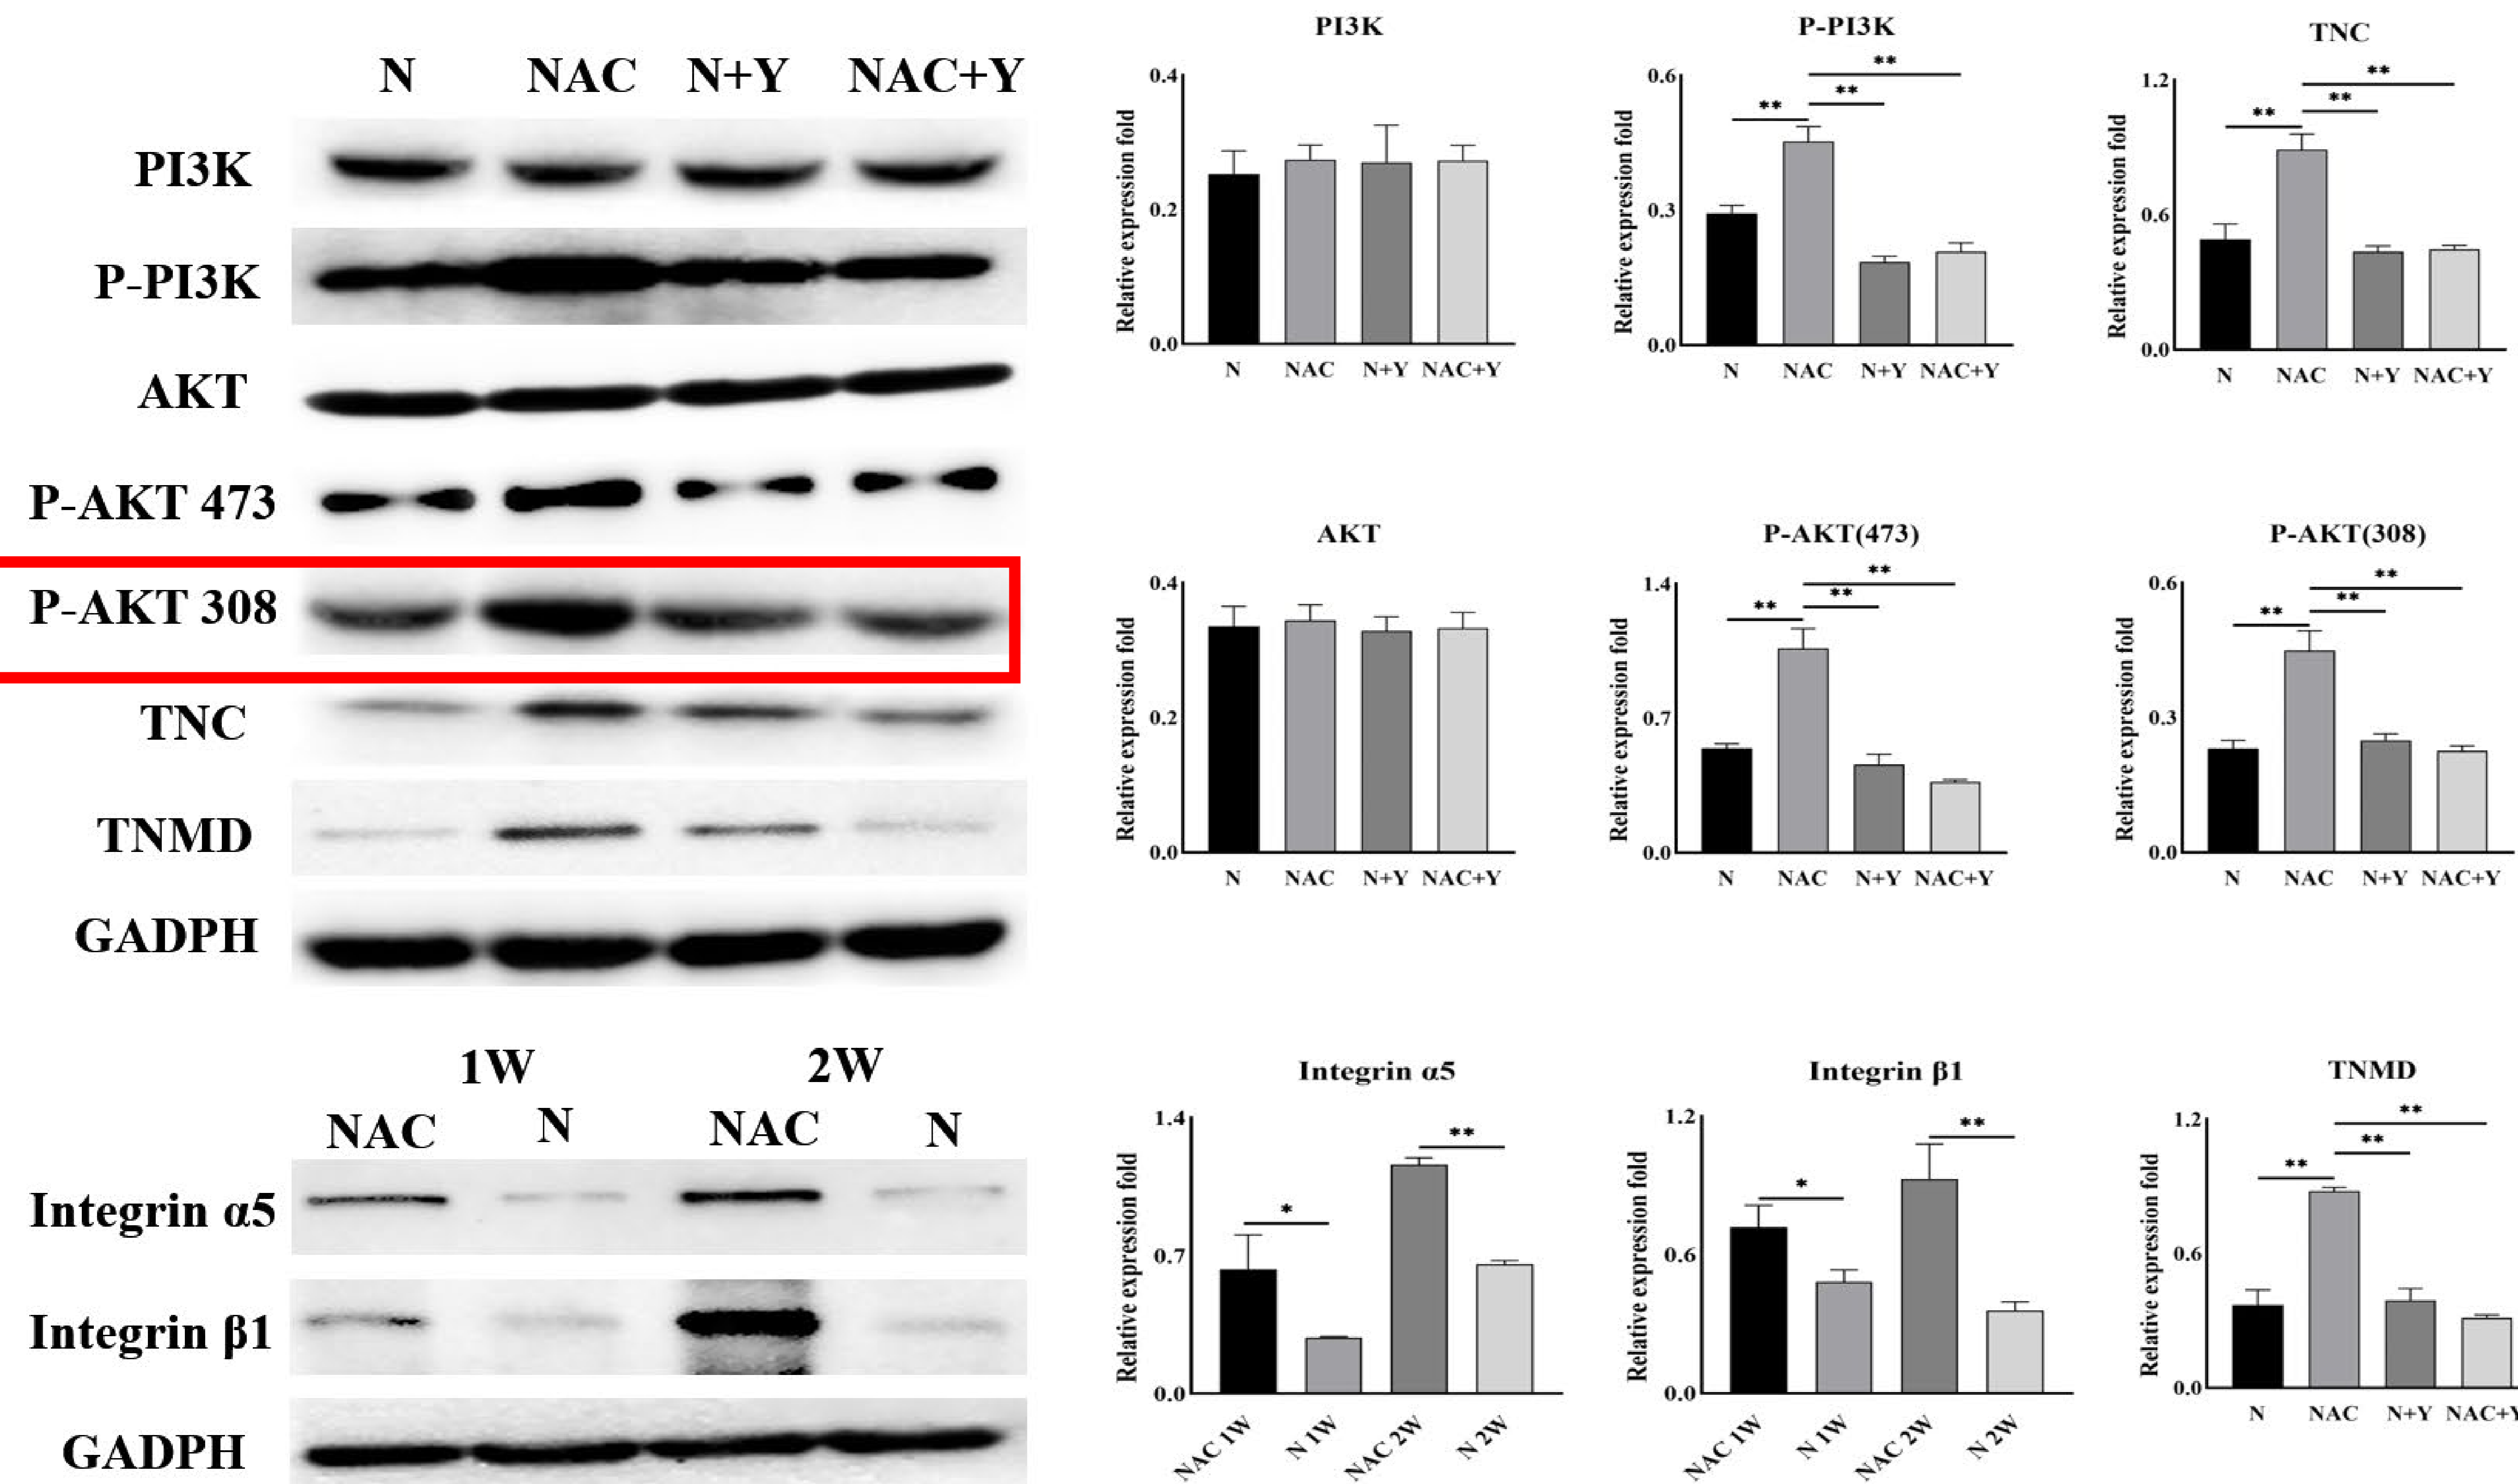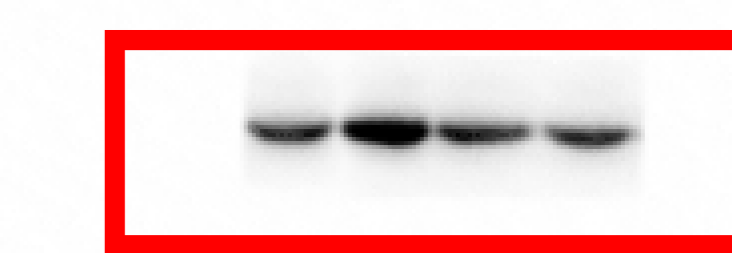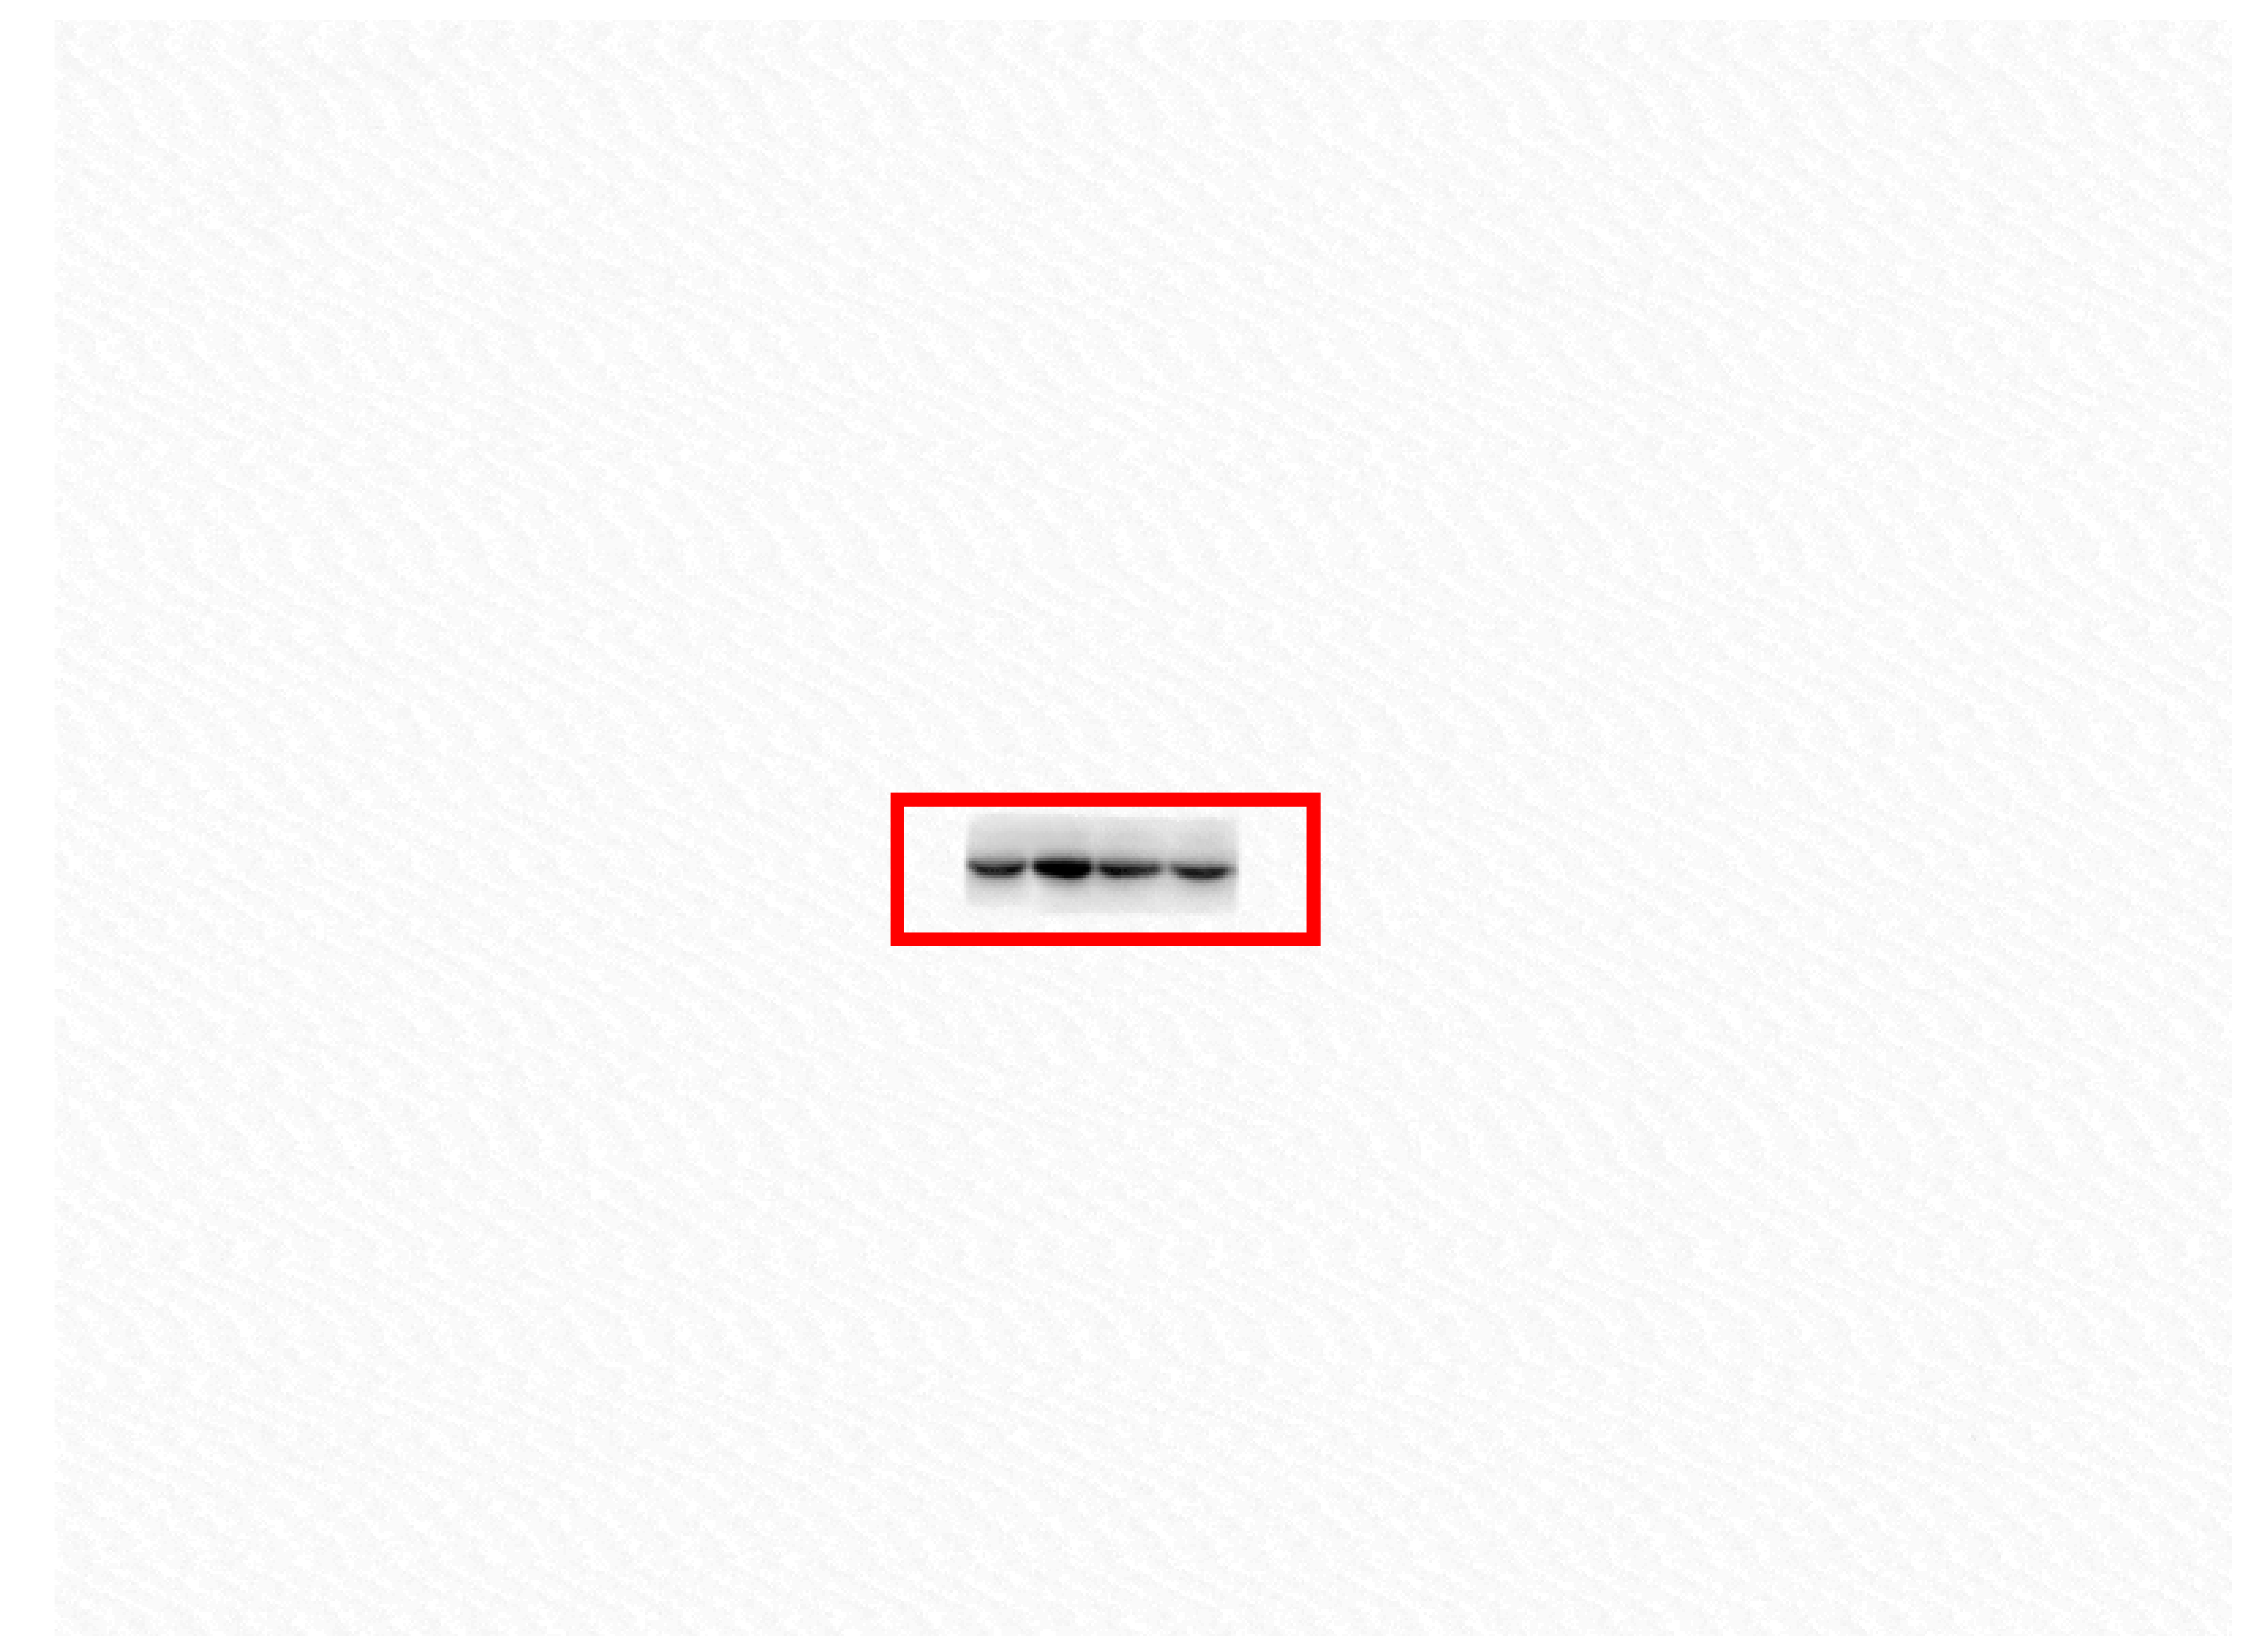

# Fig4B TNC

Three times repeated exposure image

Fig 4

A

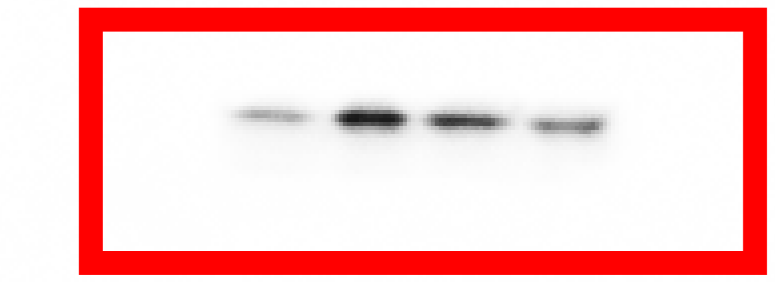

B

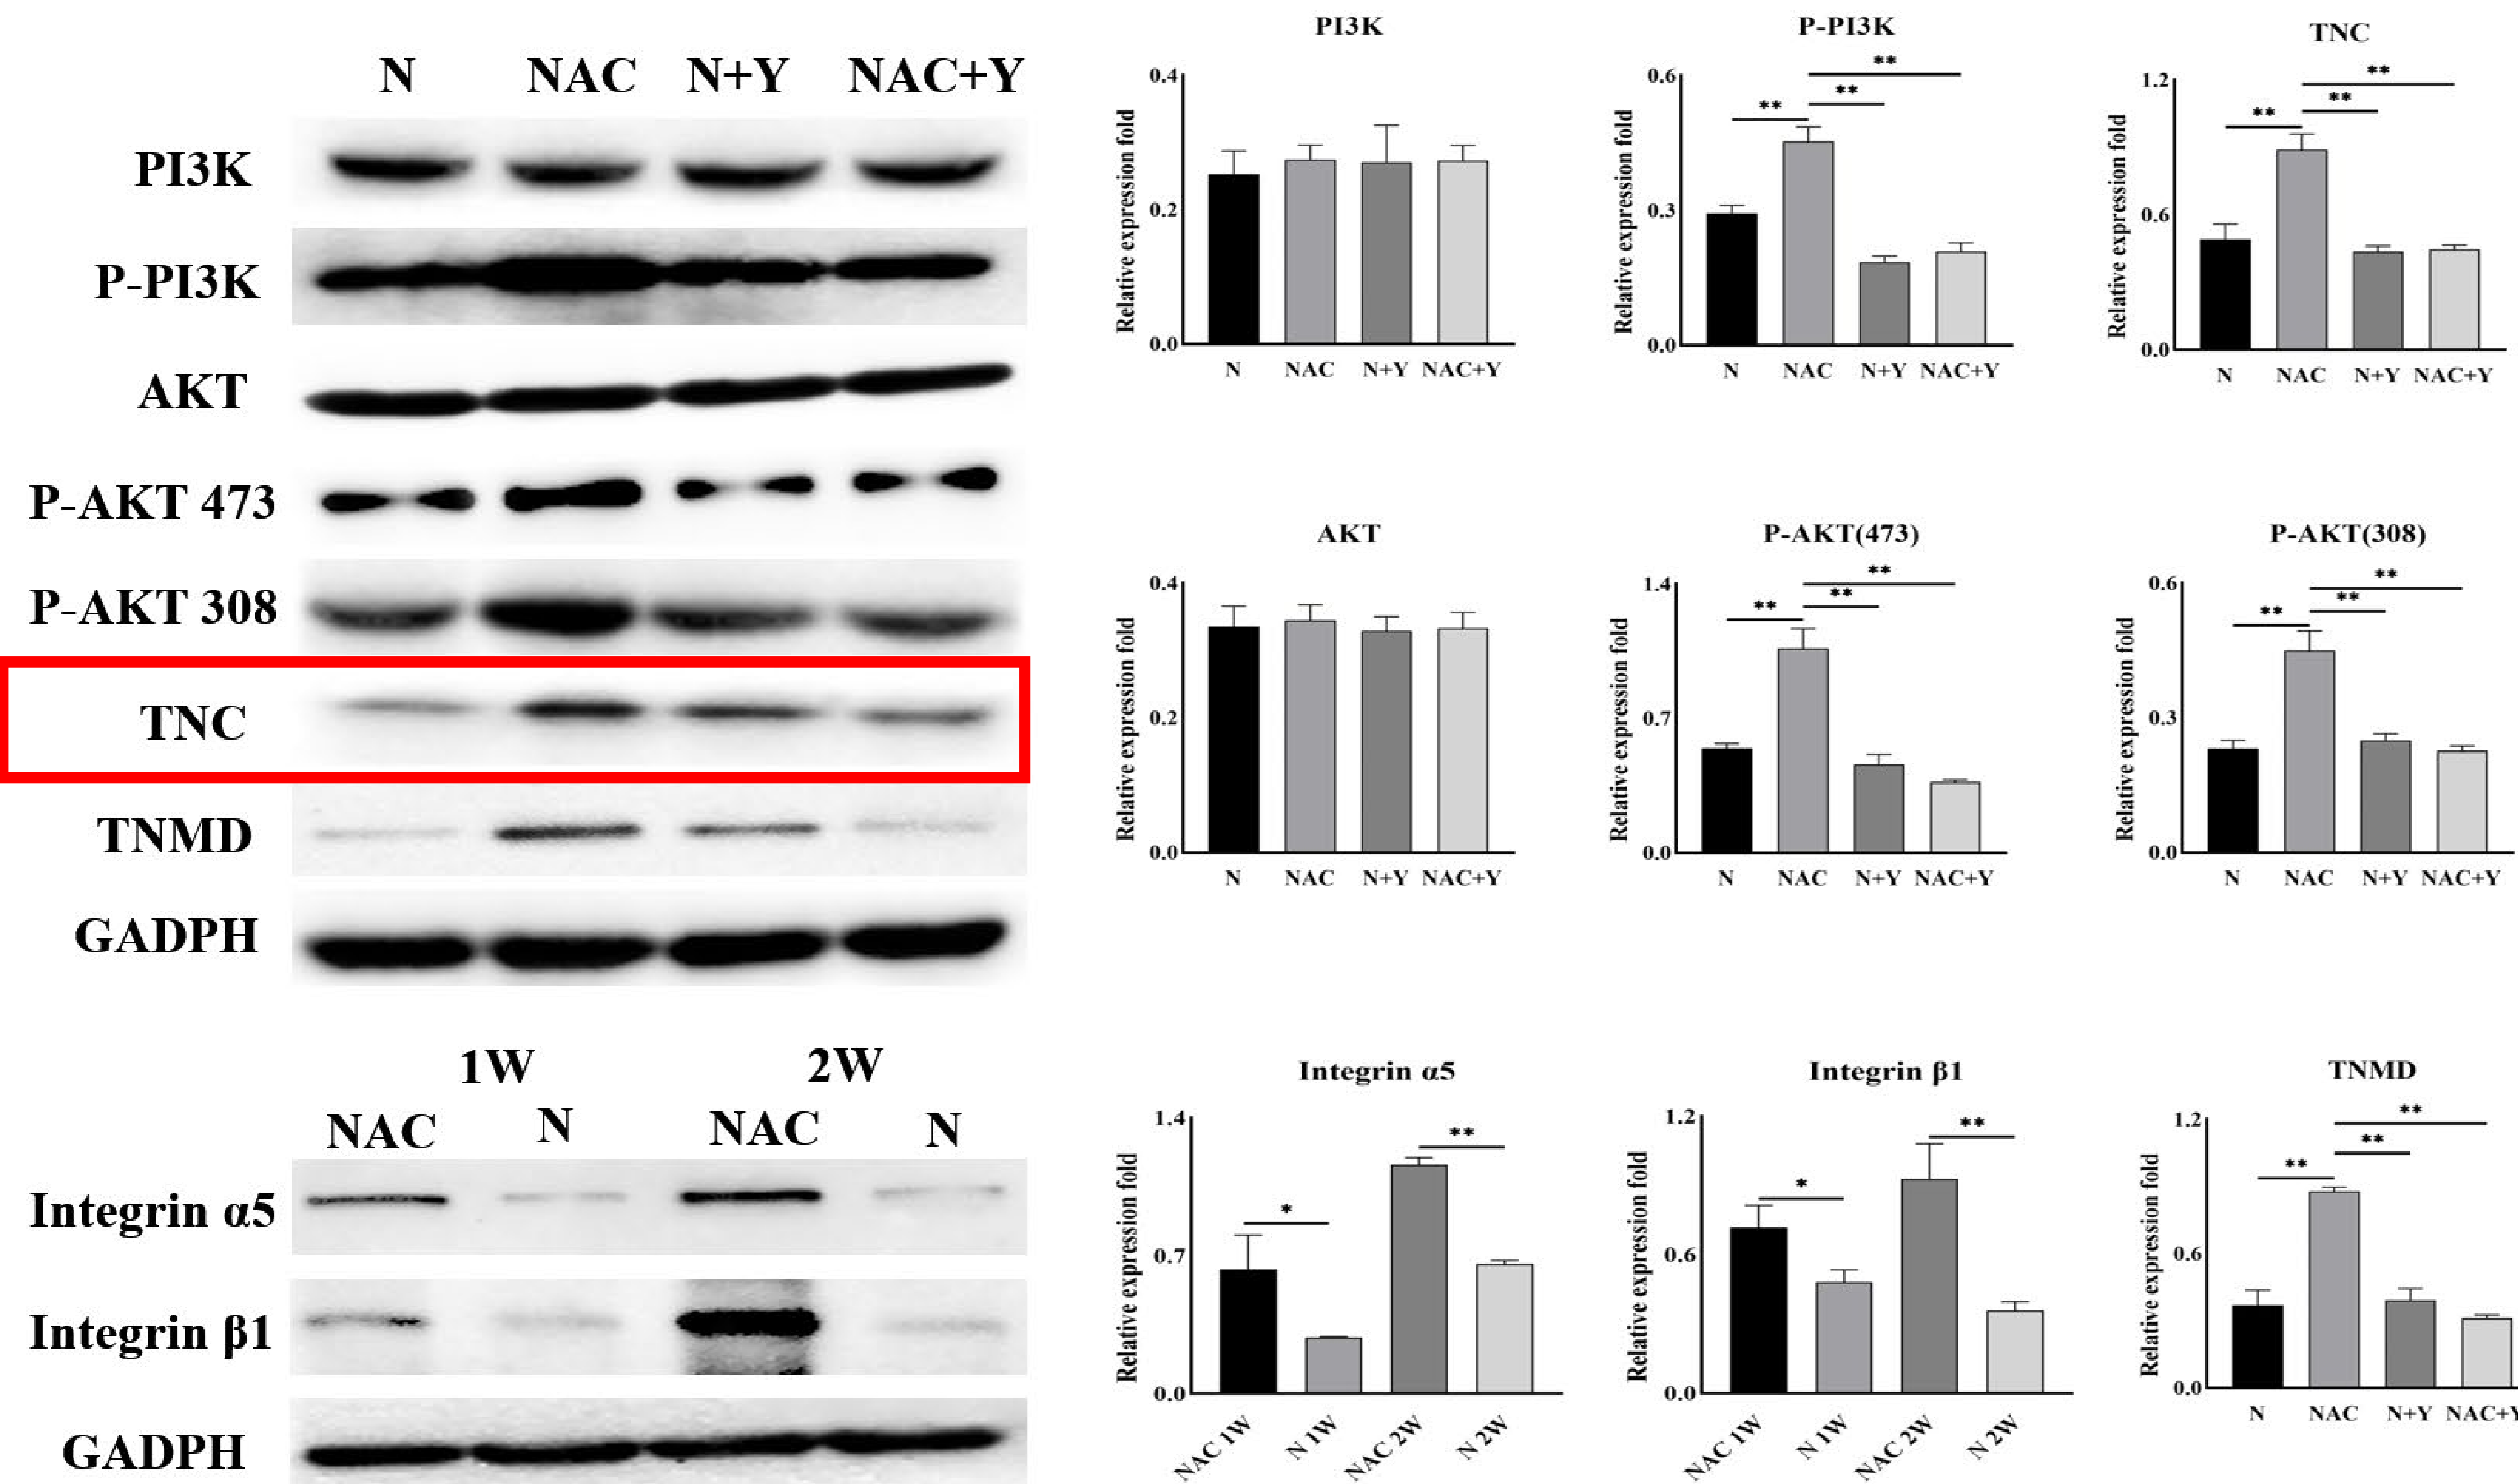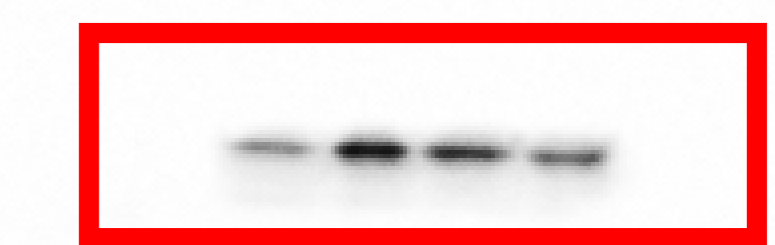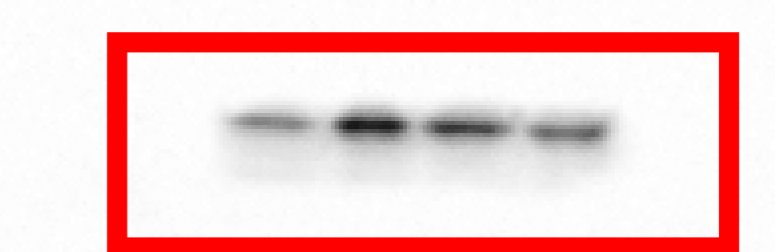

# Fig4B TNMD

Three times repeated exposure image

Fig 4

A

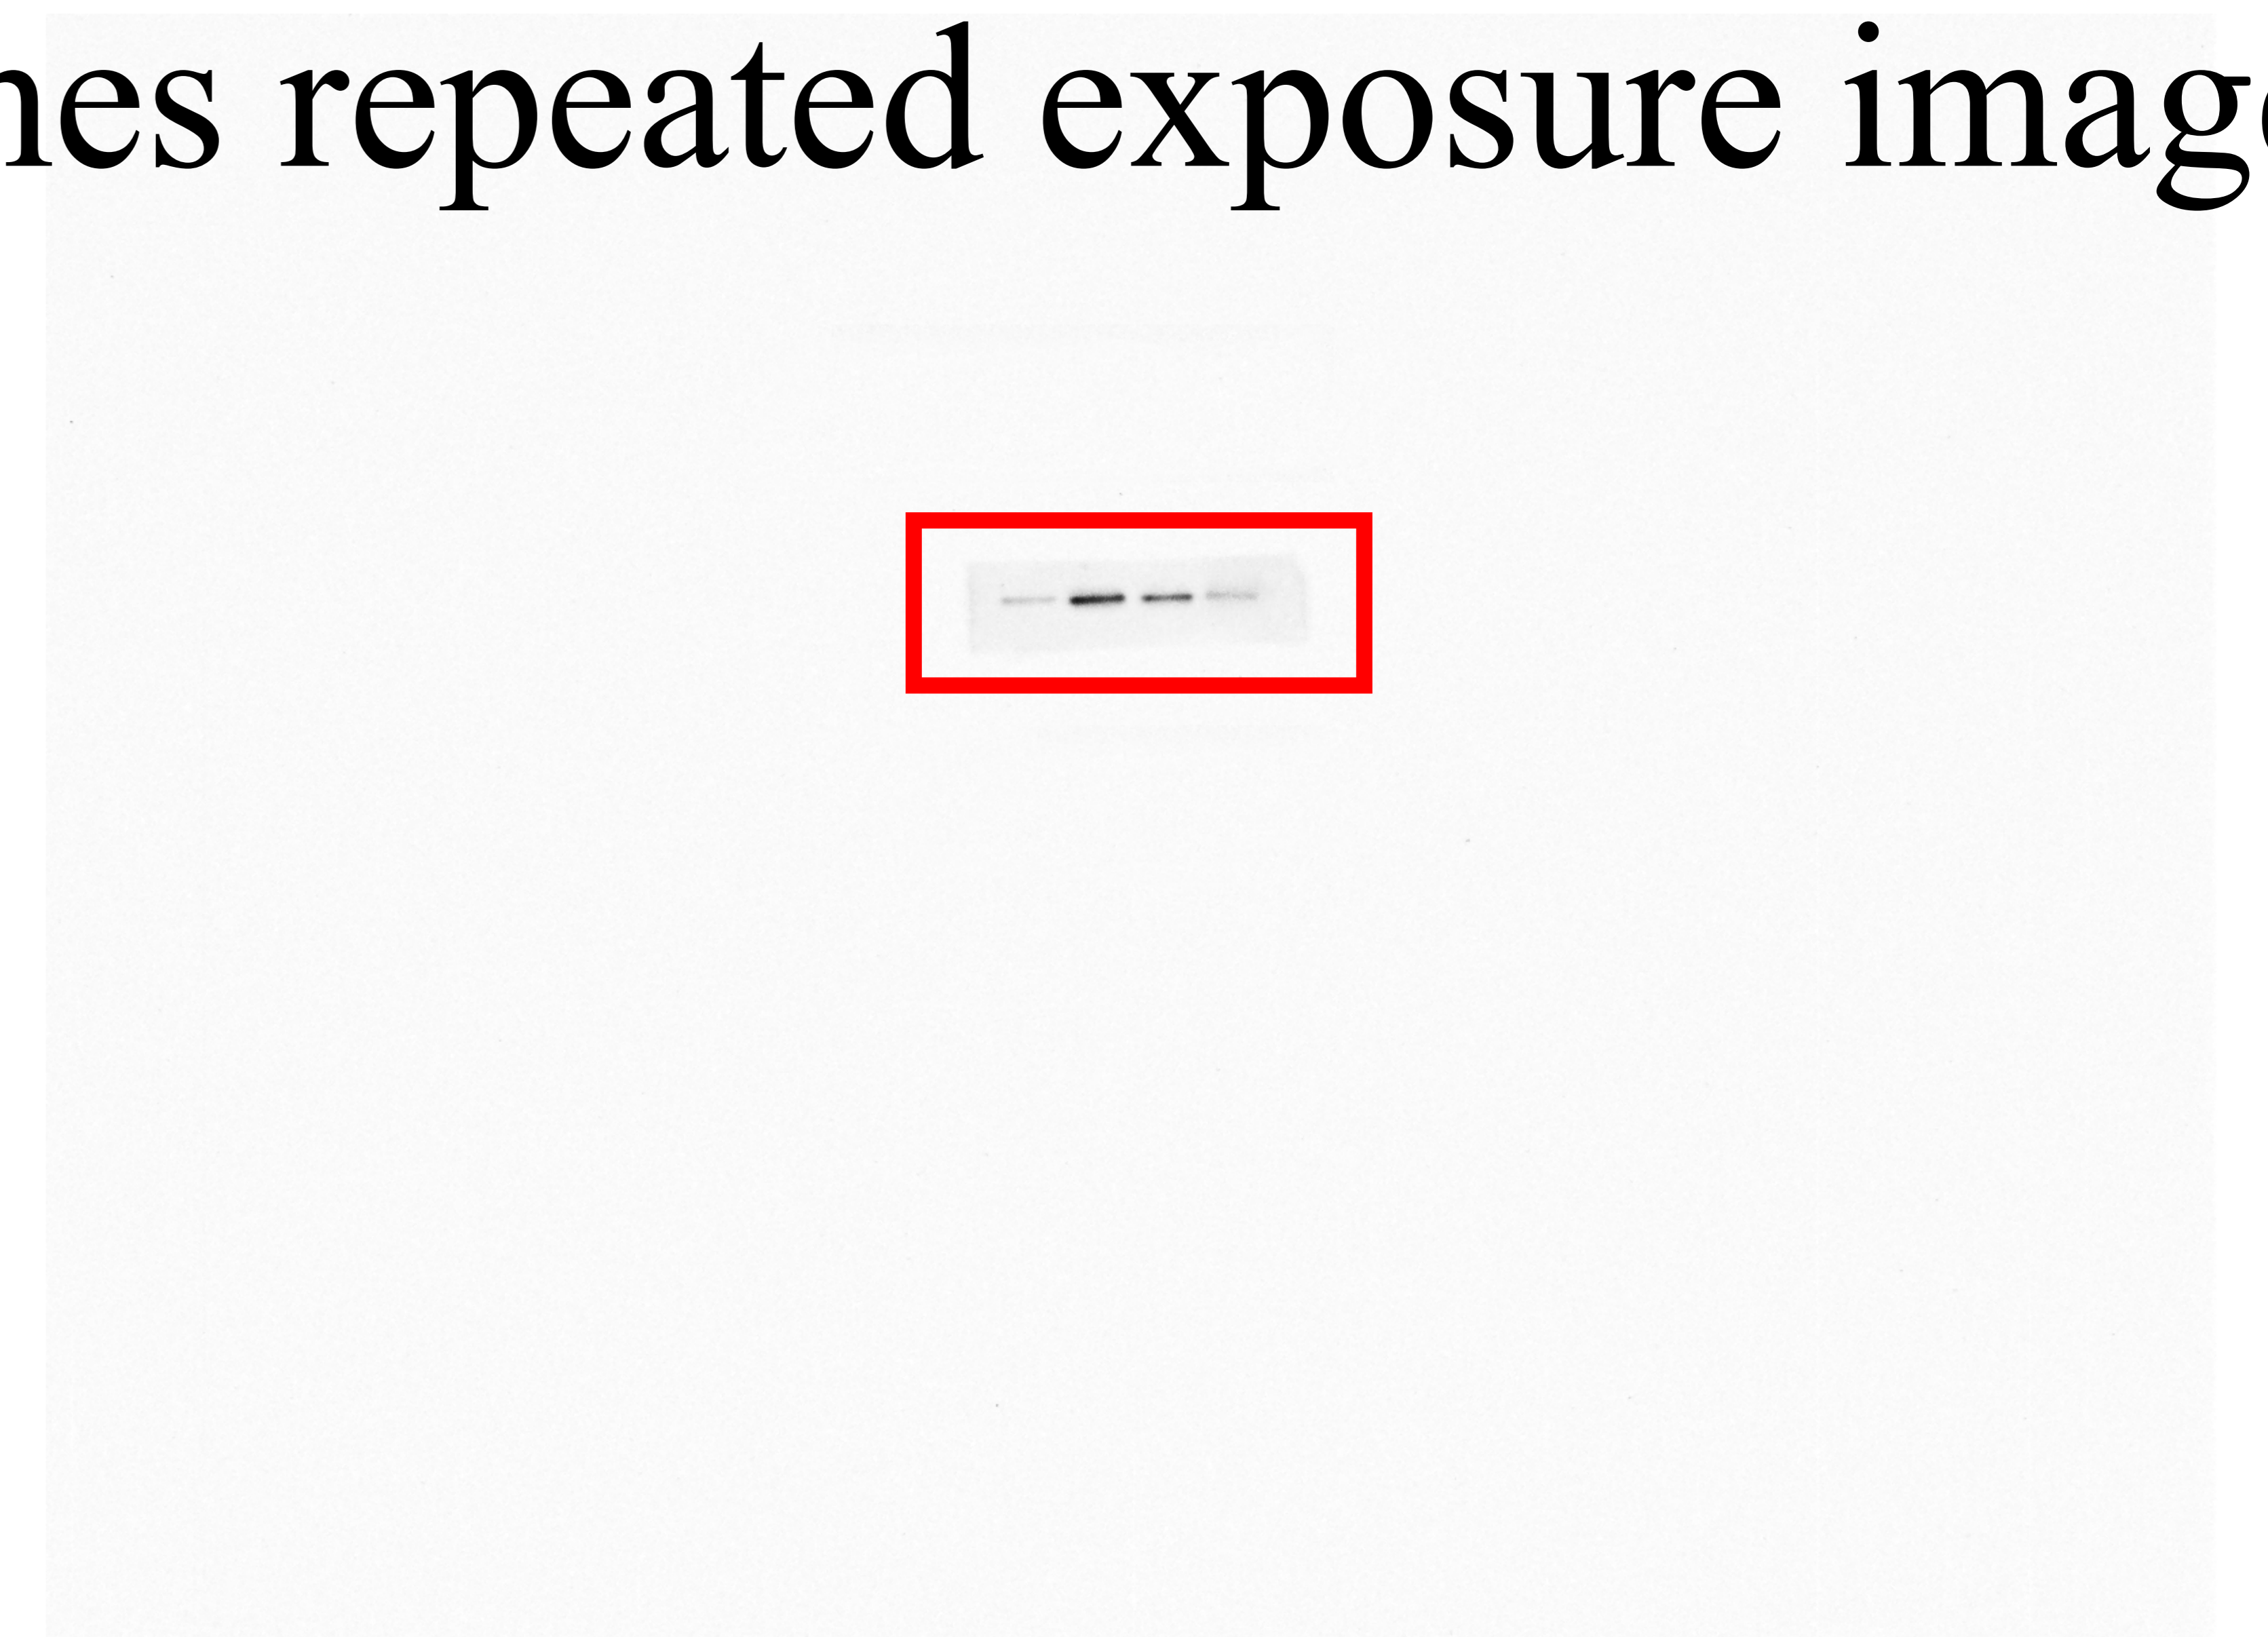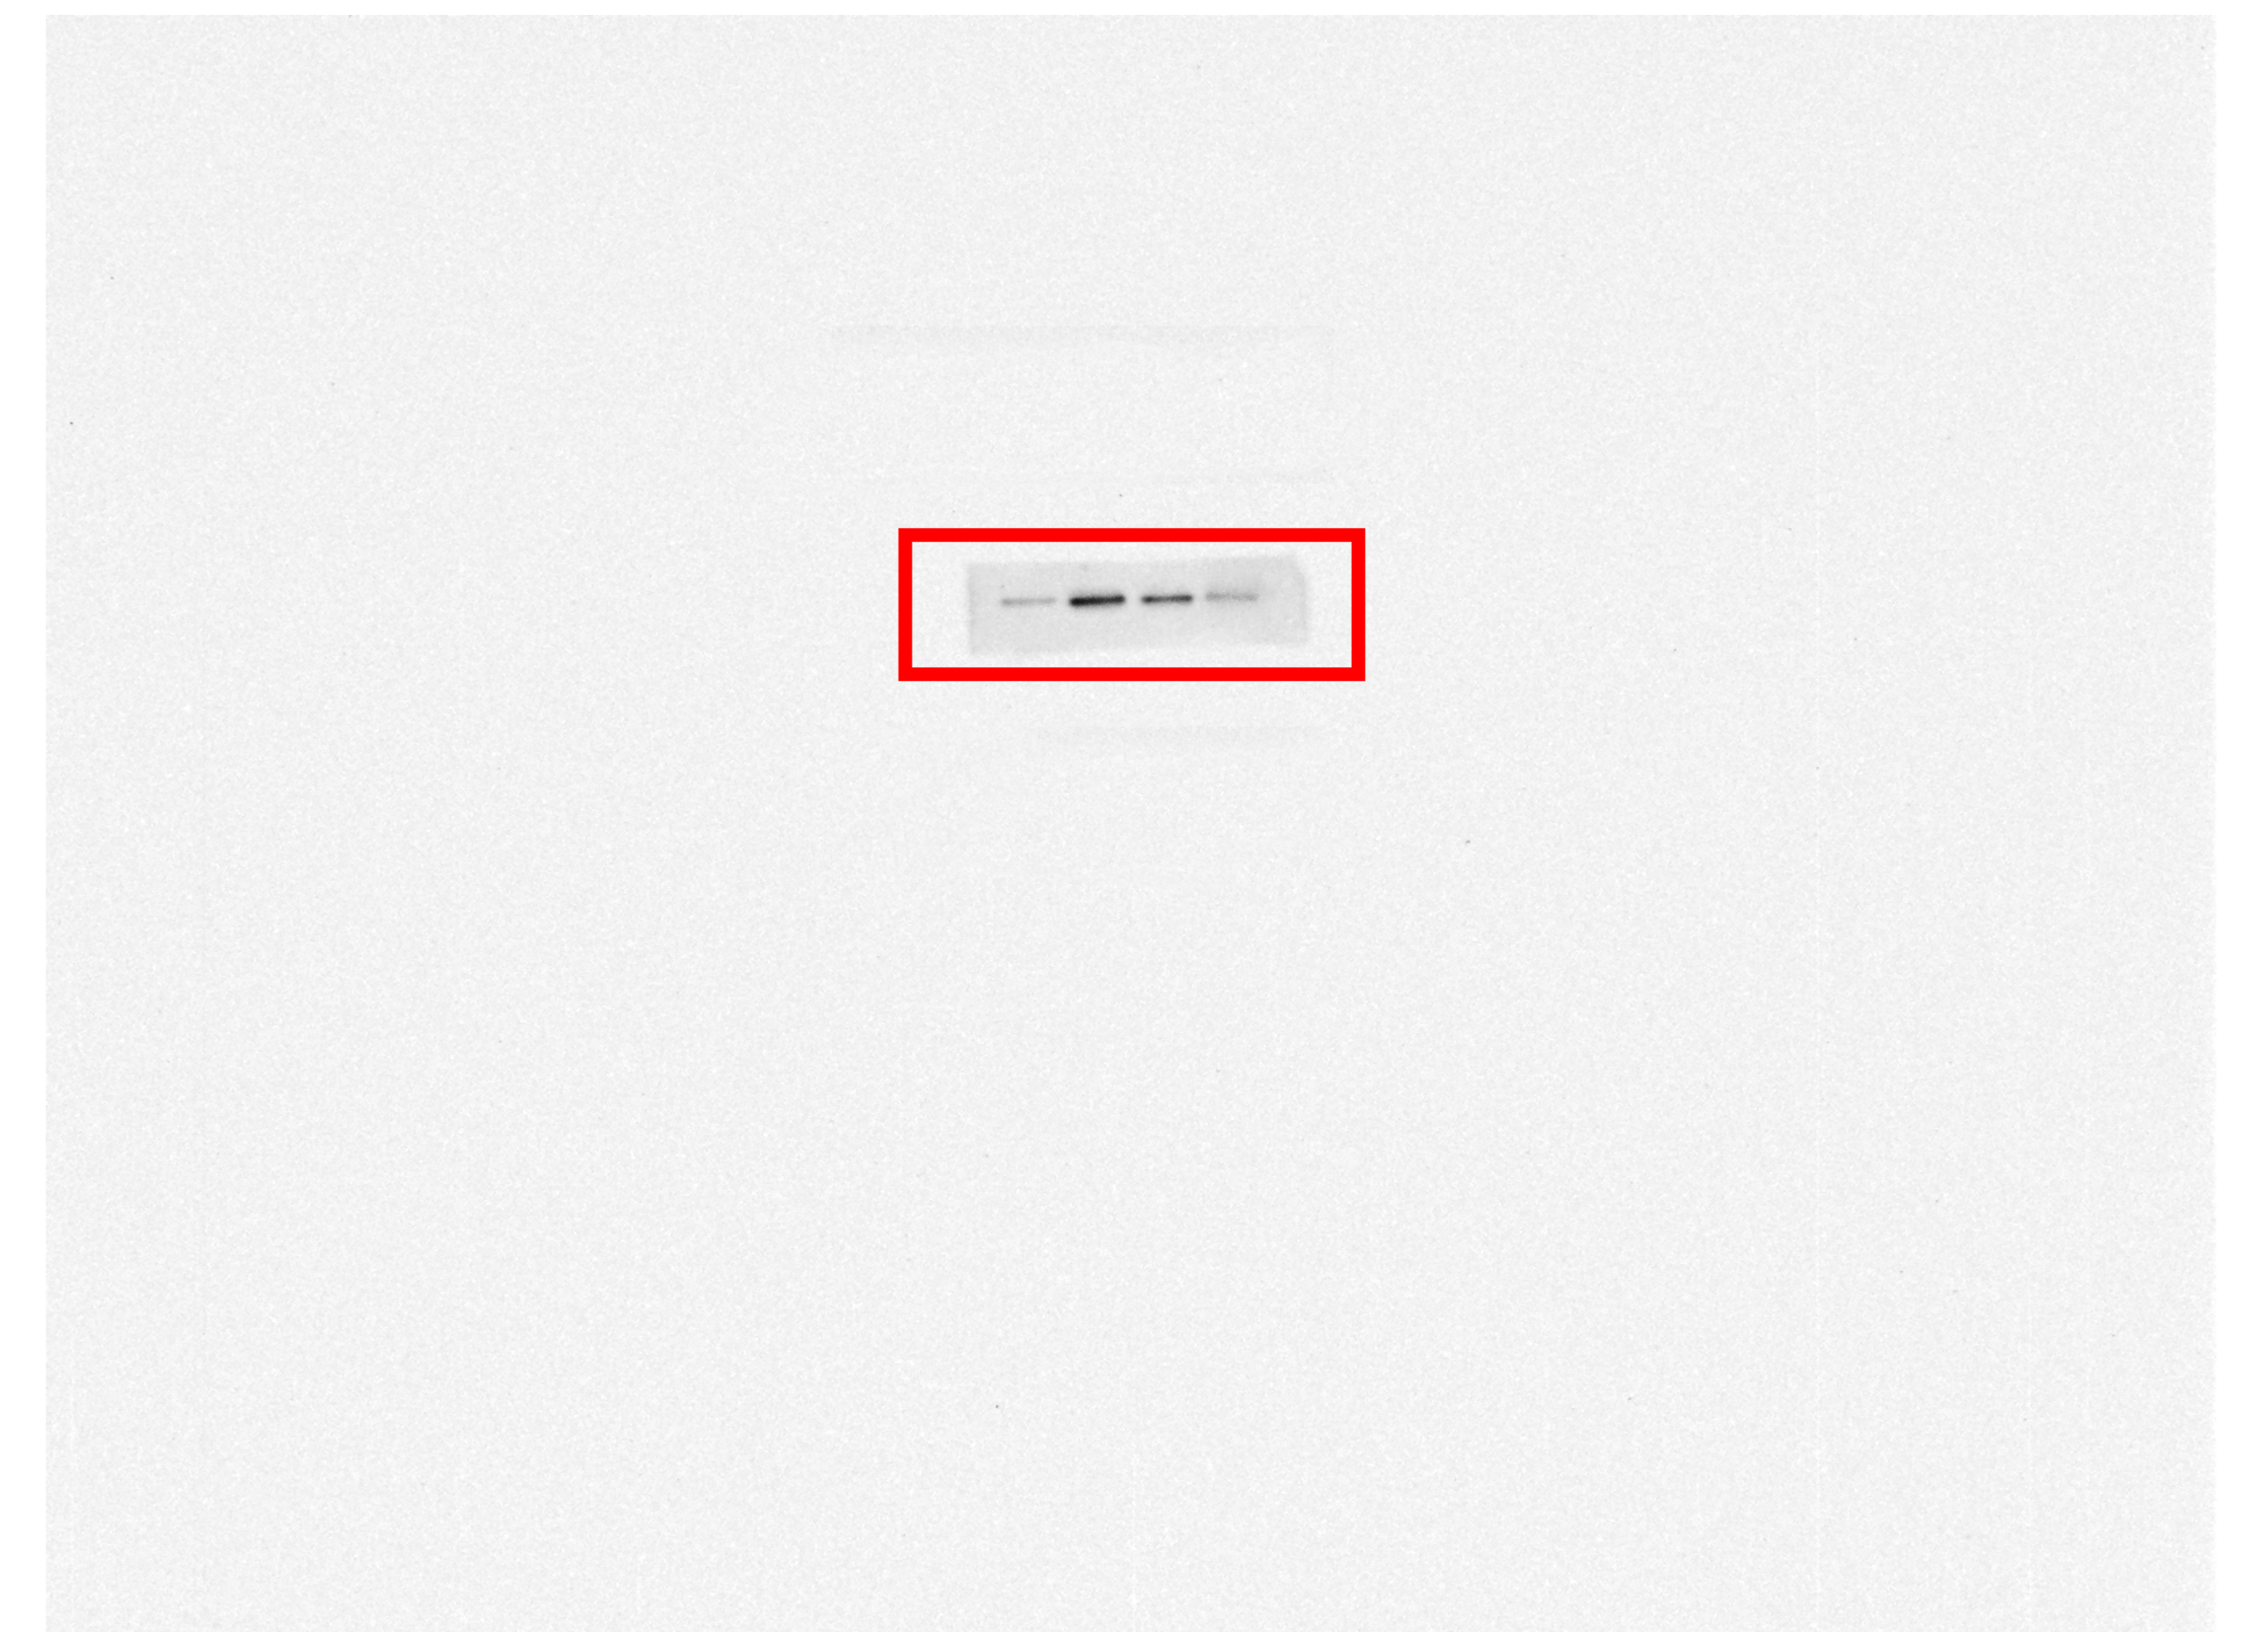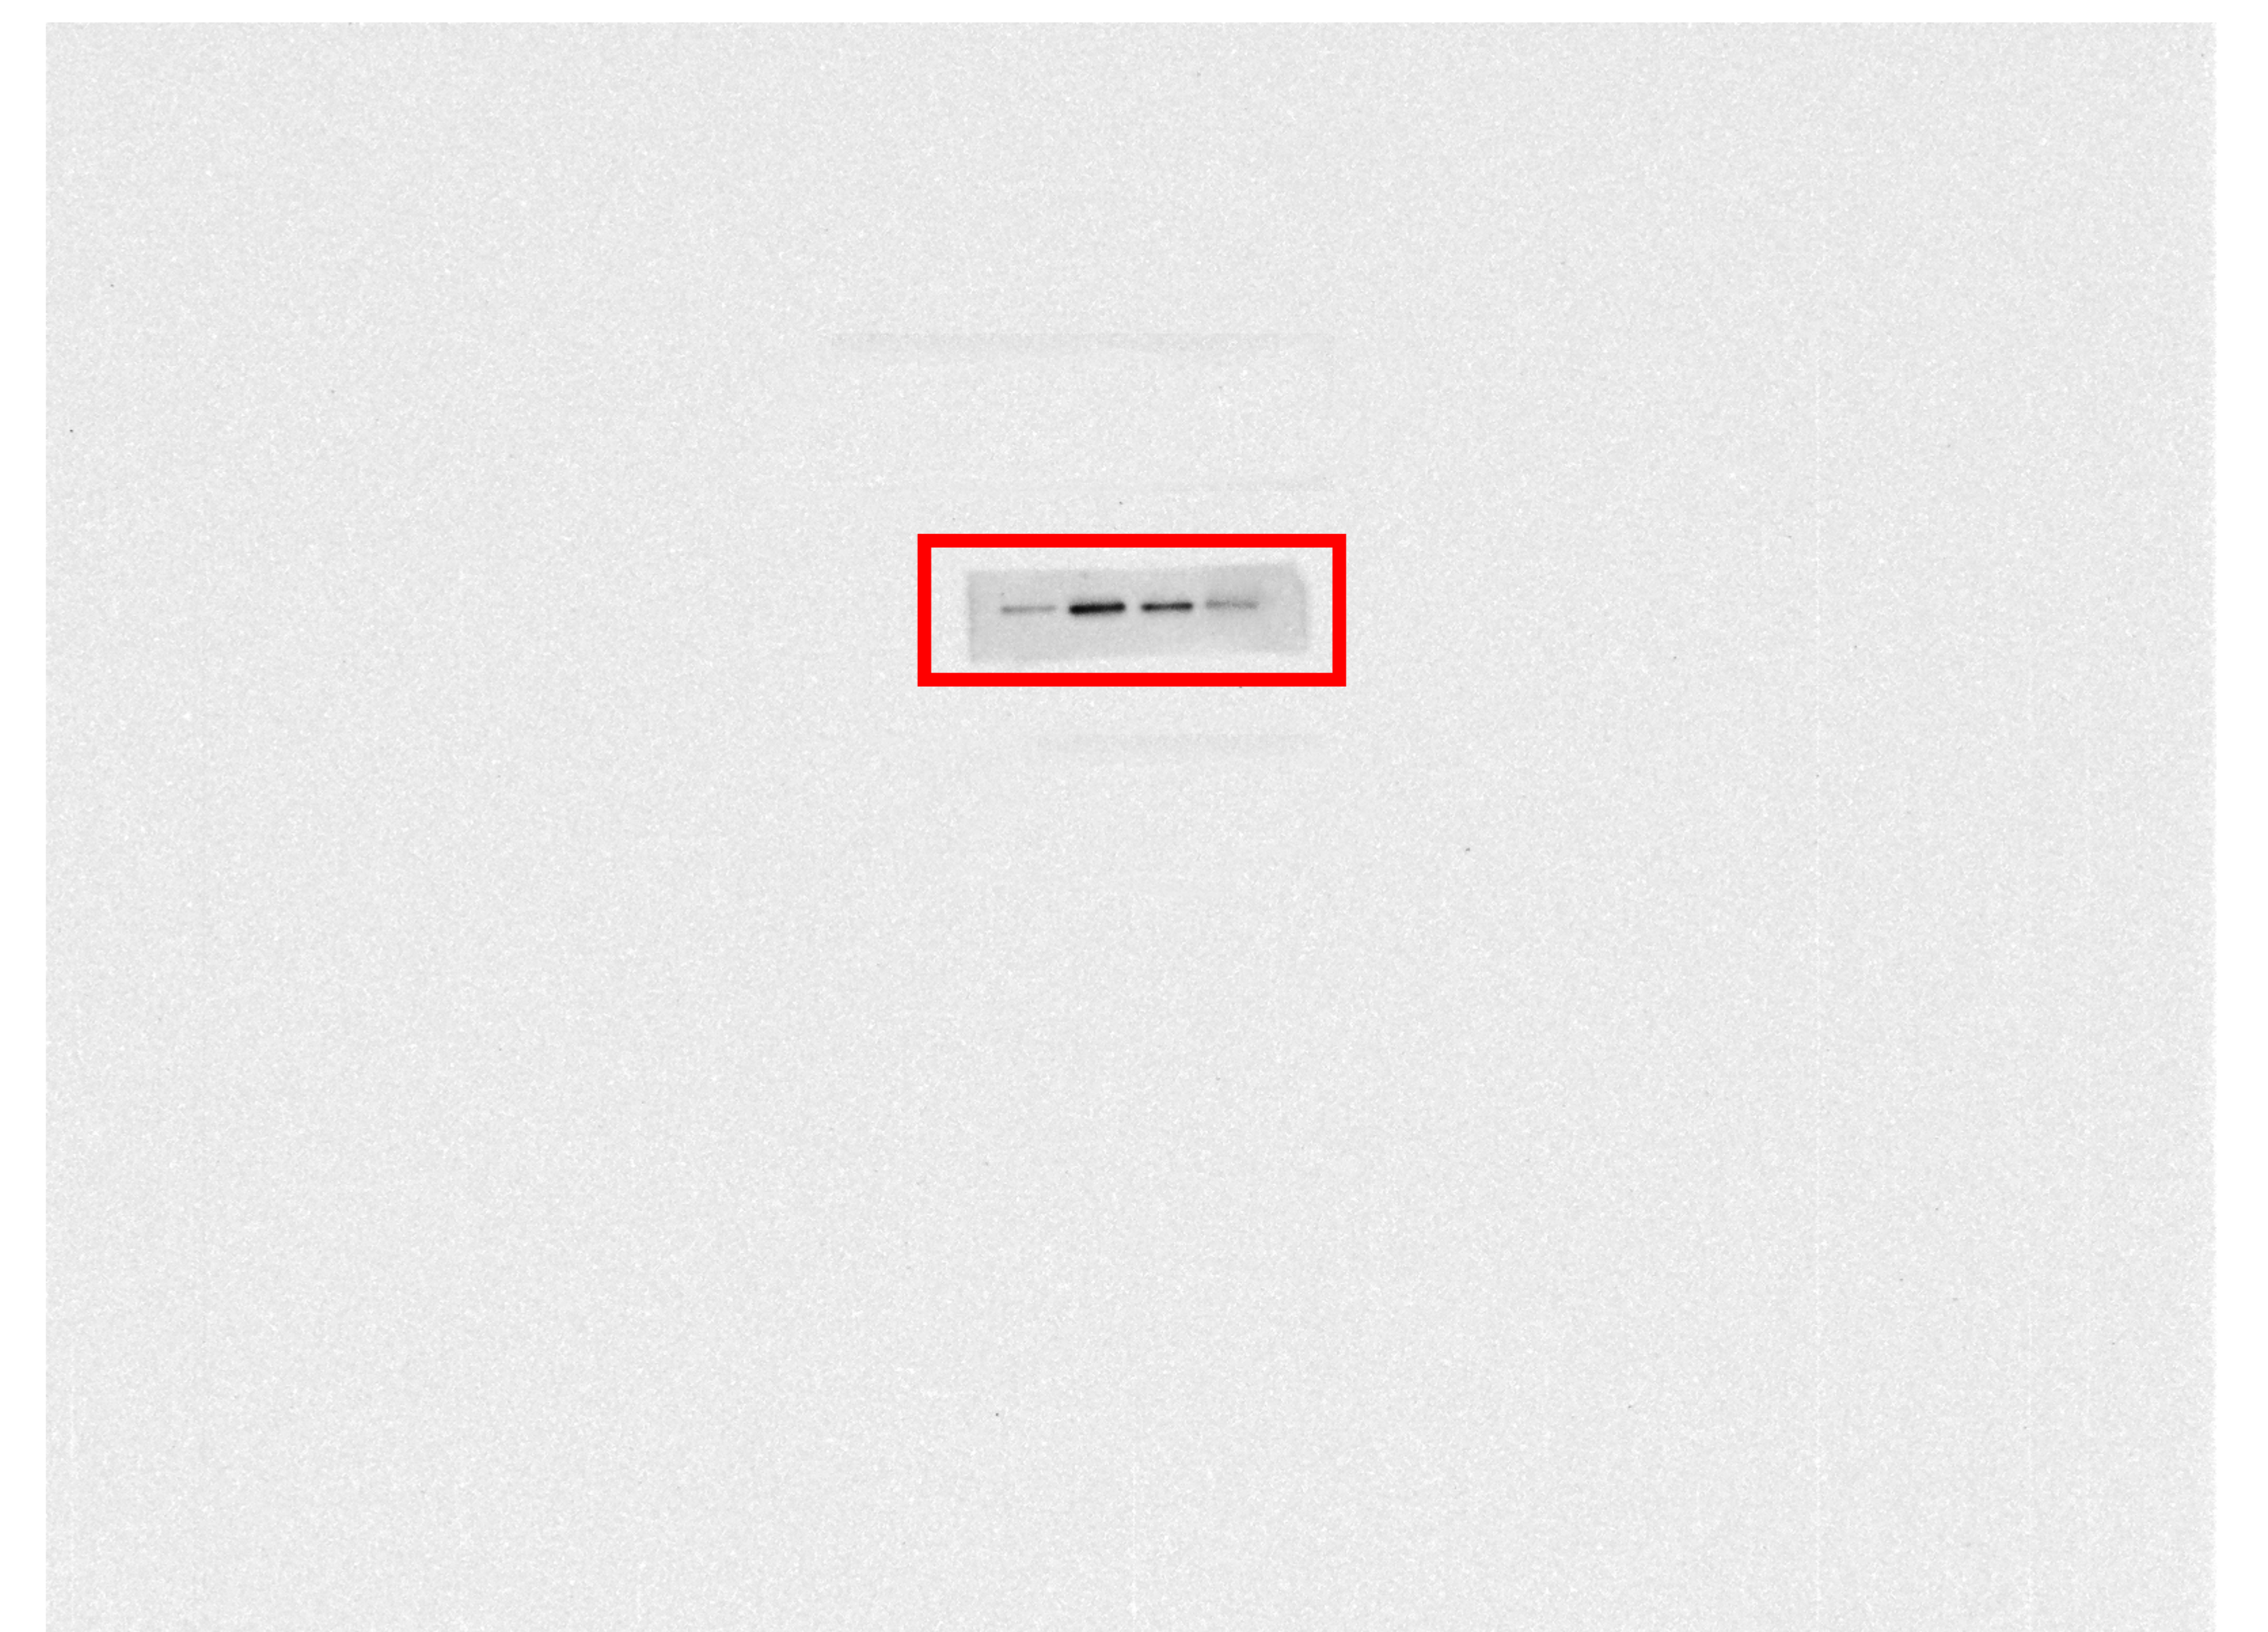

B

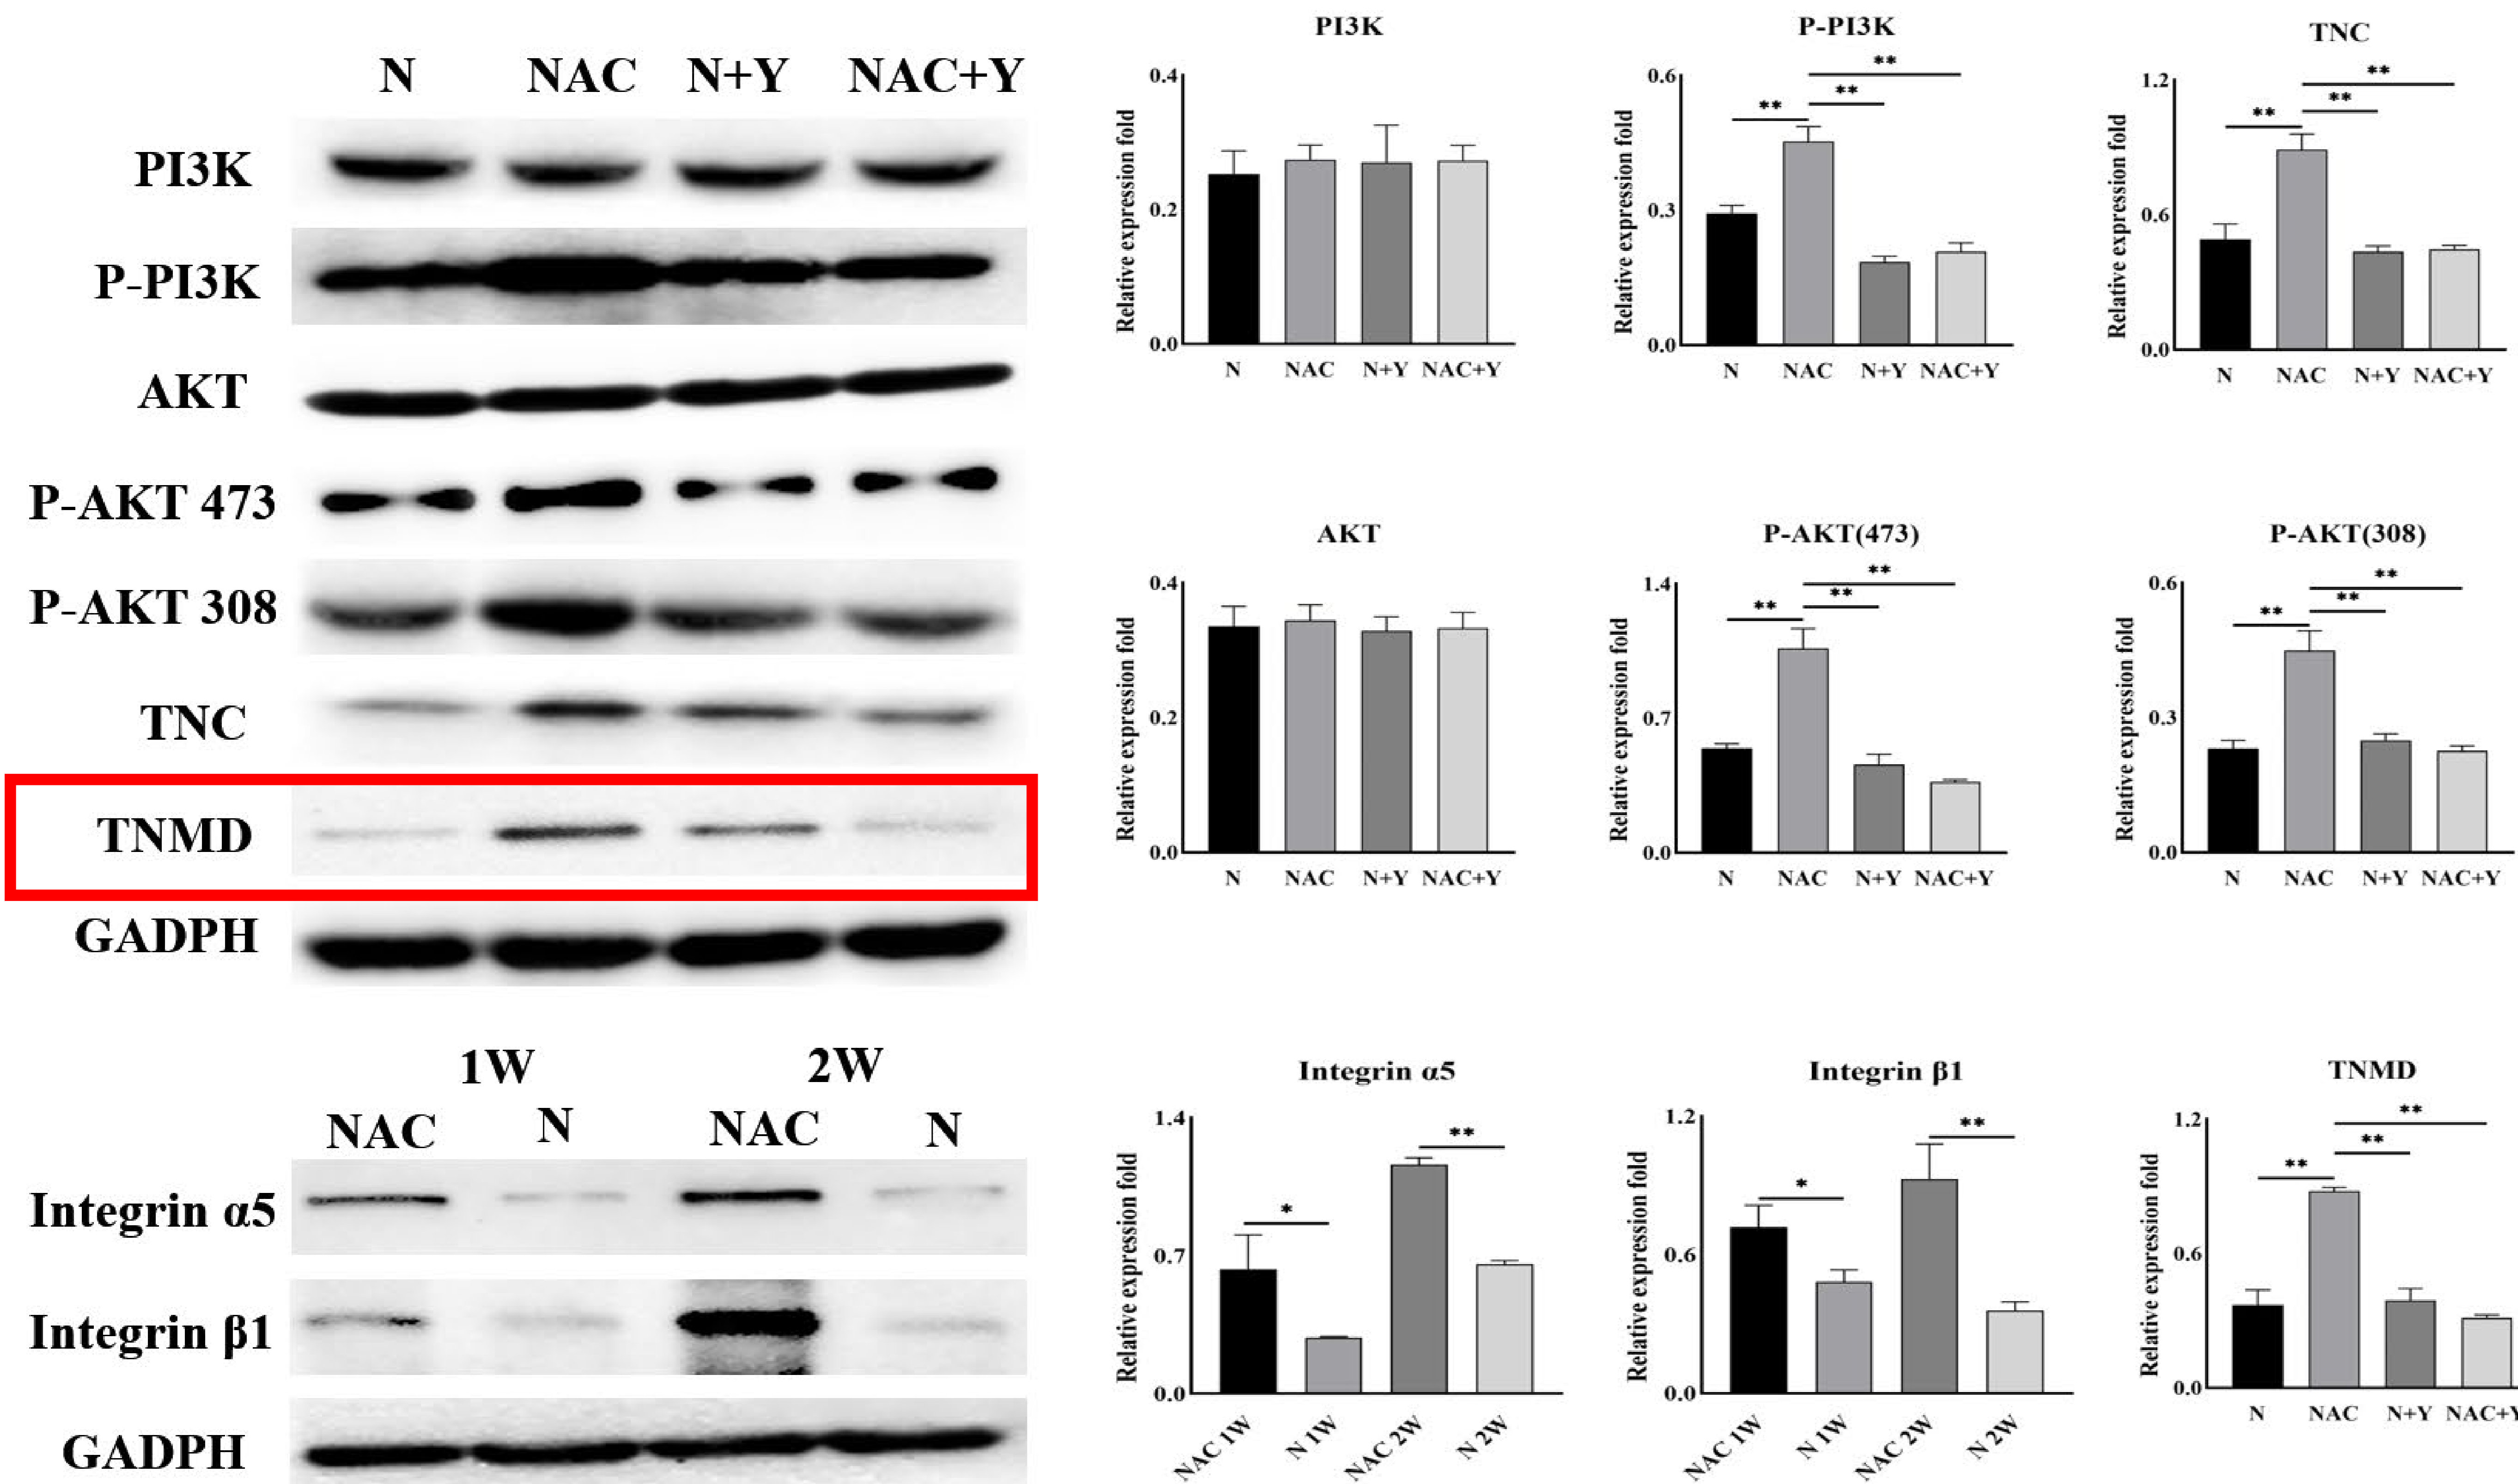

# Fig4B PI3K-AKT-GADPH

Three times repeated exposure image

Fig 4

A

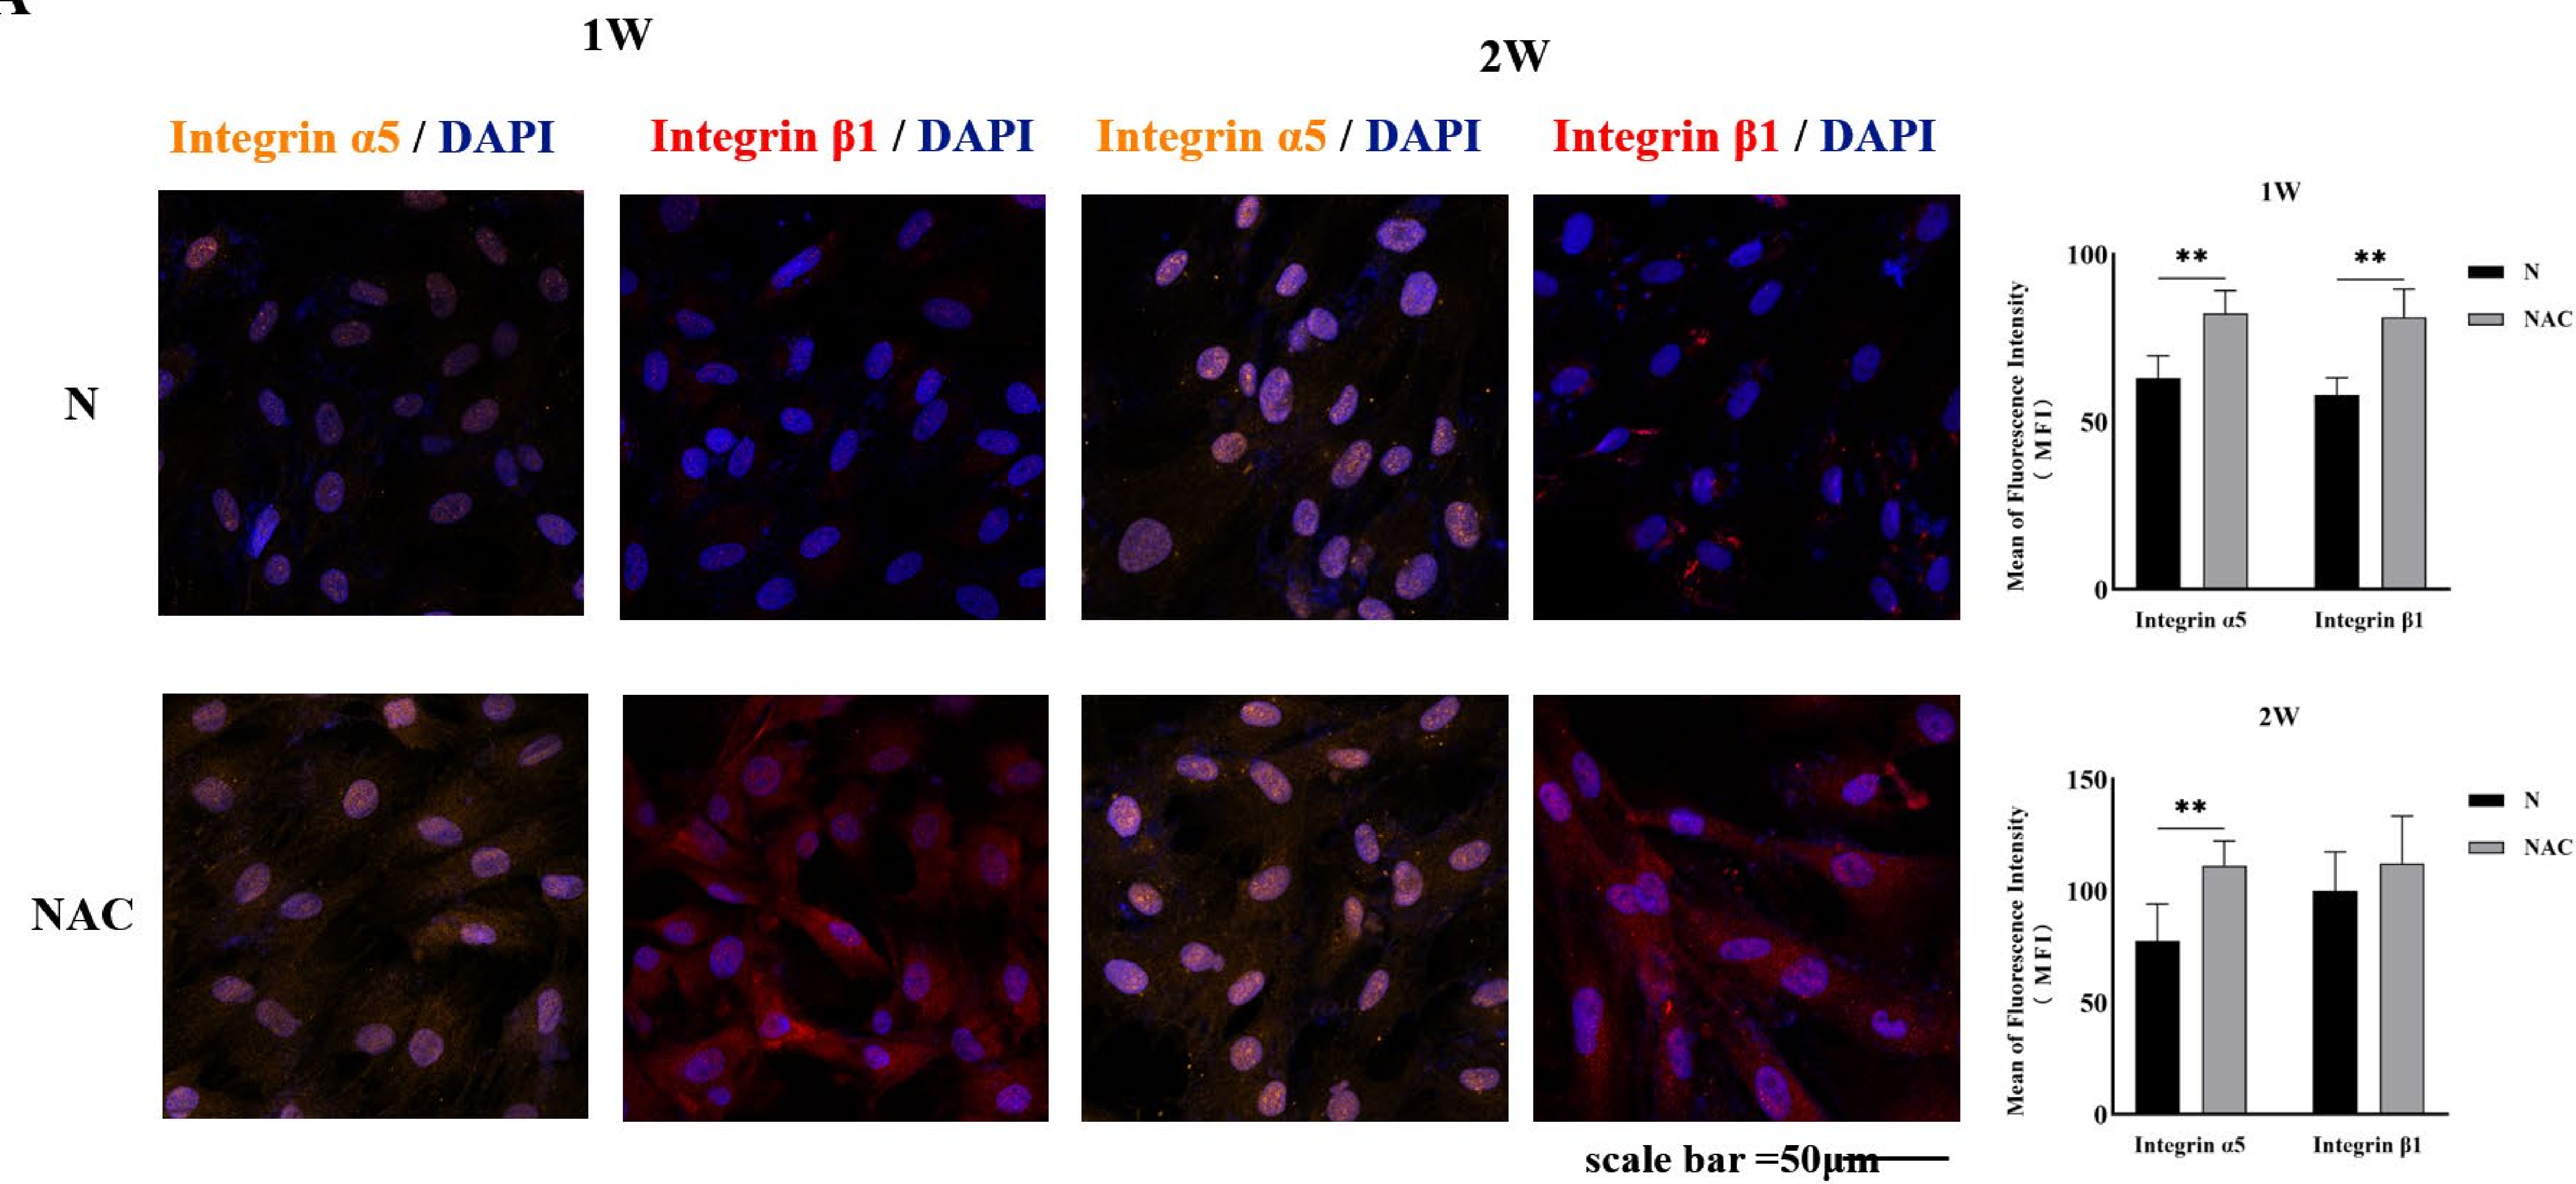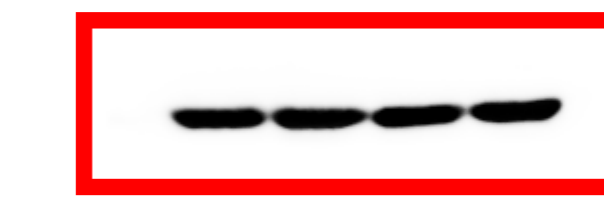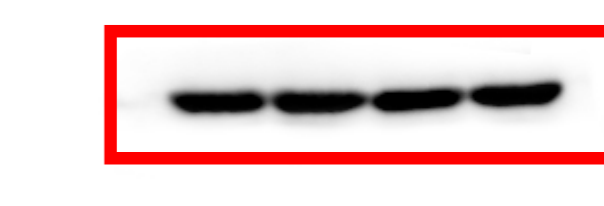

B

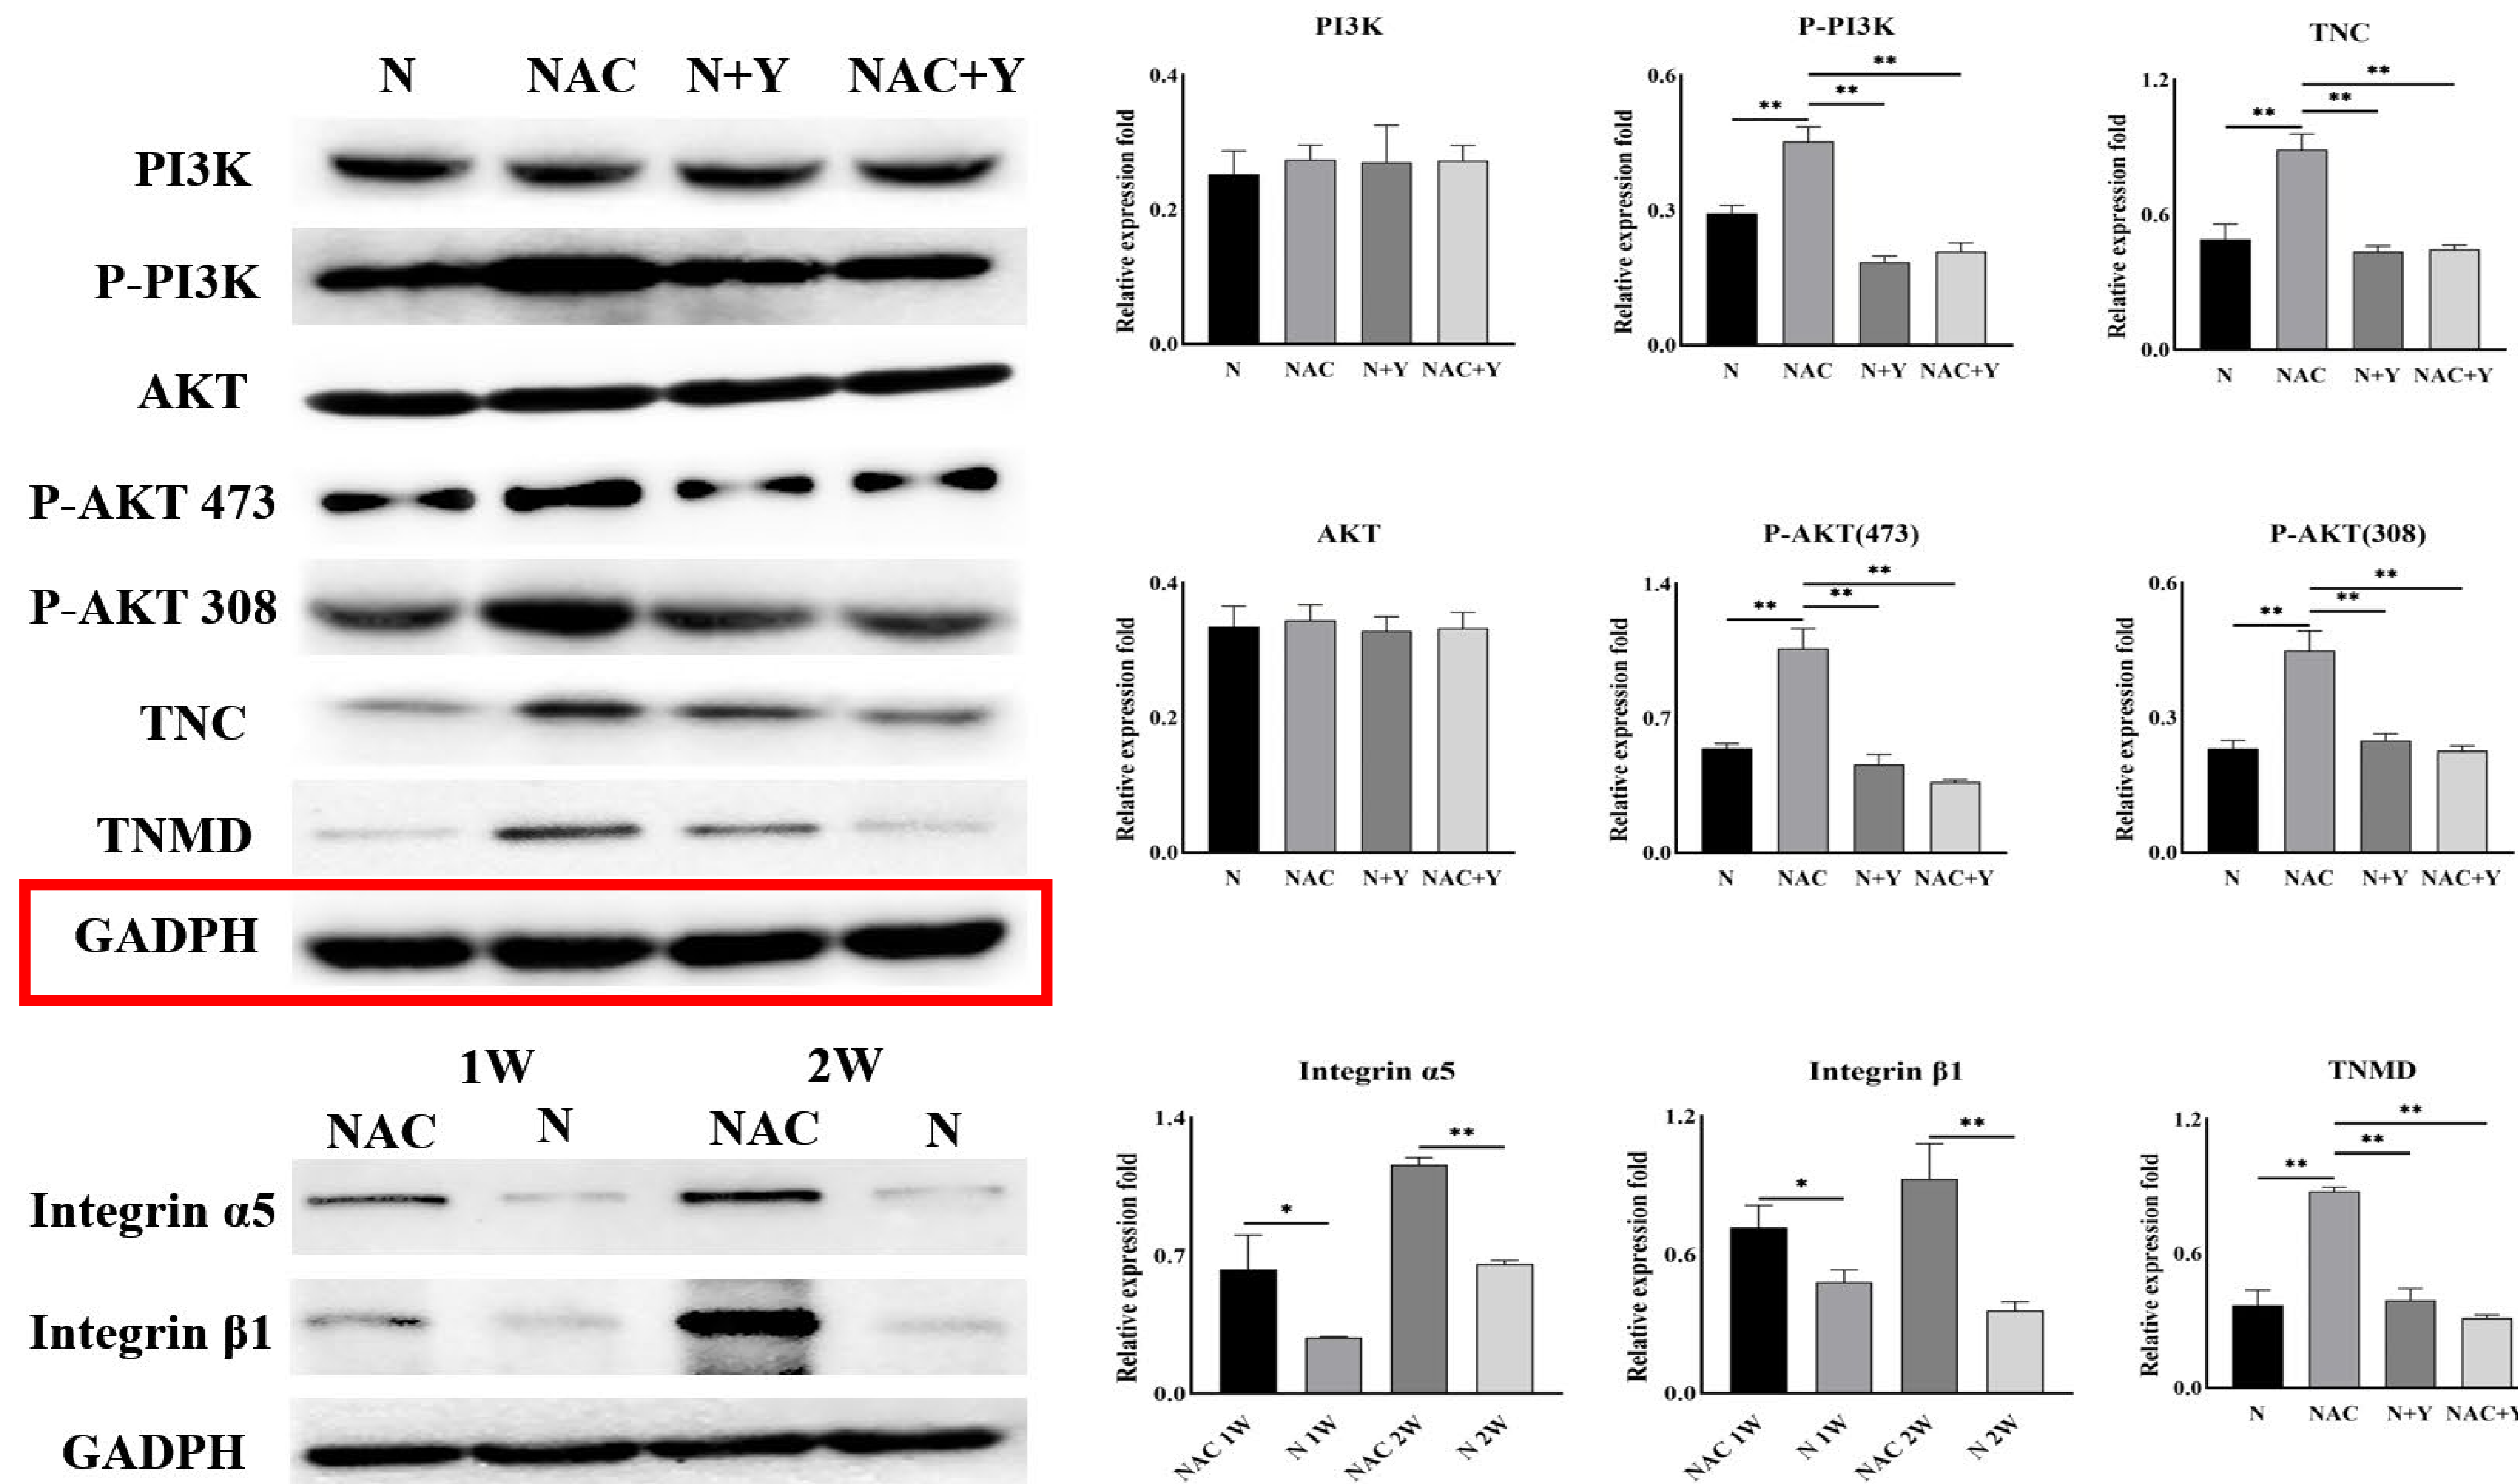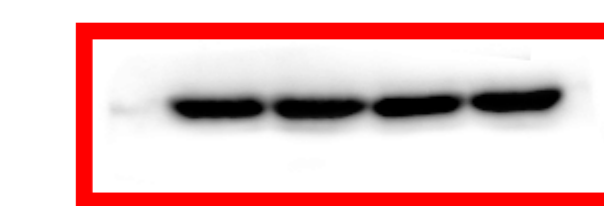



# Fig4B Integrin $\alpha 5$

Three times repeated exposure image

Fig 4

A

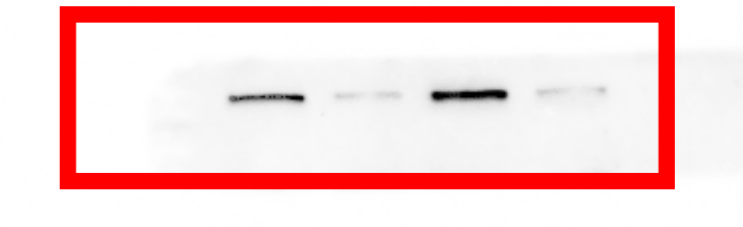

B

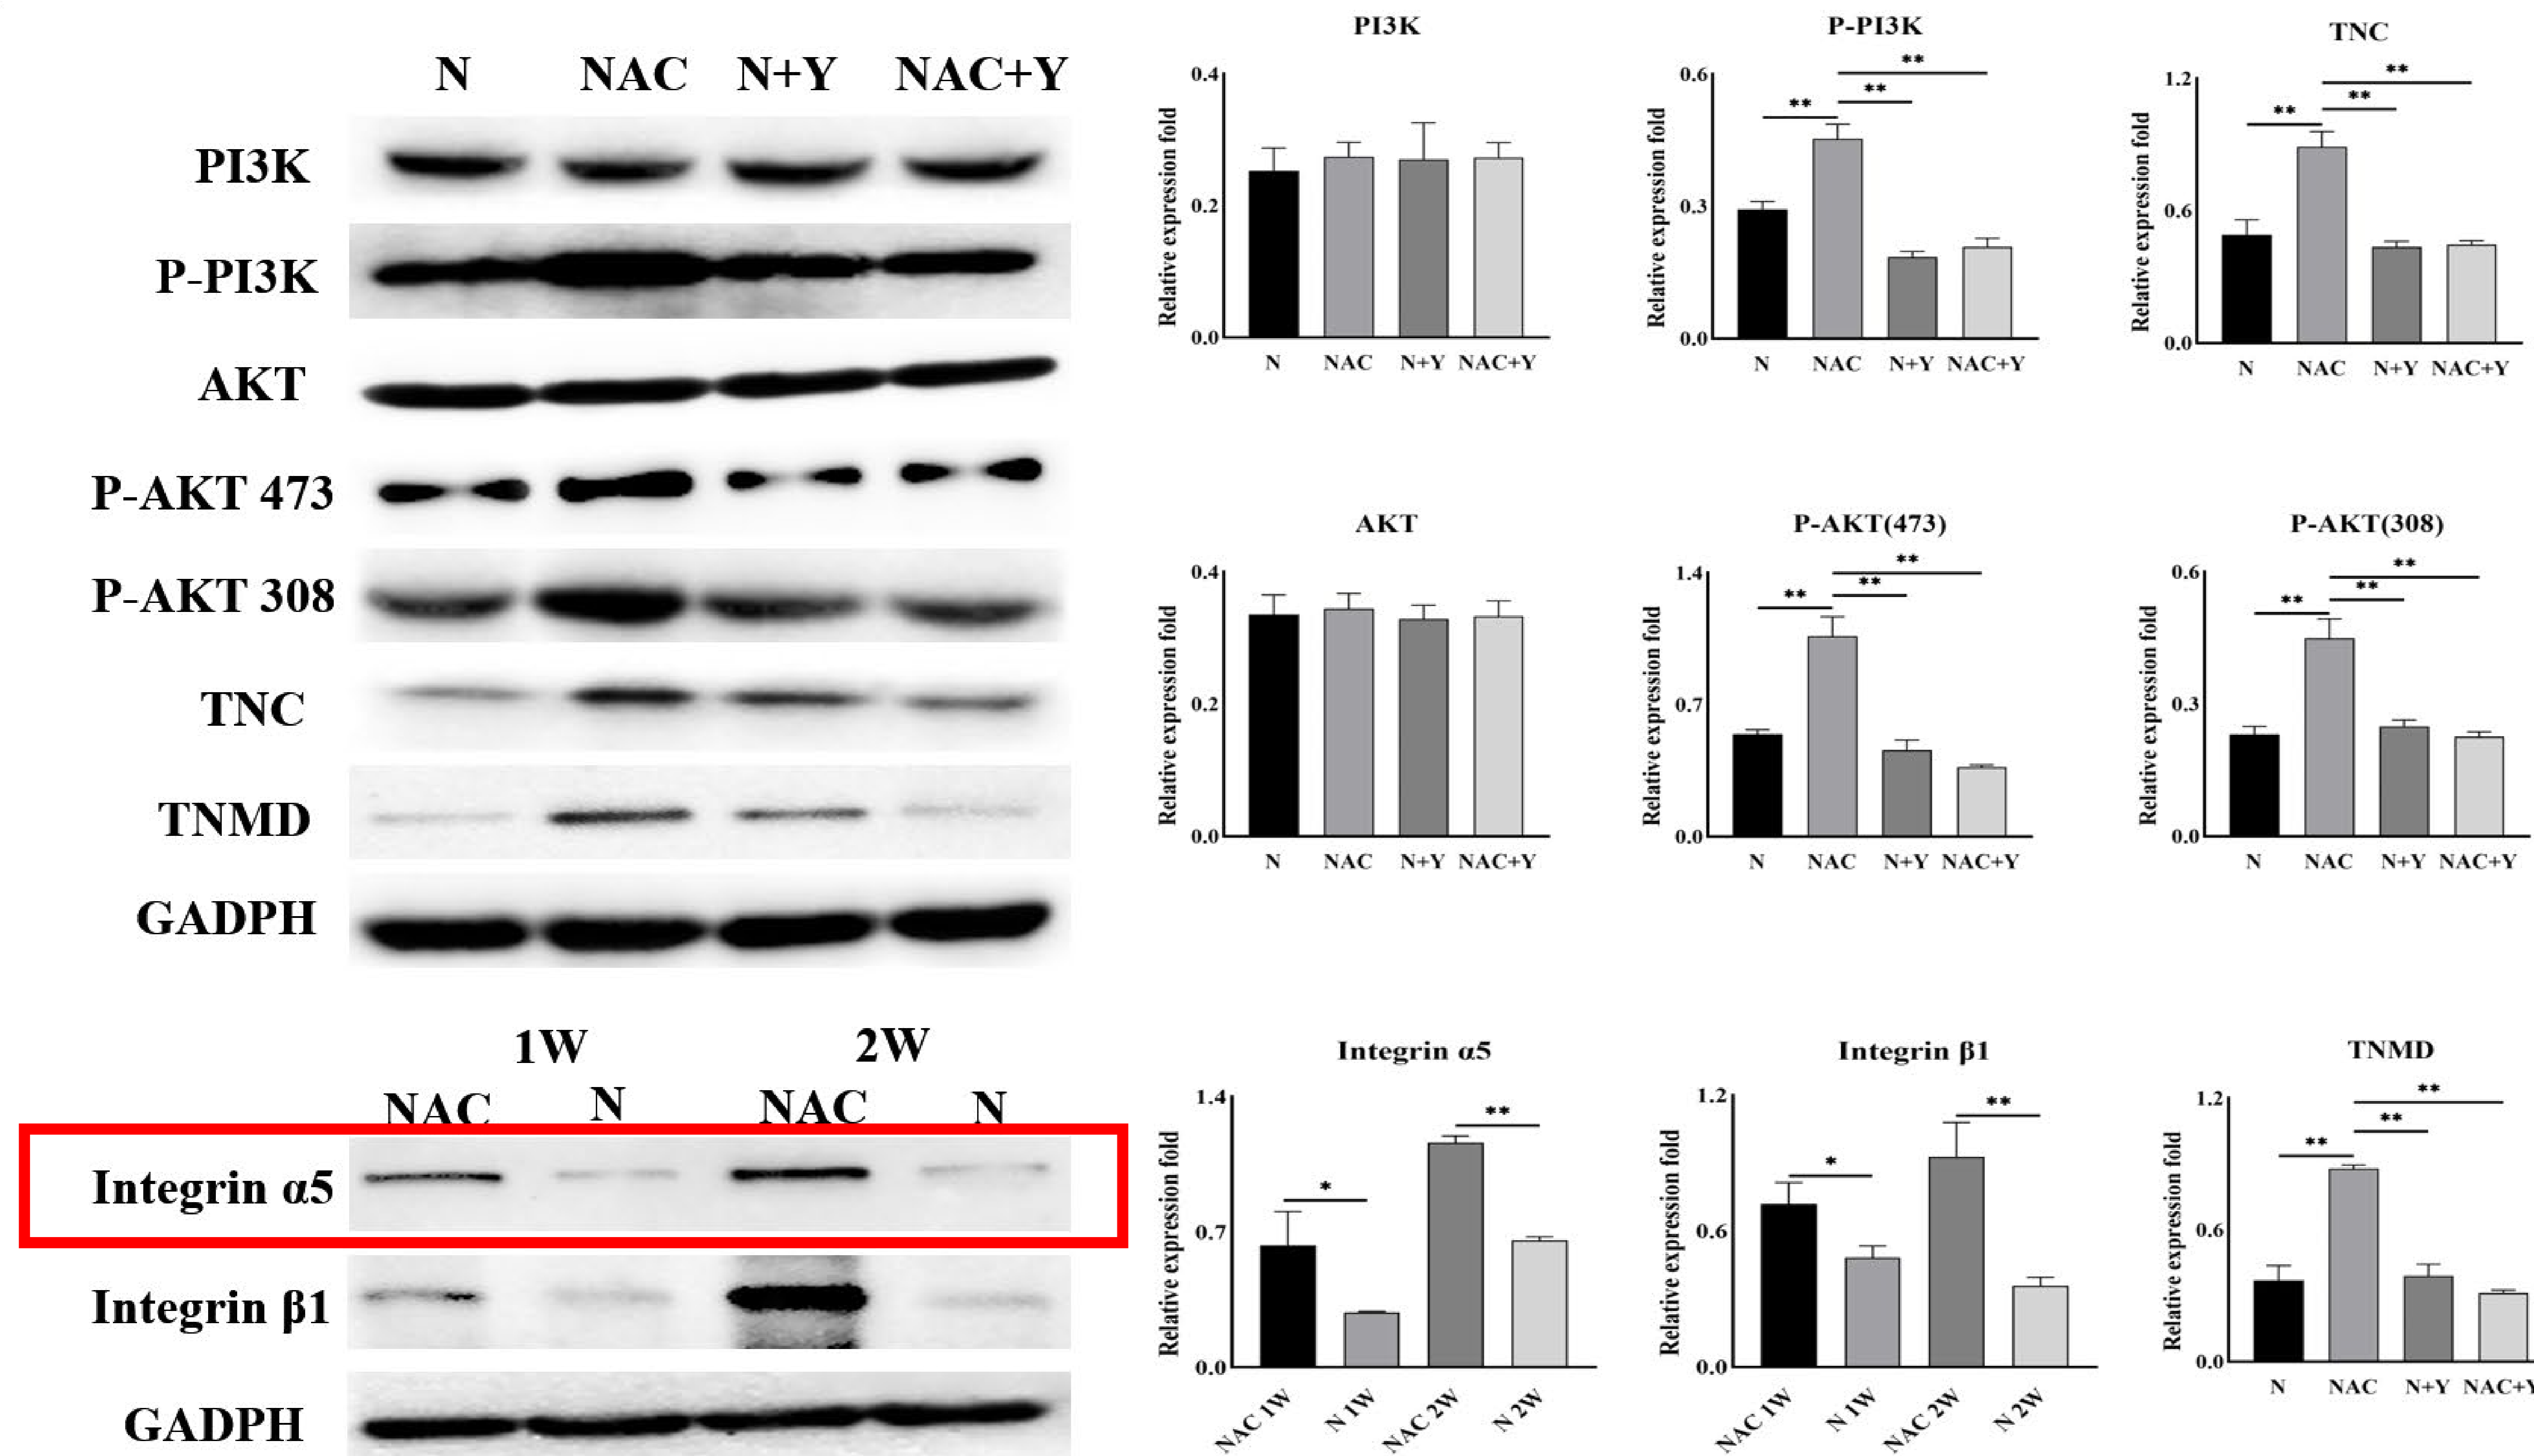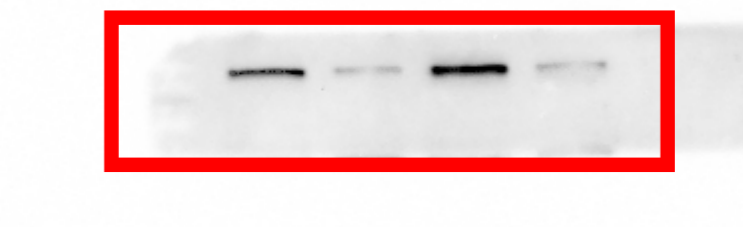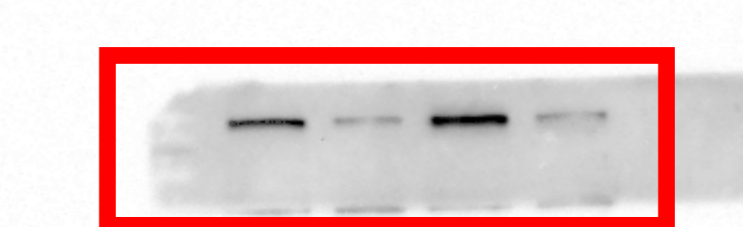

# Fig4B Integrin $\beta$ 1

Three times repeated exposure image

Fig 4

A

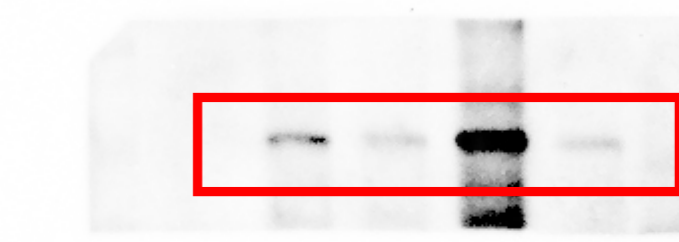

B

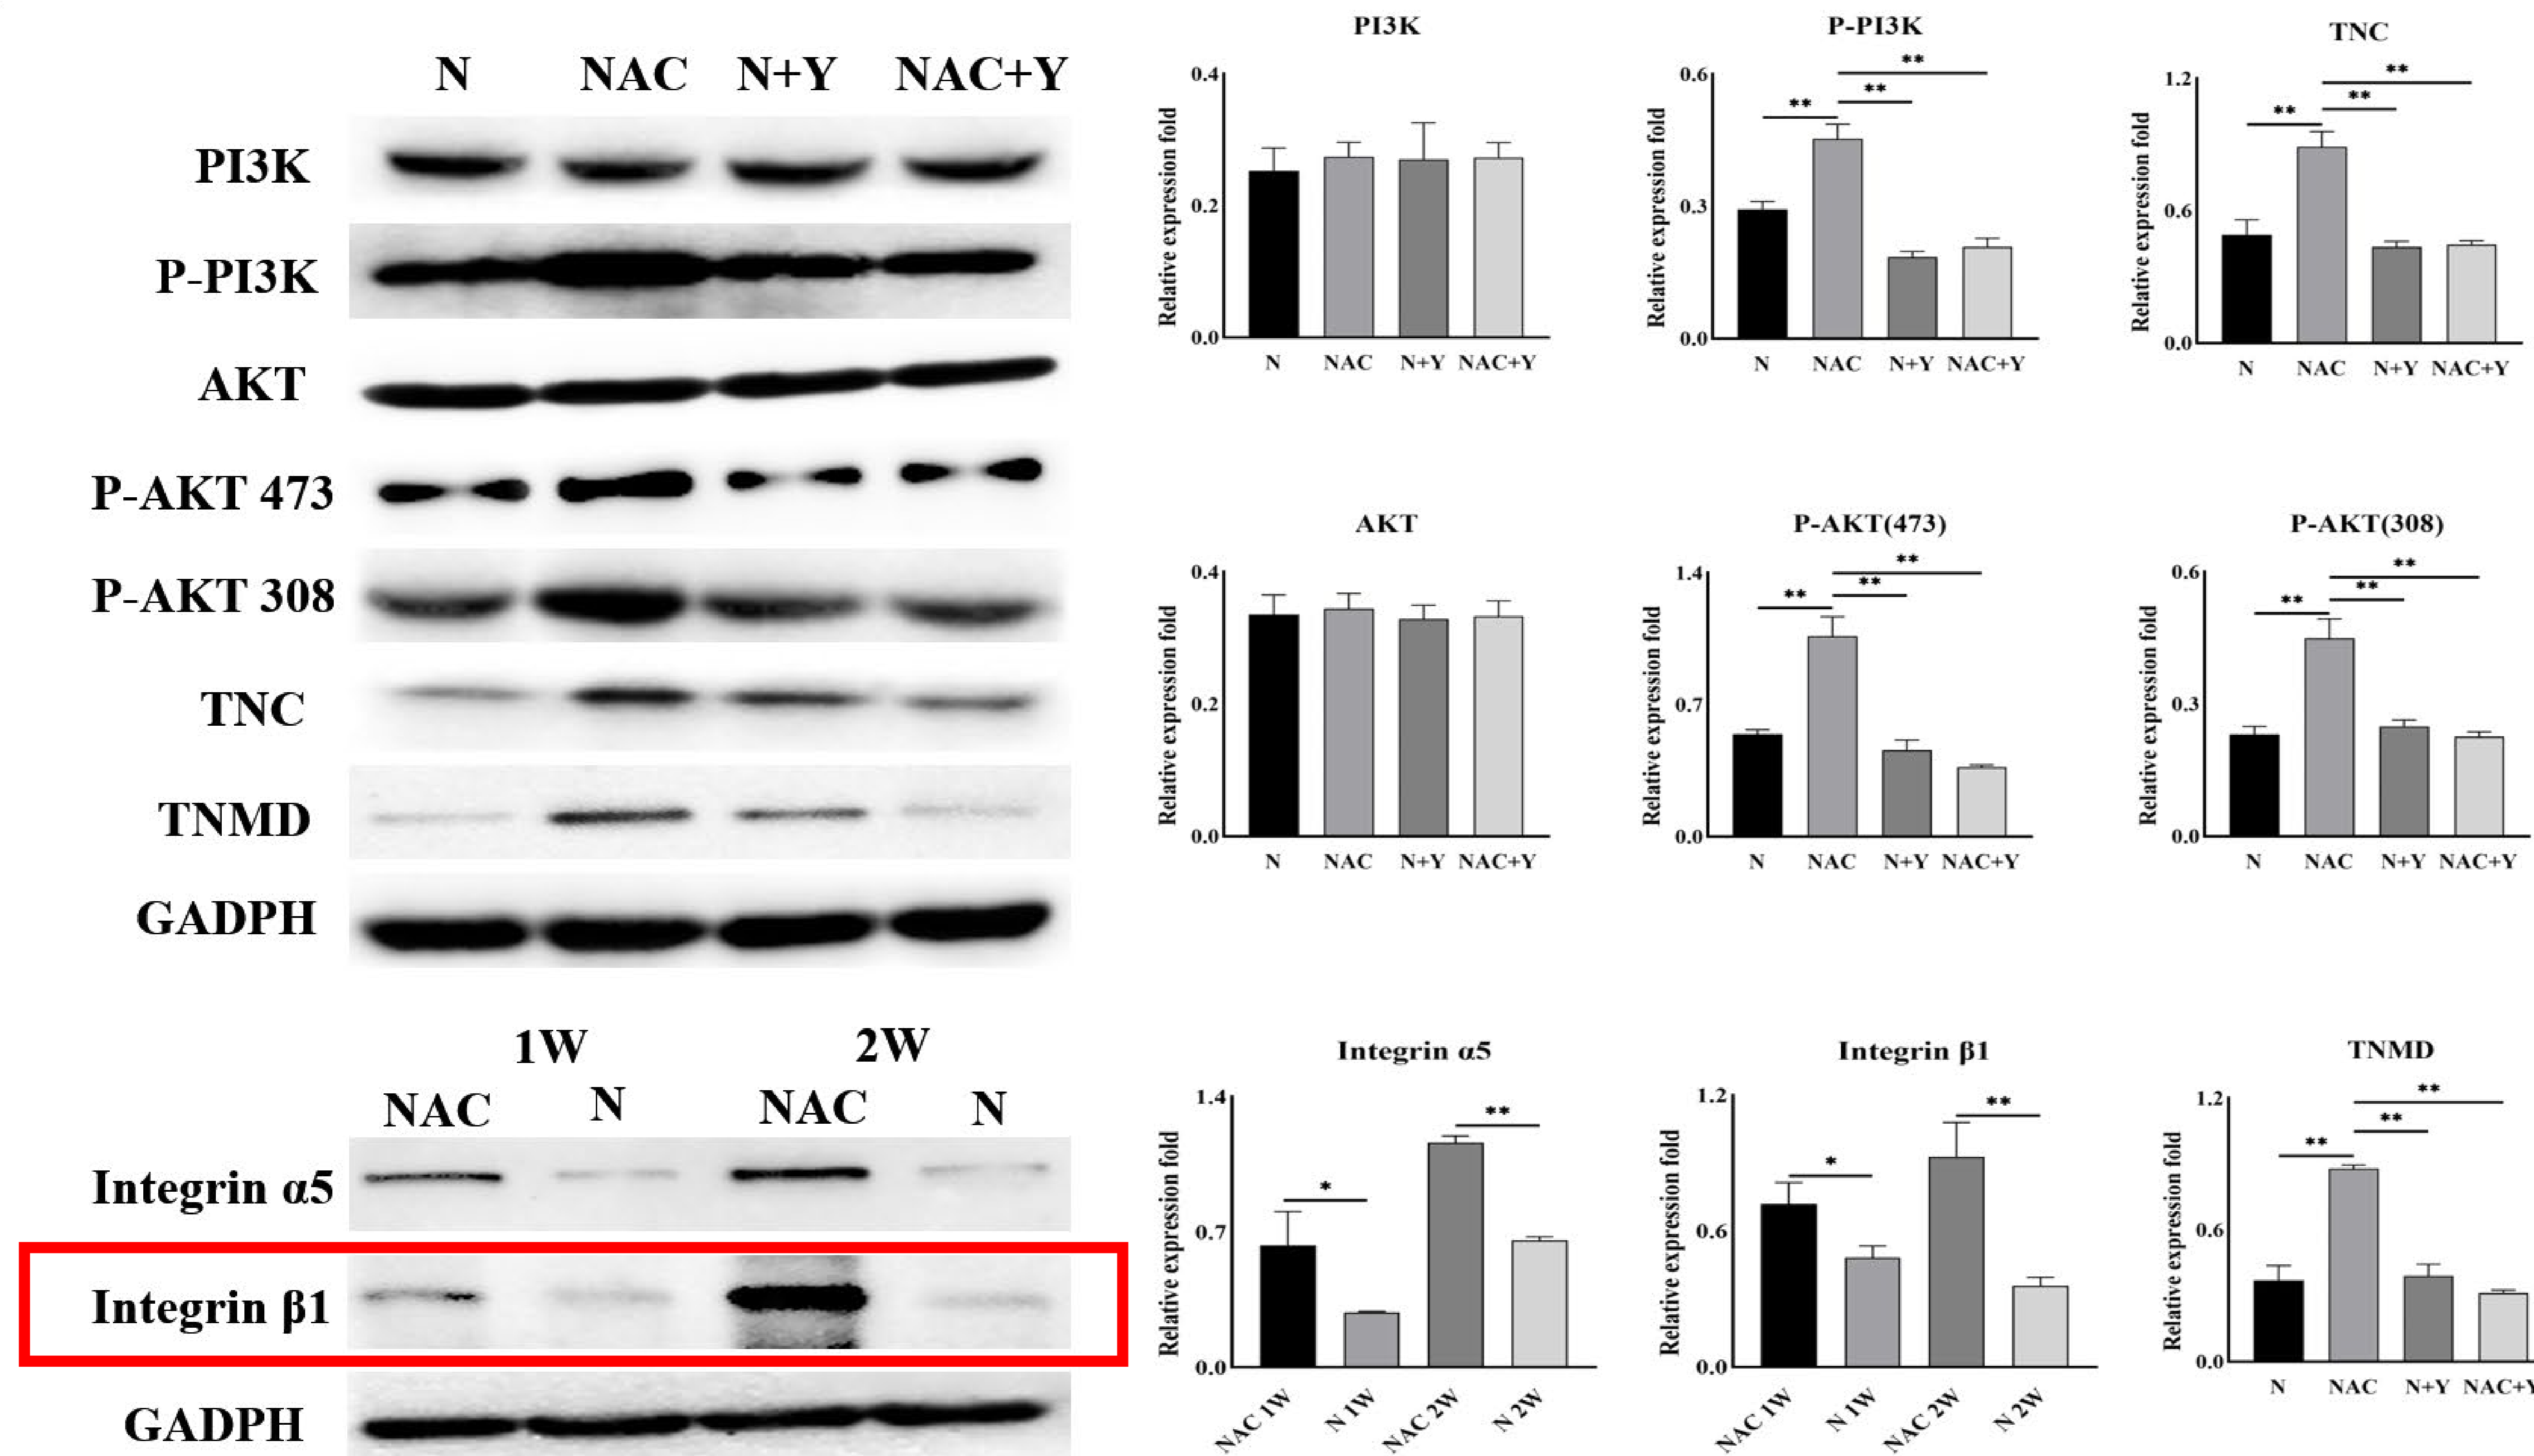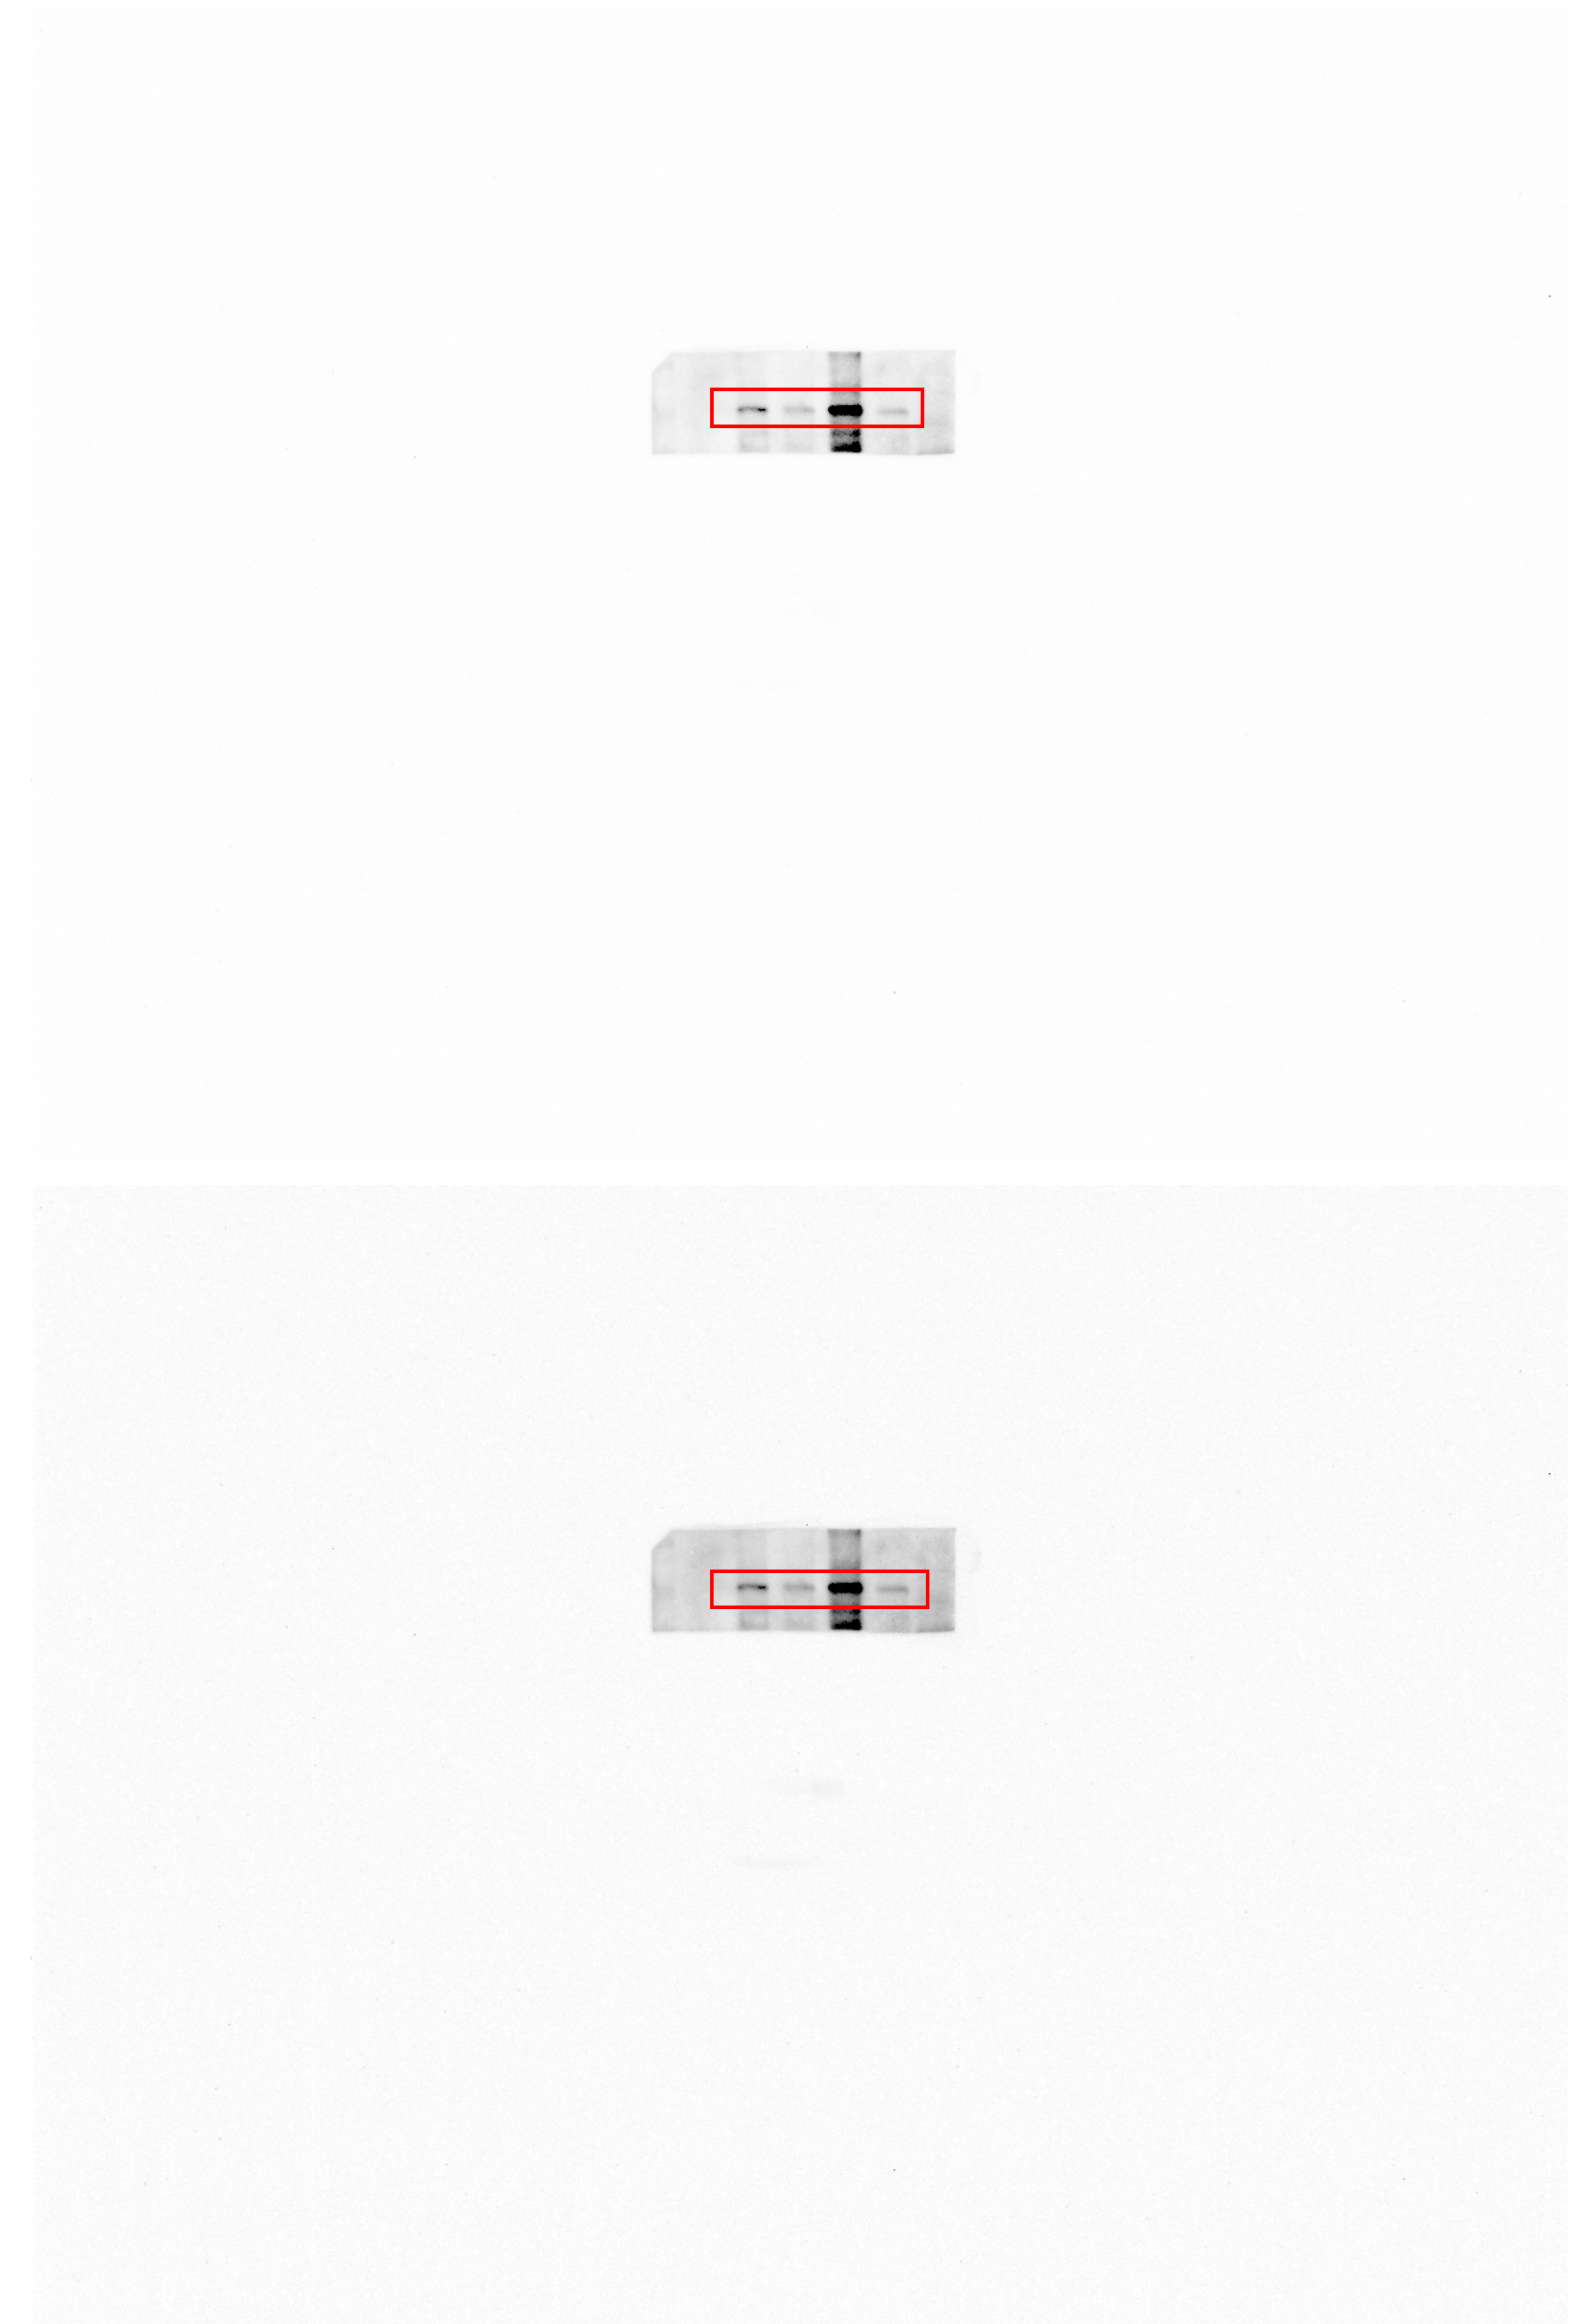

# Fig4B Integrin-GADPH

Three times repeated exposure image

Fig 4

A

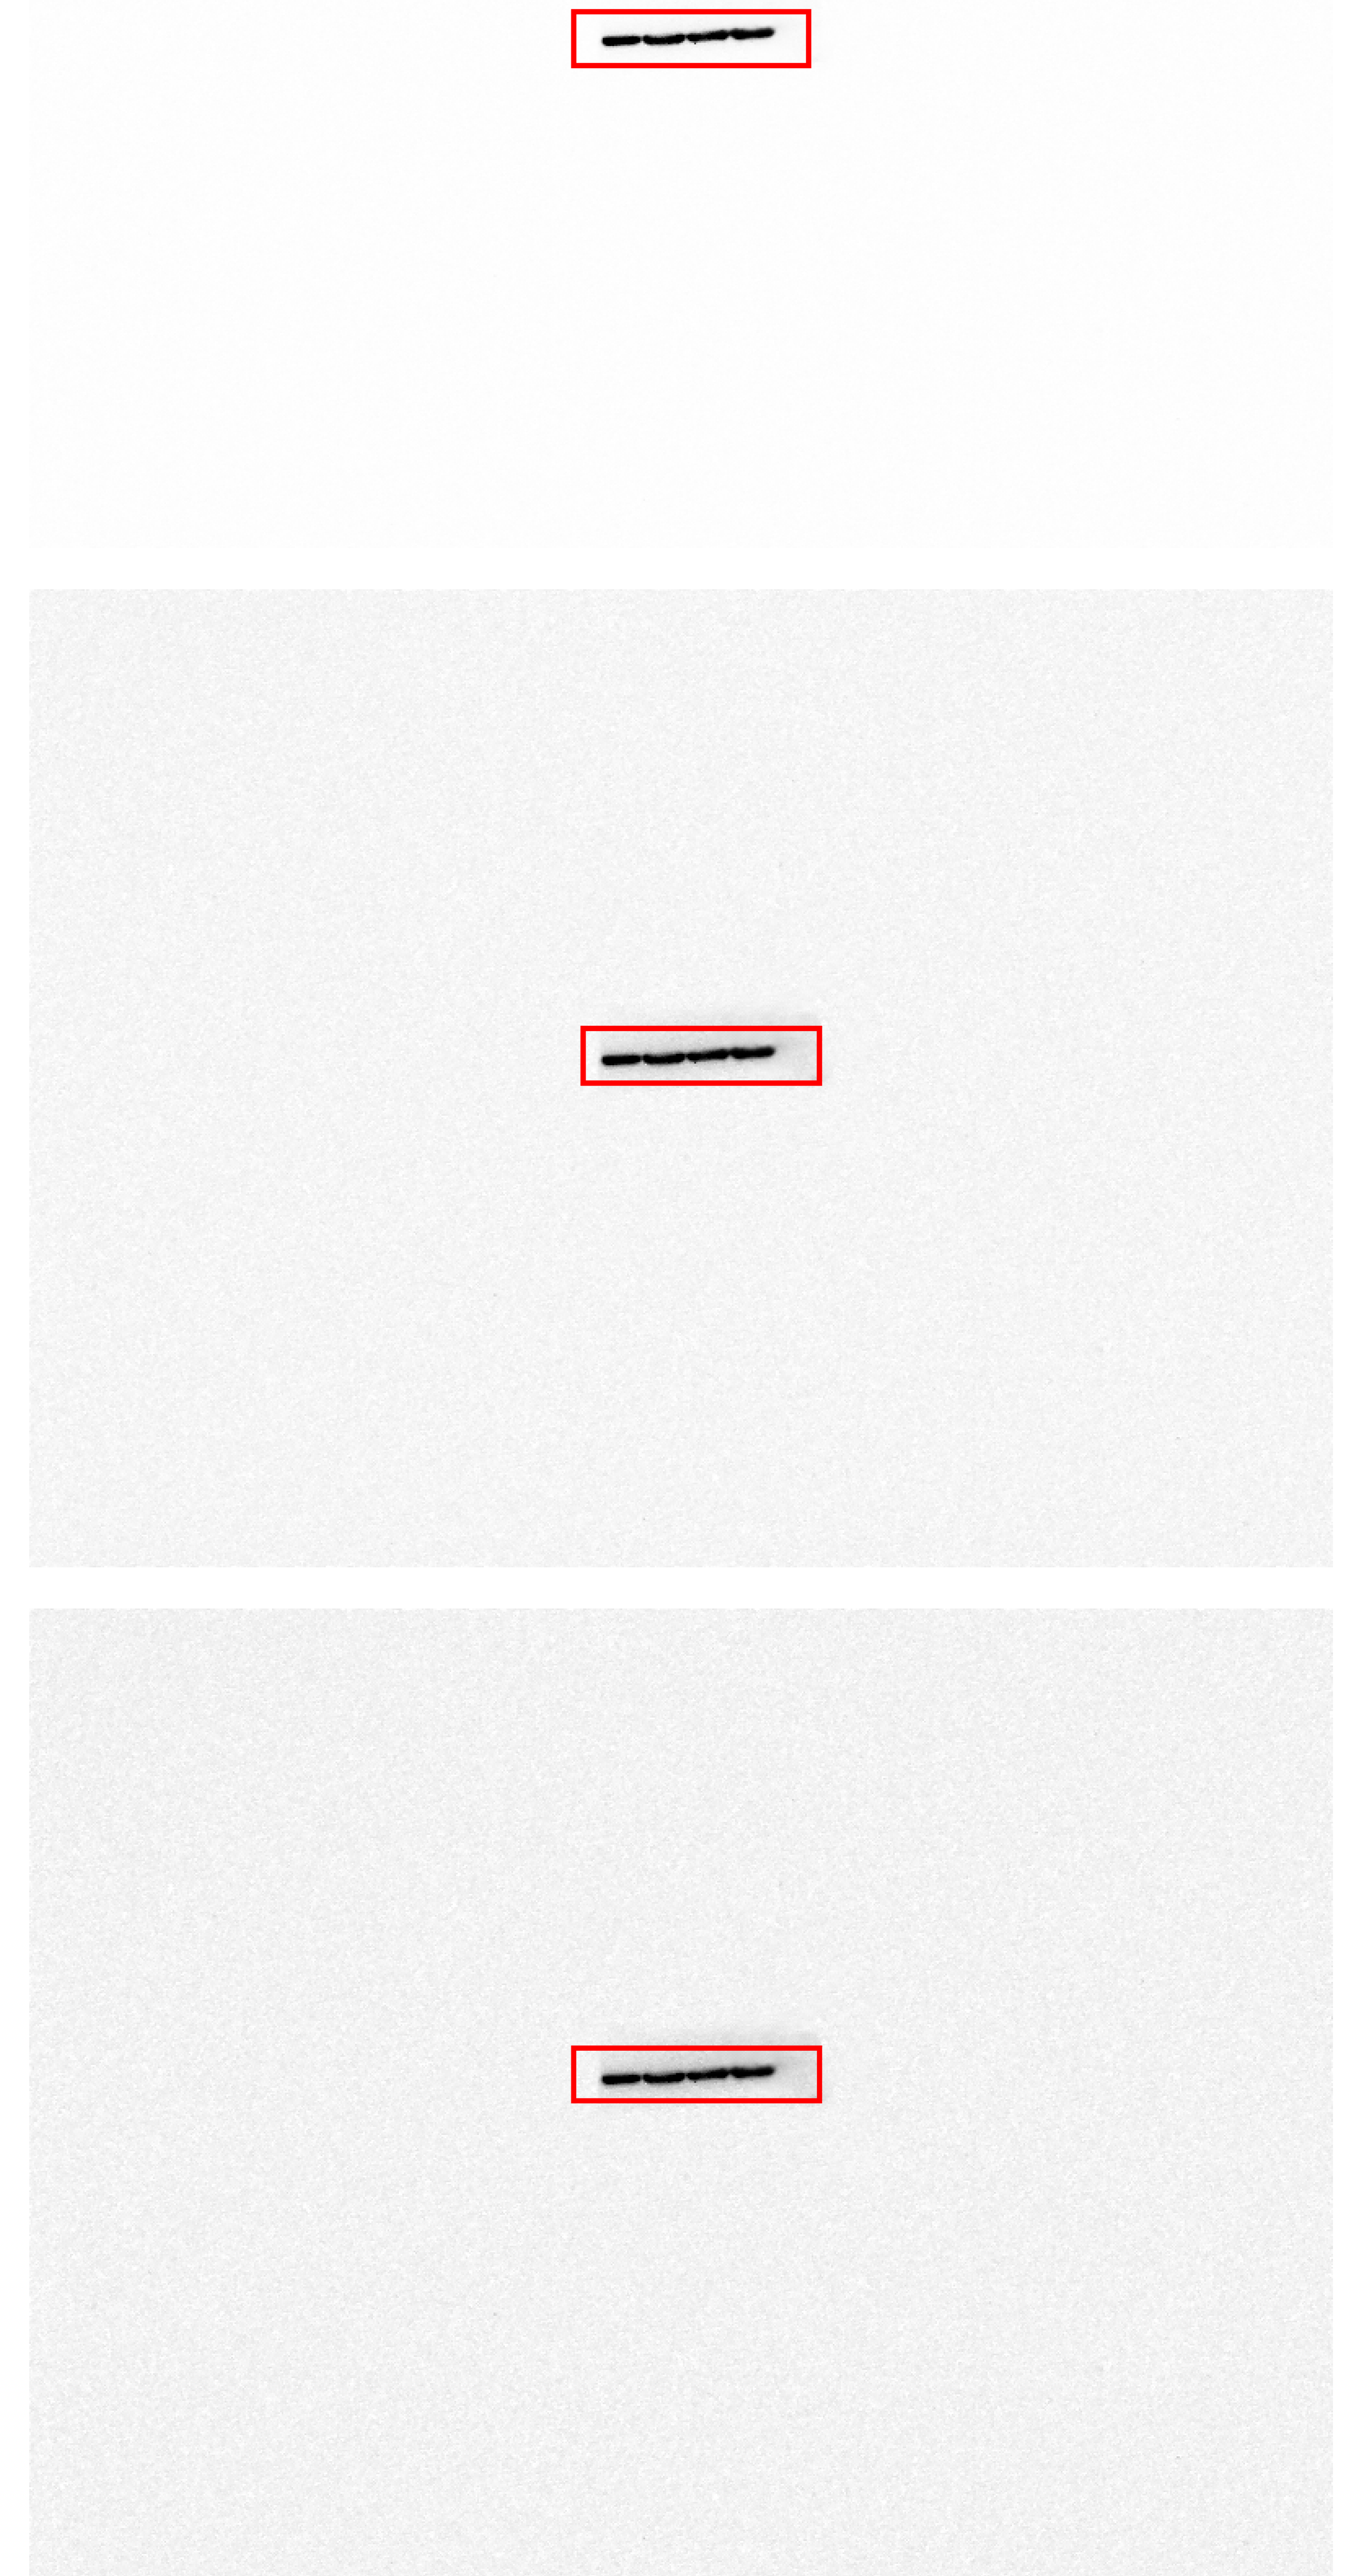

B

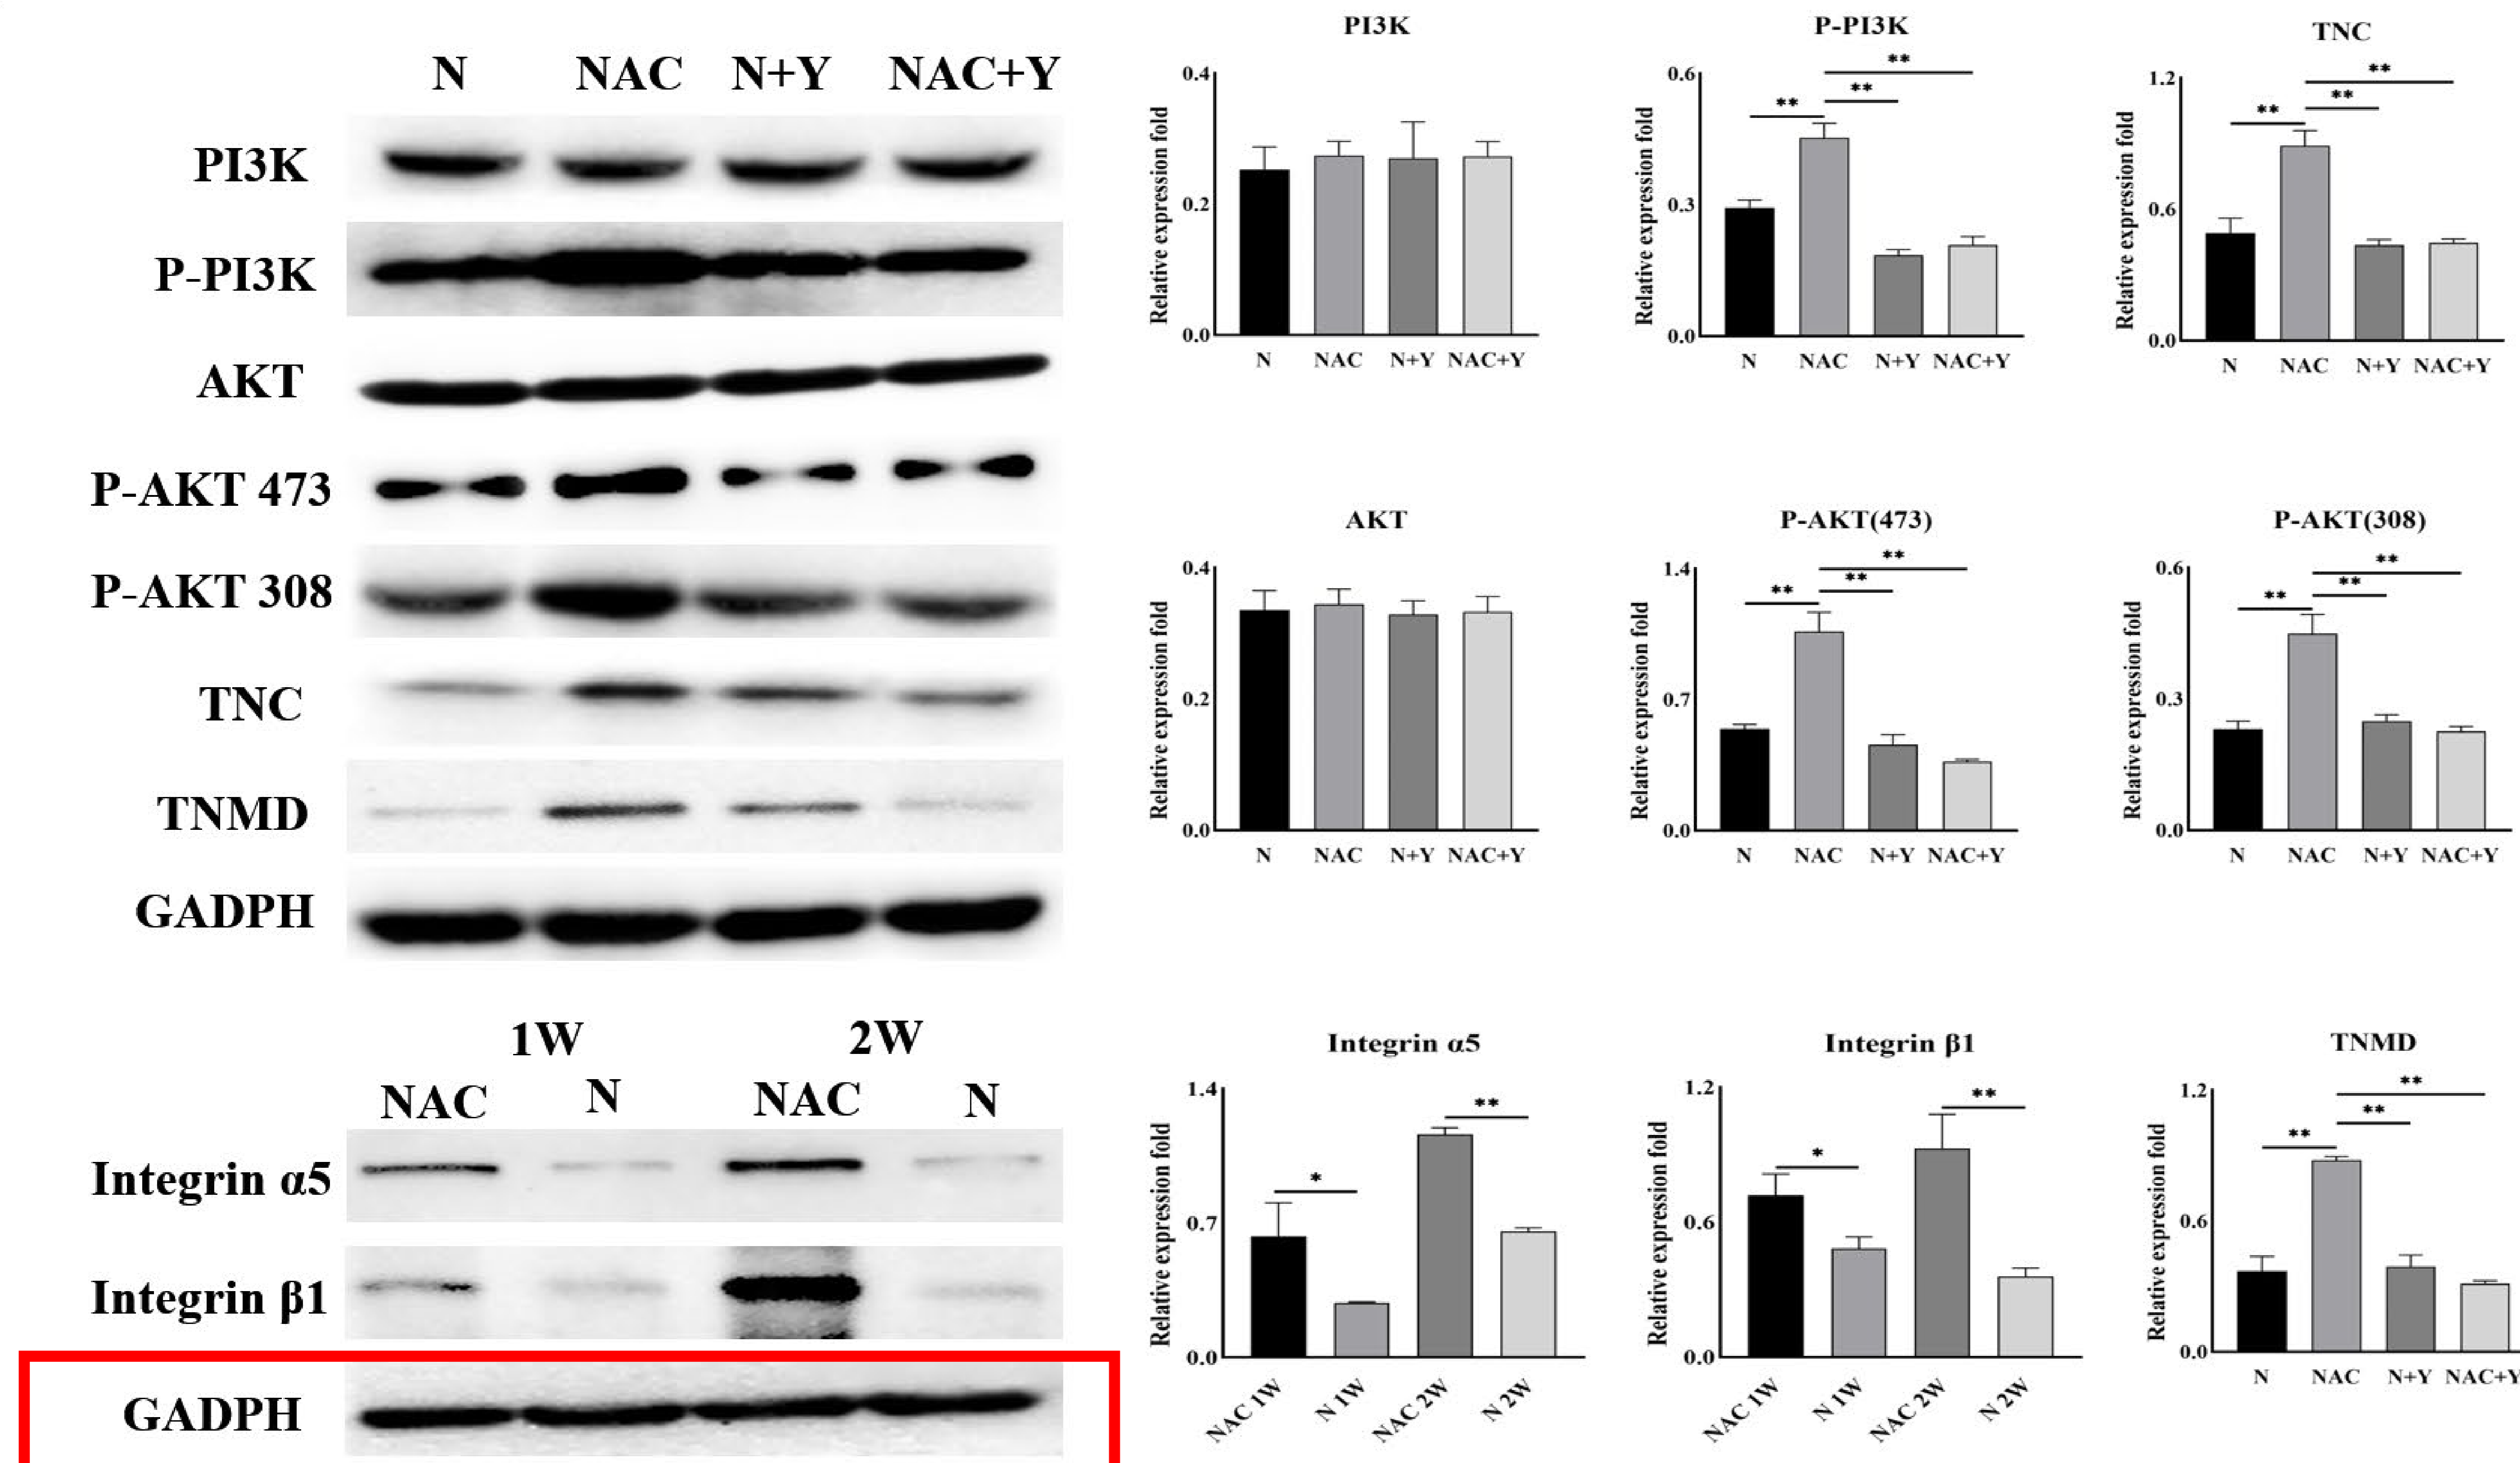

Supplement: 12860_2022_463_MOESM4_ESM.pdf [file 12860_2022_463_MOESM4_ESM.pdf]
